# Supplementary material for: Efficacy and Safety of Systemic Treatments Among Colorectal Cancer Patients: A Network Meta-Analysis of Randomized Controlled Trials
Source: PubMed Central journal article supplement (PMC8864322; doi:10.3389/fonc.2021.756214), 2022-02-09
Supplement: DataSheet_1.pdf [file DataSheet_1.pdf]

## **eMethods.**

### **1. Search strategy from databases**

#### *1.1 Pubmed and Cochrane library*

- Search syntax: (colon cancer OR rectal cancer OR colorectal cancer) AND (capecitabine OR 5-fluorouracil OR leucovorin OR irinotecan OR bevacizumab OR cetuximab OR oxaliplatin OR panitumumab) AND rando\*

- Search filter: clinical trial and human

#### *1.2 Embase*

- Search syntax: ('colon cancer' OR 'rectal cancer' OR 'colorectal cancer') AND (capecitabine OR 5-fluorouracil OR leucovorin OR irinotecan OR bevacizumab OR cetuximab OR oxaliplatin OR panitumumab) AND rando\*

- Search filter: clinical trial and human

#### *1.3 Clinicaltrials.gov*

- Search syntax: colorectal cancer AND (capecitabine OR 5-fluorouracil OR leucovorin OR irinotecan OR bevacizumab OR cetuximab OR oxaliplatin OR panitumumab)

- Search filter: having result studies

#### *1.4 Bibliography*

- (1) Ba-Sang DZ, Long ZW, Teng H, Zhao XP, Qiu J, Li MS. A network meta-analysis on the efficacy of sixteen targeted drugs in combination with chemotherapy for treatment of advanced/metastatic colorectal cancer. *Oncotarget* 2016;7: 84468-79.
- (2) Mocellin S, Baretta Z, Roque IFM, Solà I, Martin0Richard M, Hallum S, et al. Second-line systemic therapy for metastatic colorectal cancer. *Cochrane Database Syst Rev* 2017;1:CD006875.
- (3) Petrelli F, Ardito R, Ghidini A, Zaniboni A, Ghidini M, Barni S, et al. Different Toxicity of Cetuximab and Panitumumab in Metastatic Colorectal Cancer Treatment: A Systematic Review and Meta-Analysis. *Oncology* 2018;94: 191-9.
- (4) Tikhonova IA, Huxley N, Snowsill T, Crathorne L, Varley-Campbell J, Napier M, et al. Economic Analysis of First-Line Treatment with Cetuximab or Panitumumab for RAS Wild-Type Metastatic Colorectal Cancer in England. *Pharmacoeconomics* 2018; 36:837-51.
- (5) Wu DM, Wang YJ, Fan SH, Zhuang ZF, Shan Q, Han XR, et al. Network meta-analysis of the efficacy of first-line chemotherapy regimens in patients with advanced colorectal cancer. *Oncotarget* 2017;8: 100668-77.

## 2. Scheme for data analysis

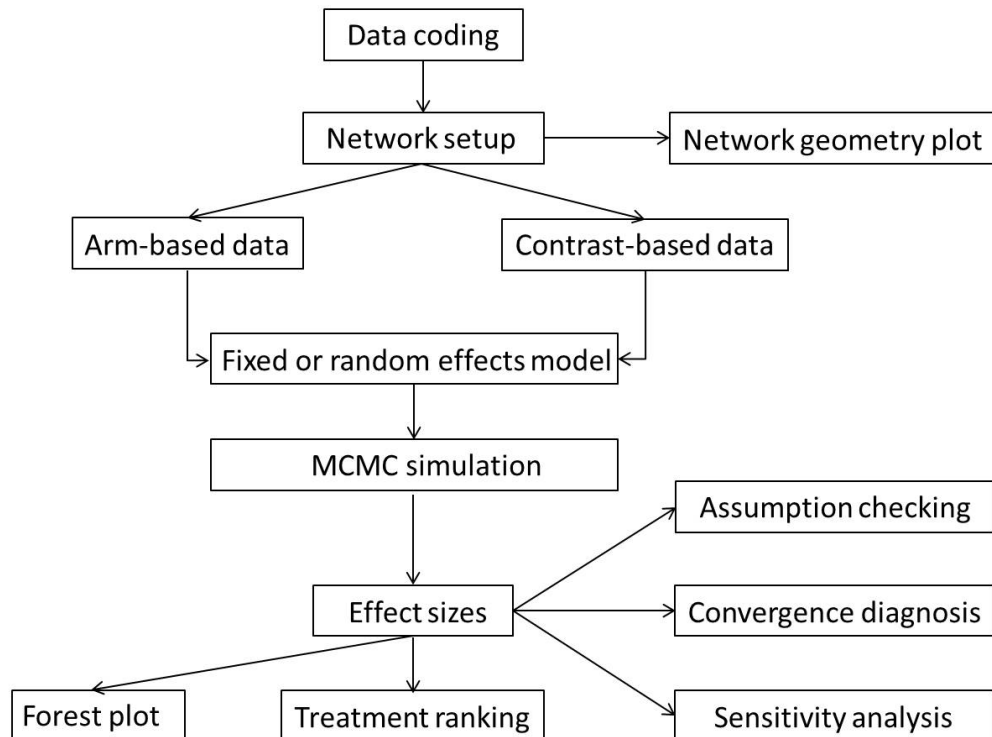

In the current study, arm-based data provides the absolute effect of each treatment arm for overall response rate (ORR), disease control rate (DCR), adverse events (AEs) grade  $\geq 3$ , and serious adverse events (SAEs) outcomes, while contrast-based data performs the relative effect between treatment arms for overall survival (OS) and progression-free survival (PFS) outcomes.

### 3. Model identification and parameters

The current network meta-analysis takes the form as generalized linear model (GLM):<sup>1</sup>

$$g(\gamma) = \theta_{ik} = \mu_i + \delta_{ik}$$

where  $g$  represents the appropriate link function,  $\theta_{ik}$  is the linear predictor, which is simply a regression model with  $S-1$  treatment effect parameters for the network of  $S$  treatments,  $\mu_i$  represent the trial-specific effects of treatment in arm 1 of trial  $i$ , and  $\delta_{ik}$  represent the trial-specific effects of treatment in arm  $k$  compared with the treatment in arm 1 in the same trial:

$$\delta_{ik} \sim Normal(d_{t_{i1}, t_{ik}}, \sigma^2)$$

with  $d_{t_{i1}, t_{ik}} = d_{1, t_{ik}} - d_{1, t_{i1}}$  is the mean effect of treatment in arm  $k$  in trial  $i$ ,  $t_{ik}$ , compared with the treatment in arm 1,  $t_{1k}$ , and  $\sigma^2$  is the between-trial variability in treatment effects.

#### 3.1 Fixed effects model

In the fixed effects model,<sup>1</sup> when there is no between-trial heterogeneity ( $\sigma^2 = 0$ ), the GLM formula can be written as:

$$\theta_{ik} = \mu_i + d_{t_{i1}, t_{ik}} = \mu_i + d_{1, t_{ik}} - d_{1, t_{i1}}$$

##### 3.1.1 Arm-based data

For binomial data (ORR, DCR, AE grade  $\geq 3$ , and SAE outcomes), the probabilities of event  $p_{ik}$  are modeled on the logit scales as:

$$\text{logit}(p_{ik}) = \mu_i + d_{1, t_{ik}} - d_{1, t_{i1}}$$

where the number of events  $r_{ik}$  and the number of patients  $n_{ik}$  in arm  $k$  of trial  $i$  follow the binomial likelihood:

$$r_{ik} \sim \text{Binomial}(p_{ik}, n_{ik})$$

### 3.1.2 Contrast-based data

For continuous data (OS and PFS outcomes), there is no trial-specific effect on control treatment and the linear predictor becomes:

$$\theta_{ik} = \delta_{ik}$$

The log hazard ratios  $\gamma_{ik}$  which measure the treatment effect of arm  $k$  relative to arm 1 in trial  $i$  with variance  $V_{ik}$  are defined in the normal likelihood:

$$\gamma_{ik} \sim \text{Normal}(\delta_{ik}, V_{ik})$$

### 3.2 Random effect model

In the random effects model,<sup>1</sup> the GLM formula additionally counts for between-trial heterogeneity ( $\sigma^2 > 0$ ) and the cumulative adjustment for multi-arm trials  $sw_{i,k}$

$$sw_{i,k} = \sum_{i=1}^{k-1} \frac{1}{k-1} (\delta_{i,k} - (d_{1,t_{ik}} - d_{1,t_{i1}}))$$

Then, the GLM formula can be written as:

$$\delta_{i,k} \mid \delta_{i,2}, \dots, \delta_{i,(k-1)} \sim \text{Normal}(d_{1,t_{ik}} - d_{1,t_{i1}} + sw_{i,k}, \frac{k}{2(k-1)} \sigma^2)$$

### 3.3 Meta-regression model

In the meta-regression model,<sup>2</sup> the interaction treatment effect per unit increases in the covariate value in comparisons of treatment 2, 3, ..., S to treatment 1. Thus, the GLM becomes:

$$\theta_{ik} = \mu_i + \delta_{ik} + \beta_{t_{i1}t_{ik}} x_i = \mu_i + \delta_{ik} + (\beta_{1,t_{ik}} - \beta_{1,t_{i1}}) x_i$$

The trial-level subgroup indicator,  $x_i$ , is defined:

$$x_i = \begin{cases} 0 & \text{if study } i \text{ is a primary study} \\ 1 & \text{if study } i \text{ is a secondary study} \end{cases}$$

### 3.4 Model parameters

$D_{res}$ , the residual deviance,<sup>3</sup> is equal to the deviance for a given model,  $D_{model}$ , minus the deviance for a saturated model,  $D_{sat}$ , which estimates how good the model fit:

$$D_{res} = D_{model} - D_{sat}$$

$\bar{D}_{model}$ , posterior mean residual deviances,<sup>3</sup> is obtained after computing  $D_{res}$  at each iteration of the MCMC simulation.

$\bar{D}_{model}$ , posterior mean deviances,<sup>3</sup> is defined as -2 times the log-likelihood,  $Loglik_{model}$ , which likelihood function measures how ‘likely’ observed data are given a particular model, for a given model, thus estimates how far the model predictions deviate from the observed data:

$$\bar{D}_{model} = -2Loglik_{model}$$

$p_D$ , the effective number of parameters,<sup>3</sup> is calculated by the posterior mean deviance for a given model,  $\bar{D}_{model}$ , minus the deviance calculated at some ‘plug-in’ estimate for the parameters,  $\hat{\theta}$ :

$$p_D = \bar{D}_{model} - D(\hat{\theta})$$

DIC, deviance information criterion,<sup>3</sup> is equal to the posterior mean deviance,  $\bar{D}_{model}$ , plus the effective number of parameters,  $p_D$ . The lower DIC value suggests a more parsimonious model:

$$DIC = \bar{D}_{model} + p_D$$

#### 4. References

1. Dias S, Sutton AJ, Ades AE, Welton NJ. Evidence synthesis for decision making 2: a generalized linear modeling framework for pairwise and network meta-analysis of randomized controlled trials. *Med Decis Making* 2013;33: 607-17.
2. Dias S, Sutton AJ, Welton NJ, Ades AE. Evidence synthesis for decision making 3: heterogeneity--subgroups, meta-regression, bias, and bias-adjustment. *Med Decis Making* 2013;33: 618-40.
3. Dias S, Welton NJ, Sutton AJ, Ades AE. NICE DSU Technical support document 2: A generalised linear modelling framework for pairwise and network meta-analysis of randomised controlled trials. *London*, 2014.
4. van Valkenhoef G, Kuiper J. gemtc: Network Meta-Analysis Using Bayesian Methods. R package version 08-2. <https://cran.r-project.org/web/packages/gemtc/gemtc.pdf>, 2016.
