# Supplementary material for: Efficacy and Safety of Systemic Treatments Among Colorectal Cancer Patients: A Network Meta-Analysis of Randomized Controlled Trials
Source: PubMed Central journal article supplement (PMC8864322; doi:10.3389/fonc.2021.756214), 2022-02-09
Supplement: DataSheet_2.pdf [file DataSheet_2.pdf]

**Supplementary Table S1.** General characteristics of individual studies included in the network meta-analysis.

| Study                            | Specific name/<br>Subgroup   | Time                | Country<br>(Phase)        | Line   | Treatment arms  |                | Sample size |     | Gender (M/F) |        | Age (years) |            |
|----------------------------------|------------------------------|---------------------|---------------------------|--------|-----------------|----------------|-------------|-----|--------------|--------|-------------|------------|
|                                  |                              |                     |                           |        | T1              | T2             | T1          | T2  | T1           | T2     | T1          | T2         |
| Lonardi 2020                     | PANDA<br>(NCT02904031)       | 07/2016-<br>04/2019 | Italy (phase<br>II)       | 1-line | FOLFOX/Pmab     | SFU/LV/Pmab    | 92          | 93  | 61/92        | 57/93  | 77          | 77         |
| Lipsyc-Sharf 2020<br>NCT02292758 | ACCRU                        | 07/2015-<br>01/2018 | US (phase II)             | 2-line | Cet/Iri/Bmab    | Cet/Iri        | 19          | 17  | 10/9         | 10/7   | 58 (41-71)  | 54 (39-82) |
| Hu 2020                          | FOCULM<br>(NCT02063529)      | 02/2014-<br>07/2019 | China (phase<br>II)       | 1-line | mFOLFOXIRI/Cet  | mFOLFOXIRI     | 67          | 34  |              |        |             |            |
| Guo 2020                         | NCT02935764                  | 10/2016-<br>10/2019 | China (phase<br>III)      | 2-line | FOLFIRI         | Iri            | 88          | 84  |              |        |             |            |
| Folprecht 2020                   | WT RAS                       | 2014-2018           | Germany<br>(phase II)     | 1-line | FOLFOXIRI/Cmab  | FOLFIRI/Cmab   | 28          | 26  |              |        |             |            |
|                                  | MT RAS/BRAF                  |                     |                           |        | FOLFOXIRI       | FOLFOXIRI/Bmab | 18          | 16  |              |        |             |            |
| Xu 2019                          |                              | 06/2013-<br>12/2017 | China (phase<br>II)       | 1-line | mFOLFOX6/Bmab   | mFOLFOX6       | 121         | 120 |              |        |             |            |
| Pietrantonio 2019                | VALENTINO<br>(NCT02476045)   | 07/2015-<br>07/2018 | Italy (phase<br>II)       | 1-line | 5-FU/LV/Pmab    | Pmab           | 117         | 112 | 79/38        | 74/38  | 63 (55-71)  | 62 (64-70) |
| Kienle 2019                      | SAKK 41/10<br>(NCT01718808)  | 01/2013-<br>12/2014 | Switzerland<br>(phase II) | 1-line | Cet             | Cet/Cap        | 11          | 13  | 8/3          | 8/5    | 79 (71-89)  | 80 (73-86) |
| Uetake 2018                      | ATOM<br>(NCT01836653)        | 05/2013-<br>04/2016 | Japan                     | 1-line | mFOLFOX6/Cet    | mFOLFOX6/Bmab  | 59          | 57  |              |        | 65          | 64         |
| Shapiro 2018                     | WT-Quadruple                 | 11/2012-<br>06/2016 | Australia<br>(phase II)   | 2-line | Cet/Iri         | Cet            | 25          | 21  | 18/7         | 13/8   | 65 (38-76)  | 67 (41-75) |
| Segelov 2016                     | MT-G13D                      | 11/2012-<br>12/2014 | 4 countries<br>(phase II) | 2-line | Cet/Iri         | Cet            | 26          | 25  | 20/6         | 19/6   | 66 (48-85)  | 61 (49-82) |
| Qin 2018<br>NCT01228734          | TAILOR                       | 09/2010-<br>01/2018 | China<br>(phase III)      | 1-line | Cet/FOLFOX4     | FOLFOX4        | 193         | 200 | 127/66       | 139/61 |             |            |
| Nakayama 2018                    | CCOG-1201                    | 06/2012-<br>04/2016 | Japan<br>(phase II)       | 1-line | CAPIRI/Bmab     | CAPOX/Bmab     | 53          | 54  | 32/21        | 36/18  | 69 (43-82)  | 67 (40-79) |
| Meropol 2018                     | ECOG ACRIN<br>4203           | 07/2005-<br>04/2012 | US<br>(phase II)          | 1-line | IROX/Bmab       | FOLFOX/Bmab    | 73          | 75  | 40/21        | 36/30  | 61 (37-85)  | 60 (31-79) |
| Maiello 2018                     | GOIM 2802                    |                     | Italy<br>(phase II)       | 1-line | FOLFOX4/Bmab    | CAPOX/Bmab     | 45          | 87  |              |        |             |            |
| Hurwitz 2018<br>NCT01765582      | STEAM                        | 01/2013-<br>03/2016 | US<br>(phase II)          | 1-line | cFOLFOXIRI/Bmab | FOLFOX/Bmab    | 93          | 95  | 51/42        | 59/36  | 56.0 (11.5) | 57.9 (9.9) |
|                                  |                              |                     |                           |        | sFOLFOXIRI/Bmab |                | 92          |     | 52/40        |        | 56.0 (10.5) |            |
| Gomez 2018                       | VISNU-1 TTD<br>(NCT01640405) | 07/2012-<br>11/2018 | Spain<br>(phase III)      | 1-line | FOLFOX/Bmab     | FOLFOXIRI/Bmab | 177         | 173 | 119/58       | 120/53 | 59          | 60.5       |
| Geissler 2018                    | AIO-KRK-0109                 |                     | phase II                  | 1-line | mFOLFOXIRI/Pmab | FOLFOXIRI      | 63          | 33  | 41/22        | 24/9   | 56.5        | 58.2       |
| Hou 2018                         |                              | 10/2010-<br>10/2012 | China                     | 1-line | FOLFOXIRI/Bmab  | FOLFOXIRI      | 58          | 58  | 26/32        | 24/34  | 57.4 (7.5)  | 57.9 (7.6) |
| Sugimoto 2017                    | WJOG6510G                    | 12/2011-<br>09/2014 | Japan<br>(phase II)       | 2-line | Pmab/Iri        | Cet/Iri        | 59          | 61  |              |        |             |            |
| Schmoll 2017                     | CHARTA<br>(NCT01321957)      | 07/2011-<br>12/2014 | Germany<br>(phase II)     | 1-line | FOLFOX/Bmab     | FOLFOXIRI/Bmab | 120         | 121 | 157/84       |        | 61 (21-82)  |            |
| Carrato 2017                     | PLANET-TTD                   | 05/2009-<br>11/2012 | Spain<br>(phase II)       | 1-line | Pmab/FOLFOX4    | Pmab/FOLFIRI   | 38          | 39  | 31/7         | 28/11  | 65 (32-79)  | 63 (37-83) |
| Yamazaki 2016                    | WJOG4407G                    | 09/2008-<br>01/2012 | Japan<br>(phase III)      | 1-line | Bmab/FOLFIRI    | Bmab/mFOLFOX6  | 197         | 198 | 104/93       | 12/76  | 63 (33-75)  | 62 (26-75) |

| Study                                       | Specific name/<br>Subgroup      | Time                | Country<br>(Phase)          | Line   | Treatment arms    |                   | Sample size |     | Gender (M/F) |         | Age (years) |             |
|---------------------------------------------|---------------------------------|---------------------|-----------------------------|--------|-------------------|-------------------|-------------|-----|--------------|---------|-------------|-------------|
|                                             |                                 |                     |                             |        | T1                | T2                | T1          | T2  | T1           | T2      | T1          | T2          |
| Shitara 2016                                | WJOG6210G<br>(UMIN000005216)    | 04/2011-<br>02/2014 | Japan<br>(phase II)         | 2-line | FOLFIRI/Pmab      | FOLFIRI/Bmab      | 59          | 58  | 34/25        | 39/19   | 62 (31-82)  | 64 (26-78)  |
| Ciardello 2016                              | CAPRI-GOIM                      | 02/2010-<br>09/2014 | Italy (phase<br>II)         | 2-line | FOLFOX/Cet        | FOLFOX            | 74          | 79  | 46/23        | 43/36   | 64 (35-79)  | 63 (40-80)  |
| Aparicio 2016                               | FFCD 2001-02<br>(NCT00303771)   | 06/2003-<br>05/2010 | France<br>(phase III)       | 1-line | LV5FU2            | FOLFIRI           | 142         | 140 | 75/67        | 76/64   | 80 (75-90)  | 80 (75-92)  |
| Tournigand 2015                             | GERCOR DREAM                    |                     | 3 countries<br>(phase III)  | 1-line | mFOLFOX7/Bmab     | XELOX2/Bmab       | 156         | 154 |              |         |             |             |
| Passardi 2015                               | ITACa<br>(NCT01878422)          | 11/2007-<br>03/2012 | Italy<br>(phase III)        | 1-line | FOLFOX4/Bmab      | FOLFOX4           | 103         | 118 | 108/68       | 115/79  | 66 (34-83)  | 66 (33-82)  |
|                                             |                                 |                     |                             |        | FOLFIRI/Bmab      | FOLFIRI           | 73          | 76  |              |         |             |             |
| Liu 2015                                    | WT-KRAS                         | 06/2010-<br>05/2014 | China<br>(phase II)         | 2-line | Pmab/Bmab/FOLFIRI | FOLFIRI           | 30          | 35  | 18/12        | 22/13   | 59 (21-82)  | 62 (25-80)  |
|                                             | MU-KRAS                         |                     |                             |        |                   |                   | 27          | 34  | 17/10        | 20/14   | 61 (22-79)  | 60 (29-85)  |
| Hecht 2015                                  | SPIRITT<br>(NCT00418938)        | 11/2006-<br>12/2010 | US<br>(phase II)            | 2-line | Pmab/FOLFIRI      | Bmab/FOLFIRI      | 91          | 91  | 62/29        | 58/33   | 60 (27-84)  | 60 (25-80)  |
| Gruenberger 2015                            | OLIVIA<br>(NCT00778102)         | 10/2008-<br>12/2011 | 4 countries<br>(phase II)   | 1-line | Bmab/FOLFOXIRI    | Bmab/mFOLFOX6     | 41          | 39  | 29/12        | 71/29   | 63 (32-77)  | 57 (28-80)  |
| Cremolini 2015                              | TRIBE<br>(NCT00719797)          | 07/2008-<br>05/2011 | Italy<br>(phase III)        | 1-line | FOLFIRI/Bmab      | FOLFOXIRI/Bmab    | 256         | 252 | 156/100      | 150/102 | 60 (53-67)  | 61 (52-68)  |
| Xie 2014                                    |                                 | 12/2009-<br>11/2013 | China                       | 2-line | FOLFIRI           | Pmab/Bmab/FOLFIRI | 155         | 137 | 98/57        | 81/56   | 58 (21-86)  | 61 (23-85)  |
| Schwartzberg<br>2014                        | PEAK                            | 04/2009-<br>12/2011 | 6 countries<br>(phase II)   | 1-line | Pmab/mFOLFOX6     | Bmab/mFOLFOX6     | 142         | 143 | 86/56        | 96/47   | 63 (23-82)  | 61 (28-82)  |
| Price 2014<br>NCT01001377                   | ASPECT                          | 02/2010-<br>07/2012 | 27 countries<br>(phase III) | 2-line | Pmab              | Cet               | 499         | 500 | 315/184      | 318/182 | 61          | 60.5        |
| Peeters 2014<br>Peeters 2010<br>NCT00339183 | WT KRAS                         | 06/2006-<br>03/2008 | Phase III                   | 2-line | Pmab/FOLFIRI      | FOLFIRI           | 303         | 294 | 188/115      | 191/103 | 60 (28-94)  | 61 (29-86)  |
|                                             | MT KRAS                         |                     |                             |        |                   |                   | 238         | 248 | 133/105      | 148/100 | 61 (29-83)  | 64 (29-86)  |
| Heinemann 2014                              | FIRE-3<br>(NCT00433927)         | 01/2007-<br>09/2012 | 2 countries<br>(phase III)  | 1-line | FOLFIRI/Cet       | FOLFIRI/Bmab      | 297         | 295 | 184/297      | 171/295 | 64 (38-79)  | 65 (27-76)  |
| Folprecht 2014<br>Folprecht 2010            | CELM<br>(NCT00153998)           | 12/2004-<br>03/2008 | 2 countries<br>(phase II)   | 1-line | FOLFOX6/Cet       | FOLFIRI/Cet       | 56          | 55  | 36/20        | 35/20   | 65.1        | 62          |
| Douillard 2014                              | WT KRAS                         | 08/2006-<br>02/2008 | 19 countries<br>(phase III) | 1-line | Pmab/FOLFOX4      | FOLFOX4           | 325         | 331 | 217/108      | 204/127 | 62 (27, 85) | 61 (24, 82) |
|                                             | MT KRAS                         |                     |                             |        |                   |                   | 221         | 219 | 145/76       | 128/91  | 63 (33, 83) | 61 (27, 82) |
| Cao 2014                                    |                                 | 06/2010-<br>05/2014 | China (phase<br>II)         | 2-line | Bmab/FOLFIRI      | FOLFIRI           | 65          | 77  | 40/25        | 48/29   | 62 (30-79)  | 61 (24-81)  |
| Seymour 2013                                | PICCOLO                         | 12/2006-<br>08/2010 | UK                          | 2-line | Iri               | Pmab/Iri          | 230         | 230 | 158/72       | 160/70  | 63 (56-69)  | 64 (57-70)  |
| Schmiegel 2013                              |                                 | 07/2005-<br>10/2006 | Germany<br>(phase II)       | 1-line | CAPOX/Bmab        | mCAPIRI/Bmab      | 127         | 120 | 84/43        | 80/40   | 64 (27-84)  | 65 (30-82)  |
| Personeni 2013                              | NCT01068132                     | 04/2009-<br>06/2012 | Italy<br>(phase II)         | 1-line | FOLFIRI           | FOLFIRI/Cet       | 35          | 54  |              |         |             |             |
| Hong 2013                                   |                                 | 05/2006-<br>04/2008 | Korea (phase<br>II)         | 1-line | Cap               | CAPOX             | 40          | 40  | 23/17        | 22/18   | 71 (66-81)  | 72 (65-79)  |
| Ducreux 2013                                | ACCORD 13/0503<br>(NCT00423696) | 03/2006-<br>01/2008 | France (phase<br>II)        | 1-line | Bmab/XELIRI       | Bmab/FOLFIRI      | 72          | 73  | 64/36        | 48/52   | 61 (38-74)  | 61 (24-75)  |

| Study                           | Specific name/<br>Subgroup  | Time                | Country<br>(Phase)          | Line   | Treatment arms  |                | Sample size |     | Gender (M/F) |         | Age (years) |            |
|---------------------------------|-----------------------------|---------------------|-----------------------------|--------|-----------------|----------------|-------------|-----|--------------|---------|-------------|------------|
|                                 |                             |                     |                             |        | T1              | T2             | T1          | T2  | T1           | T2      | T1          | T2         |
| Cunningham 2013                 | AVEX<br>(NCT00484939)       | 07/2007-<br>12/2010 | 10 countries<br>(phase III) | 1-line | Bmab/Cap        | Cap            | 140         | 140 | 84/56        | 84/56   | 76 (70-87)  | 77 (70-87) |
| Tveit 2012                      | NORDIC-VII<br>(NCT00145314) | 05/2005-<br>10/2007 | 4 countries<br>(phase III)  | 1-line | Nordic FLOX     | Cet/FLOX       | 185         | 194 | 100/85       | 120/74  | 61 (30-75)  | 61 (24-74) |
| Souglakos 2012                  | NCT00469443                 | 06/2005-<br>06/2008 | Greece (phase<br>II)        | 1-line | FOLFIRI/Bmab    | CAPIRI/Bmab    | 167         | 166 | 104/63       | 109/57  | 66 (33-80)  | 67 (26-80) |
| Saltz 2012                      |                             |                     | phase III                   | 1-line | mFOLFOX6/Bmab   | LV5FU/Bmab/Cet | 124         | 123 | 70/54        | 73/50   | 61 (32-87)  | 63 (35-87) |
| Pectasides 2012                 | ACTRN<br>12610000270011     | 01/2006-<br>01/2008 | phase III                   | 1-line | XELIRI/Bmab     | FOLFIRI/Bmab   | 143         | 142 | 79/64        | 92/50   | 66 (28-84)  | 66 (32-80) |
| Dotan 2012                      | NCT00321100                 | 06/2006-<br>05/2008 | US (phase II)               | 1-line | CAPOX/Cet/Bmab  | CAPOX/Cet      | 12          | 11  | 8/4          | 10/1    | 59 (42-78)  | 58 (42-74) |
| Van 2011                        |                             |                     | Phase III                   | 1-line | FOLFIRI/Cet     | FOLFIRI        | 599         | 599 | 369/230      | 356/243 | 61 (22-82)  | 61 (19-84) |
| Moosmann 2011                   | KRK-0104                    | 09.2004-<br>12/2006 | Germany<br>(phase II)       | 1-line | CAPIRI/Cet      | CAPOX/Cet      | 89          | 88  | 63/26        | 63/25   | 63 (32-75)  | 62 (38-77) |
| Masi 2011<br>Falcone 2007       | NCT01219920                 | 11/2001-<br>04/2005 | Italy<br>(phase III)        | 1-line | FOLFIRI         | FOLFOXIRI      | 122         | 122 | 69/53        | 75/47   | 64 (21-75)  | 62 (27-75) |
| Guan 2011                       | ARTIST<br>(NCT00642577)     | 07/2007-<br>08/2008 | China (phae<br>III)         | 1-line | Bmab/mIFL       | mIFL           | 139         | 64  | 36/28        | 70/69   | 53 (23-77)  | 50 (22-72) |
| Fischer 2011                    |                             | 07/2000-<br>10/2004 | Germany<br>(phase III)      | 1-line | FUFIRI          | mIROX          | 238         | 241 | 158/80       | 177/64  | 63 (32-79)  | 63 (21-79) |
| Ducreux 2011                    | ML16987                     | 05/2003-<br>08/2004 | France (Phase<br>III)       | 1-line | XELOX           | FOLFOX6        | 156         | 150 | 100/56       | 90/60   | 66 (32-83)  | 64 (42-84) |
| Cassidy 2011<br>Cassidy 2008    | NO16966                     | 07/2003-<br>05/2004 | Phase II                    | 1-line | FOLFOX4         | XELOX          | 317         | 317 | 204/113      | 194/123 | 62 (24-83)  | 61 (24-84) |
|                                 |                             |                     |                             |        | FOLFOX4/Placebo | XELOX/Placebo  | 351         | 350 | 186/165      | 205/145 | 60 (26-83)  | 61 (18-83) |
|                                 |                             | 02/2004-<br>02/2005 |                             |        | FOLFOX4/Bmab    | XELOX/Bmab     | 349         | 350 | 59/41        | 213/137 | 60 (19-82)  | 61 (18-86) |
| Vamvakas 2010<br>Souglakos 2006 | HORG                        | 10/2000-<br>12/2004 | FOLFIRI                     | 1-line | FOLFIRI         | FOLFOXIRI      | 146         | 137 | 82/61        | 76/61   | 66 (39-84)  | 66 (25-82) |
| Oevirk 2010                     | CECOG                       | 07/2005-<br>07/2006 | 13 countries<br>(phase II)  | 1-line | FOLFOX6/Cet     | FOLFIRI/Cet    | 77          | 74  | 43/34        | 45/29   | 62          | 62.5       |
| Tol 2009                        | CAIRO2<br>(NCT00208546)     | 06/2005-<br>12/2006 | Netherlands<br>(phase III)  | 1-line | CAPOX/Bmab      | CAPOX/Bmab/Cet | 368         | 368 | 205/163      | 233/135 | 62 (27-83)  | 62 (33-80) |
| Moehler 2009                    |                             | 2001-2006           | Germany<br>(phase II)       | 1-line | CAPIRI          | CAPIRI/Bmab    | 17          | 29  | 9/8          | 22/7    | 66 (55-81)  | 60 (37-80) |
| Bokemeyer 2009                  |                             | 06/2005-<br>03/2006 | Phase II                    | 1-line | FOLFOX4         | Cet/FOLFOX4    | 168         | 169 | 92/76        | 89/80   | 60 (30-82)  | 62 (24-82) |
| Aranda 2009                     |                             | 10/2001-<br>19/2005 | Spain                       | 1-line | FOLFIRI         | FUIRI          | 173         | 173 | 110/63       | 110/63  | 63 (29-75)  | 63 (28-75) |
| Hochster 2008                   | TREE-1                      | 12/2002-<br>11/2003 | US                          | 1-line | mFOLFOX6        | CAPOX          | 49          | 48  | 57/43        | 65/35   | 62 (35-79)  | 63 (32-84) |
|                                 |                             |                     |                             |        |                 | bFOL           |             |     | 50           |         | 62/38       |            |
|                                 | TREE-2                      | 11/2003-<br>04/2004 |                             |        | mFOLFOX6/Bmab   | CAPOX/Bmab     | 71          | 72  | 61/39        | 58/42   | 64 (31-83)  | 62 (32-82) |
|                                 |                             |                     |                             |        |                 | bFOL/Bmab      |             |     | 70           |         | 49/51       |            |
| Sobrero 2008                    | EPIC                        | 05/2003-<br>02/2006 | Phase III                   | 2-line | Cet/Iri         | Iri            | 648         | 650 | 405/243      | 411/239 | 61 (23-85)  | 62 (21-90) |

| Study           | Specific name/<br>Subgroup | Time            | Country<br>(Phase)      | Line   | Treatment arms |                | Sample size |     | Gender (M/F) |         | Age (years) |            |
|-----------------|----------------------------|-----------------|-------------------------|--------|----------------|----------------|-------------|-----|--------------|---------|-------------|------------|
|                 |                            |                 |                         |        | T1             | T2             | T1          | T2  | T1           | T2      | T1          | T2         |
| Rothenberg 2008 |                            | 07/2003-05/2005 | 19 countries (phase II) | 2-line | FOLFOX4        | XELOX          | 314         | 313 | 191/123      | 194/119 | 60 (26-83)  | 61 (26-81) |
| Heinemann 2008  | AIO                        | -               | German                  | 1-line | Cet/XELIRI     | Cet/XELOX      | 93          | 92  | -            | -       | 63          | 62         |
| Haller 2008     |                            | 01/2001-04/2004 | 7 countries (phase III) | 2-line | IROX           | Iri            | 317         | 310 | 189/128      | 189/121 | 62 (25-88)  | 63 (28-85) |
| Borner 2008     |                            | 06/2004-10/2005 | Phase II                | 1-line | CAPOX          | CAPOX/Cet      | 37          | 37  | 21/16        | 23/14   | 63 (47-80)  | 60 (37-81) |
| Saltz 2007      | BOND-2                     | -               | Phase II                | 2-line | Cet/Bmab/Iri   | Cet/Bmab       | 43          | 40  | 26/17        | 26/14   | 64 (43-86)  | 56 (24-80) |
| Porschen 2007   | AIO                        |                 | 2 countries (phase III) | 1-line | CAPOX          | FUFOX          | 241         | 233 | 150/91       | 146/87  | 66 (32-81)  | 64 (34-86) |
| Hospers 2006    |                            |                 | Netherlands (phase III) | 1-line | LV5FU          | LV5FU+Oxa      | 151         | 151 | 88/63        | 100/51  | 62 (28-84)  | 62 (41-80) |
| Goldberg 2006   |                            | 04/2001-04/2002 | 5 NCIs                  | 1-line | FOLFOX4        | rIFL           | 154         | 151 | 90/64        | 97/54   | 58 (19-83)  | 60 (27-83) |
| Polikoff 2005   | EXPLORE                    | 03/2003-10/2004 | Phase III               | 2-line | Cet/FOLFOX4    | FOLFOX4        | 43          | 47  | 49/41        |         | 59          |            |
| NCT00252564     |                            | 09/2005-07/2007 | US (phase III)          | 1-line | FOLFOX/Bmab    | LV5FU/Cet/Bmab | 124         | 123 | 70/54        | 73/50   | 61 (12)     | 63 (11)    |
| Kalofonos 2005  |                            | 01/1999-02/2002 | Phase II                | 1-line | LV5FU/Iri      | LV5FU+Oxa      | 147         | 148 | 90/57        | 92/56   | 66 (28-78)  | 65 (32-86) |
| Colucci 2005    |                            | 03/1999-11/2002 | Italy (phase III)       | 1-line | FOLFIRI        | FOLFOX4        | 178         | 182 | 93/85        | 109/73  | 62 (32-75)  | 62 (31-75) |
| Comella 2005    |                            | 01/2001-06/2003 | Italy (phase III)       | 1-line | IRIFAFU        | LV5FU+Oxa      | 136         | 140 | 72/64        | 81/59   | 62 (38-80)  | 62 (37-79) |
| Tournigand 2004 | GERCOR                     | 12/1997-09/1999 | 3 countries (phase III) | 1-line | FOLFIRI        | FOLFOX6        | 109         | 111 | 62/47        | 80/31   | 61 (29-75)  | 65 (40-75) |
|                 |                            |                 |                         | 2-line | FOLFOX6        | FOLFIRI        | 81          | 69  |              |         |             |            |
| Hurwitz 2004    |                            | 09/2000-05/2002 | 3 countries (phase III) | 1-line | IFL/Bmab       | IFL/Placebo    | 402         | 411 | 59/41        | 60/40   | 59.5        | 59.2       |
| Goldberg 2004   |                            | 05/1999-04/2001 | 5 NCIs                  | 1-line | FOLFOX4        | IFL            | 267         | 264 | 157/110      | 172/92  | 61 (27-88)  | 61 (28-88) |
|                 |                            |                 |                         |        | IROX           |                | 264         |     | 161/103      |         | 61 (29-84)  |            |
| Cunningham 2004 |                            | 07/2001-05/2002 | 11 countries            | 2-line | Cet/Iri        | Cet            | 218         | 111 | 143/75       | 63/48   | 59 (26-82)  | 58 (39-84) |
| Rothenberg 2003 |                            | 11/2000-09/2001 | US (phase III)          | 2-line | LV5FU2         | FOLFOX4        | 151         | 152 | 82/69        | 87/65   | 60 (21-80)  | 59 (22-88) |
|                 |                            |                 |                         |        | Oxa            |                | 156         |     | 95/61        |         | 61 (27-79)  |            |
| Rougier 2002    |                            | 06/1997-08/1998 | Phase II                | 2-line | Iri/LV5FU2     | IROX           | 35          | 33  | 23/12        | 14/19   | 66 (39-76)  | 60 (31-75) |
|                 |                            |                 |                         |        | Oxa/LV5FU2     |                | 33          |     | 25/8         |         | 65 (39-75)  |            |
| Maiello 2000    | GOIM 9706                  | 11/1997-01/1999 | Italy (phase II)        | 1-line | LV5FU2         | LV5FU2/Iri     | 34          | 68  | 22/12        | 35/33   | 61 (42-75)  | 60 (33-75) |
| De Gramont 2000 |                            | 08/1995-07/1997 | 9 countries (phase III) | 1-line | LV5FU2         | LV5FU2/Oxa     | 210         | 210 | 122/88       | 127/83  | 63 (22-76)  | 63 (20-76) |
| NCT02337946     | SAPPHIRE                   | 10/2014-03/2017 | Japan (phase II)        | 2-line | mFOLFOX6/Pmab  | 5-FU/LV/Pmab   | 164         |     | 109/55       |         | 66.6 (10.3) |            |

| Study       | Specific name/<br>Subgroup | Time                | Country<br>(Phase)         | Line   | Treatment arms |              | Sample size |     | Gender (M/F) |        | Age (years) |             |
|-------------|----------------------------|---------------------|----------------------------|--------|----------------|--------------|-------------|-----|--------------|--------|-------------|-------------|
|             |                            |                     |                            |        | T1             | T2           | T1          | T2  | T1           | T2     | T1          | T2          |
| NCT01374425 | MAVERICC                   | 08/2011-<br>05/2015 | 7 countries<br>(phase II)  | 1-line | Bmab/mFOLFOX6  | Bmab/FOLFIRI | 188         | 188 | 122/66       | 117/71 | 59.2 (10.9) | 60.7 (10.7) |
| NCT01131078 |                            | 06/2005-<br>11/2012 | Italy<br>(phase II)        | 1-line | Bmab/CAPIRI    | Bmab/Cap1250 | 101         | 102 | 43/58        | 49/53  | 61.6 (9.35) | 61.5 (10.2) |
|             |                            |                     |                            |        |                | Bmab/Cap650  |             | 103 |              | 40/63  |             | 61.0 (10.1) |
| NCT00778830 | APEC                       | 02/2009-<br>04/2014 | Singapore<br>(phase II)    | 1-line | Cet/FOLFIRI    | Cet/FOLFOX   | 101         | 188 | 66/35        | 119/69 |             |             |
| NCT00349336 |                            | 08/2006-<br>11/2008 | 3 countries<br>(phase III) | 1-line | XELOX/Bmab     | FOLFOX4/Bmab | 32          | 32  | 19/13        | 15/17  | 55.9 (12.6) | 57.9 (10.8) |

Bmab, bevacizumab; Cap, capecitabine; Cet, cetuximab; Iri, irinotecan; Oxa, oxaliplatin; Pmab, panitumumab; CAPOX or XELOX, capecitabine/oxaliplatin; CAPIRI or XELIRI, capecitabine/irinotecan; FOL or FOLFOX or FUFOX, 5-fluorouracil/leucovorin/oxaliplatin; FOLFOFIRI, 5-fluorouracil/leucovorin/oxaliplatin/irinotecan; FUFIRI or FOLFIRI or IFL, 5-fluorouracil/leucovorin/irinotecan; FUIRI, 5-fluorouracil/irinotecan; IROX, irinotecan/oxaliplatin; LV5FU, leucovorin/5-fluorouracil; b, bolus; c, concurrently; m, modified; s, sequentially.

**Supplementary Table S2.** Summary findings of individual studies included in the network meta-analysis.

| Study             | Treatment arms |       | ORR     |        | DCR     |         | OS               | PFS              | AEs grade $\geq 3$ |         | SAEs   |        |
|-------------------|----------------|-------|---------|--------|---------|---------|------------------|------------------|--------------------|---------|--------|--------|
|                   | T1             | T2    | T1      | T2     | T1      | T2      |                  |                  | T1                 | T2      | T1     | T2     |
| Lonardi 2020      | LFOP           | LFP   | 60/92   | 53/93  |         |         |                  |                  |                    |         |        |        |
| Lipsyc-Sharf 2020 | CIB            | CI    | 7/19    | 2/17   |         |         | 0.41 (0.15-1.09) | 0.64 (0.25-1.66) | 9/19               | 6/17    |        |        |
| NCT02292758       | CIB            | CI    |         |        | 13/19   | 9/17    |                  |                  |                    |         | 5/19   | 5/17   |
| Hu 2020           | LFOIC          | LFOI  | 64/67   | 26/34  |         |         |                  |                  |                    |         |        |        |
| Guo 2020          | LFI            | I     | 5/86    | 5/84   | 54/88   | 46/84   |                  |                  |                    |         |        |        |
| Folprecht 2020    | LFOIC          | LFIC  | 21/26   | 24/28  |         |         |                  |                  |                    |         |        |        |
|                   | LFOI           | LFOIB | 13/18   | 14/20  |         |         |                  |                  |                    |         |        |        |
| Xu 2019           | LFOB           | LFO   | 66/121  | 44/120 |         |         |                  |                  |                    |         |        |        |
| Pietrantonio 2019 | CIB            | CI    | 78/117  | 75/112 | 97/117  | 94/112  | 1.13 (0.71-1.81) | 1.51 (1.11-2.07) |                    |         |        |        |
| Kienle 2019       | C              | XC    | 1/11    | 4/13   | 6/11    | 9/13    |                  |                  |                    |         |        |        |
| Uetake 2018       | LFOC           | LFOB  | 51/59   | 39/57  |         |         |                  | 0.80 (0.51-1.26) |                    |         |        |        |
| Shapiro 2018      | CI             | C     | 9/24    | 2/20   | 20/24   | 16/20   | 0.66 (0.35-1.23) | 0.39 (0.20-0.78) | 12/24              | 5/20    | 10/24  | 3/20   |
| Segelov 2016      | CI             | C     | 2/23    | 0/24   | 18/23   | 14/24   | 0.95 (0.53-1.68) | 0.74 (0.41-1.31) | 16/27              | 11/25   | 10/27  | 5/25   |
| Qin 2018          | LFOC           | LFO   | 128/193 | 81/200 |         |         | 0.76 (0.61-0.95) | 0.63 (0.50-0.79) |                    |         |        |        |
| NCT01228734       | LFOC           | LFO   |         |        |         |         |                  |                  |                    |         | 42/194 | 27/199 |
| Nakayama 2018     | XIB            | XOB   | 29/53   | 30/54  | 49/53   | 51/54   | 1.19 (0.72-1.96) | 1.13 (0.75-1.70) |                    |         |        |        |
| Meropol 2018      | IOB            | LFOB  | 20/61   | 25/66  | 45/61   | 61/66   | 1.30 (0.90-1.90) | 1.10 (0.80-1.60) |                    |         |        |        |
| Maiello 2018      | LFOB           | XOB   | 25/45   | 42/87  |         |         | 1.21 (0.77-1.92) | 0.96 (0.65-1.41) |                    |         |        |        |
| Hurwitz 2018      | LFOIB          | LFOB  | 134/185 | 59/95  |         |         |                  | 0.68 (0.50-0.92) |                    |         |        |        |
| NCT01765582       | LFOIB          | LFOB  |         |        |         |         |                  |                  |                    |         | 81/181 | 43/90  |
| Gomez 2018        | LFOB           | LFOIB |         |        |         |         |                  |                  | 110/177            | 132/173 |        |        |
| Geissler 2018     | LFOIP          | LFOI  | 54/63   | 18/33  | 61/63   | 26/33   |                  | 1.12 (0.69-1.75) |                    |         | 21/63  | 4/33   |
| Hou 2018          | LFOIB          | LFOI  | 41/58   | 29/58  | 51/58   | 45/58   |                  |                  |                    |         |        |        |
| Sugimoto 2017     | IP             | CI    | 13/59   | 16/61  | 44/59   | 50/61   | 0.68 (0.46-1.02) | 0.68 (0.47-0.99) |                    |         |        |        |
| Schmoll 2017      | LFOB           | LFOIB | 72/120  | 85/121 | 102/120 | 110/121 |                  | 0.80 (0.61-1.04) |                    |         |        |        |
| Carrato 2017      | LFOP           | LFIP  | 28/38   | 26/39  |         |         | 1.00 (0.60-1.80) | 0.90 (0.60-1.50) | 32/38              | 30/39   | 13/34  | 15/39  |

| Study             | Treatment arms |       | ORR     |         | DCR     |         | OS               | PFS              | AEs grade ≥3 |         | SAEs    |         |
|-------------------|----------------|-------|---------|---------|---------|---------|------------------|------------------|--------------|---------|---------|---------|
|                   | T1             | T2    | T1      | T2      | T1      | T2      |                  |                  | T1           | T2      | T1      | T2      |
| Yamazaki 2016     | LFIB           | LFOB  | 118/185 | 112/180 | 170/185 | 166/180 | 0.99 (0.79-1.25) | 0.91 (0.72-1.13) |              |         |         |         |
| Shitara 2016      | LFIP           | LFIB  | 24/52   | 3/53    | 41/52   | 51/53   |                  |                  | 54/61        | 40/60   |         |         |
| Ciardello 2016    | LFOC           | LFO   | 16/74   | 10/79   | 48/74   | 47/79   | 0.57 (0.32-1.02) | 0.81 (0.58-1.12) |              |         |         |         |
| Aparicio 2016     | LF             | LFI   | 28/133  | 61/132  | 87/133  | 104/132 | 0.96 (0.75-1.24) | 0.84 (0.66-1.07) | 71/136       | 103/135 |         |         |
| Tournigand 2015   | LFOB           | XOB   |         |         |         |         | 1.24 (0.98-1.59) | 0.98 (0.74-1.31) | 43/156       | 58/154  |         |         |
| Passardi 2015     | LFOB           | LFO   | 58/103  | 59/118  |         |         |                  |                  |              |         |         |         |
|                   | LFIB           | LFI   | 31/73   | 38/76   |         |         |                  |                  |              |         |         |         |
| Liu 2015          | LFIBP          | LFI   | 14/30   | 9/35    | 19/30   | 12/35   | 0.79 (0.47-0.89) | 0.45 (0.22-0.64) | 28/30        | 21/35   |         |         |
|                   | LFIBP          | LFI   | 12/27   | 10/34   | 20/27   | 18/34   | 0.44 (0.19-0.61) | 0.65 (0.37-0.88) | 25/27        | 19/34   |         |         |
| Hecht 2015        | LFIP           | LFIB  | 28/87   | 16/83   | 63/87   | 66/83   | 1.06 (0.75-1.49) | 1.01 (0.68-1.50) | 77/91        | 65/91   | 42/91   | 30/91   |
| Gruenberger 2015  | LFOIB          | LFOB  | 33/41   | 24/39   |         |         | 0.35 (0.15-0.80) | 0.43 (0.26-0.72) | 38/40        | 31/37   | 24/40   | 24/37   |
| Cremolini 2015    | LFIB           | LFOIB | 139/257 | 164/252 |         |         | 0.80 (0.65-0.98) | 0.77 (0.65-0.93) |              |         |         |         |
| Xie 2014          | LFI            | LFIBP | 47/155  | 55/137  | 81/155  | 85/137  |                  |                  | 124/155      | 80/137  |         |         |
| Schwartzberg 2014 | LFOP           | LFOB  | 82/142  | 76/143  | 128/142 | 122/143 | 0.62 (0.44-0.89) | 0.87 (0.65-1.17) | 126/139      | 115/139 | 61/139  | 53/139  |
| Price 2014        | P              | C     | 107/486 | 96/485  | 333/486 | 332/485 | 0.97 (0.84-1.11) | 1.00 (0.88-1.14) | 246/496      | 236/503 |         |         |
| NCT01001377       | P              | C     |         |         |         |         |                  |                  |              |         | 169/503 | 151/496 |
| Peeters 2014      | LFIP           | LFI   | 107/297 | 28/286  | 221/297 | 185/286 | 0.92 (0.78-1.10) | 0.82 (0.69-0.97) |              |         |         |         |
|                   | LFIP           | LFI   | 31/232  | 35/237  | 159/232 | 148/237 | 0.93 (0.77-1.13) | 0.94 (0.78-1.14) |              |         |         |         |
| Peeters 2010      | LFIP           | LFI   |         |         |         |         |                  |                  | 219/302      | 152/294 |         |         |
|                   | LFIP           | LFI   |         |         |         |         |                  |                  | 151/237      | 123/246 |         |         |
| NCT00339183       | LFIP           | LFI   |         |         |         |         |                  |                  |              |         | 232/587 | 175/594 |
| Heinemann 2014    | LFIC           | LFIB  | 184/297 | 171/295 | 237/297 | 256/295 | 0.77 (0.62-0.96) | 1.06 (0.88-1.26) | 211/297      | 188/295 |         |         |
| Folprecht 2014    | LFOC           | LFIC  |         |         |         |         | 1.18 (0.79-1.74) | 1.03 (0.66-1.61) |              |         |         |         |
| Folprecht 2010    | LFOC           | LFIC  | 36/53   | 30/53   | 51/53   | 46/53   |                  |                  | 38/54        | 41/55   |         |         |
| Douillard 2014    | LFOP           | LFO   | 181/317 | 154/324 | 280/317 | 271/324 | 0.88 (0.73-1.06) | 0.80 (0.67-0.95) |              |         | 262/585 | 198/584 |
|                   | LFOP           | LFO   | 86/215  | 86/211  | 166/215 | 176/211 | 1.17 (0.95-1.45) | 1.27 (1.04-1.55) |              |         |         |         |
| Cao 2014          | LFIB           | LFI   | 31/65   | 22/77   | 56/65   | 51/77   |                  |                  | 41/65        | 58/77   |         |         |
| Seymour 2013      | I              | IP    | 27/230  | 79/230  | 118/230 | 135/230 | 1.01 (0.83-1.23) | 0.78 (0.64-0.95) | 87/218       | 129/219 |         |         |

| Study           | Treatment arms |      | ORR     |         | DCR     |         | OS               | PFS              | AEs grade ≥3 |         | SAEs    |         |
|-----------------|----------------|------|---------|---------|---------|---------|------------------|------------------|--------------|---------|---------|---------|
|                 | T1             | T2   | T1      | T2      | T1      | T2      |                  |                  | T1           | T2      | T1      | T2      |
| Schmiegel 2013  | XOB            | XIB  | 67/127  | 67/120  | 103/127 | 101/120 | 0.90 (0.68-1.19) | 0.93 (0.82-1.07) |              |         |         |         |
| Personeni 2013  | LFI            | LFIC | 18/35   | 28/54   |         |         |                  |                  |              |         |         |         |
| Hong 2013       | X              | XO   | 9/40    | 14/40   | 32/40   | 36/40   | 0.67 (0.41-1.10) | 1.33 (0.74-2.37) |              |         |         |         |
| Ducreux 2013    | XIB            | LFIB | 45/72   | 46/73   | 60/72   | 63/73   |                  |                  |              |         | 37/72   | 29/73   |
| Cunningham 2013 | XB             | X    | 27/140  | 14/140  | 104/140 | 81/140  | 0.79 (0.57-1.09) | 0.53 (0.41-0.69) | 81/134       | 60/136  | 40/134  | 42/136  |
| Tveit 2012      | LF             | LFC  | 31/76   | 46/94   |         |         | 1.06 (0.83-1.35) | 0.89 (0.72-1.11) |              |         |         |         |
| Souglakos 2012  | LFIB           | XIB  | 76/167  | 62/166  | 126/167 | 114/166 | 1.08 (0.94-1.24) | 0.99 (0.90-1.09) | 51/167       | 62/166  |         |         |
| Saltz 2012      | LFOB           | LFBC | 61/117  | 49/119  | 102/117 | 99/119  |                  |                  |              |         |         |         |
| Pectasides 2012 | XIB            | LFIB | 55/143  | 57/142  | 85/143  | 98/142  | 0.84 (0.59-1.21) | 0.95 (0.68-1.32) |              |         |         |         |
| Dotan 2012      | XOBC           | XOC  | 4/12    | 8/11    | 11/12   | 11/11   |                  |                  |              |         |         |         |
| Van 2011        | LFIC           | LFI  | 281/599 | 232/599 | 505/599 | 512/599 | 0.88 (0.77-1.00) | 0.85 (0.73-1.00) | 476/600      | 367/602 |         |         |
| Moosmann 2011   | XIC            | XOC  | 41/89   | 42/88   | 66/89   | 68/88   |                  |                  |              |         |         |         |
| Masi 2011       | LFI            | LFOI |         |         |         |         | 0.74 (0.56-0.96) | 0.59 (0.45-0.76) |              |         |         |         |
| Falcone 2007    | LFI            | LFOI | 41/122  | 66/122  | 74/122  | 87/122  |                  |                  |              |         |         |         |
| Guan 2011       | LFIB           | LFI  | 49/139  | 11/64   | 130/130 | 44/64   | 0.62 (0.41-0.95) | 0.44 (0.31-0.63) |              |         |         |         |
| Fischer 2011    | LFI            | IO   | 97/238  | 98/241  | 192/238 | 163/241 | 1.08 (0.88-1.23) | 1.14 (0.94-1.37) |              |         |         |         |
| Ducreux 2011    | XO             | LFO  | 39/156  | 46/150  |         |         | 1.02 (0.80-1.29) | 1.00 (0.79-1.27) |              |         |         |         |
| Cassidy 2011    | LFO            | XO   |         |         |         |         | 0.95 (0.84-1.07) |                  | 506/648      | 468/655 |         |         |
|                 | LFOB           | XOB  |         |         |         |         | 0.95 (0.80-1.13) |                  | 289/342      | 266/353 |         |         |
| Cassidy 2008    | LFO            | XO   |         |         |         |         |                  | 0.96 (0.81-1.13) |              |         |         |         |
|                 | LFOB           | XOB  |         |         |         |         |                  | 1.01 (0.85-1.12) |              |         |         |         |
| Vamvakas 2010   | LFI            | LFOI | 49/146  | 59/137  |         |         | 1.08 (0.80-1.45) | 1.15 (0.86-1.48) |              |         |         |         |
| Souglakos 2006  | LFI            | LFOI |         |         | 88/146  | 102/137 |                  |                  |              |         |         |         |
| Oevirk 2010     | LFOC           | LFIC | 33/77   | 33/74   | 64/77   | 57/74   | 0.98 (0.67-1.44) | 1.06 (0.74-1.52) | 48/77        | 37/74   | 21/77   | 21/74   |
| Tol 2009        | XOB            | XOBC | 184/368 | 194/368 | 346/368 | 348/368 | 1.15 (0.95-1.40) | 1.22 (1.05-1.42) | 269/368      | 301/368 | 268/368 | 299/368 |
| Moehler 2009    | XI             | XIB  | 5/17    | 10/29   | 12/17   | 22/29   |                  |                  | 14/17        | 17/29   |         |         |
| Bokemeyer 2009  | LFO            | LFOC | 60/168  | 77/169  | 136/168 | 144/169 |                  | 0.93 (0.71-1.23) | 117/168      | 129/170 |         |         |
| Aranda 2009     | LFI            | FI   | 98/173  | 88/173  | 142/173 | 137/173 |                  |                  |              |         |         |         |



| Study           | Treatment arms |       | ORR     |         | DCR     |         | OS               | PFS              | AEs grade ≥3 |         | SAEs    |         |
|-----------------|----------------|-------|---------|---------|---------|---------|------------------|------------------|--------------|---------|---------|---------|
|                 | T1             | T2    | T1      | T2      | T1      | T2      |                  |                  | T1           | T2      | T1      | T2      |
| Hochster 2008   | LFO            | XO    | 20/49   | 13/48   | 32/49   | 32/48   |                  |                  | 37/49        | 35/48   |         |         |
|                 | LF             |       | 10/50   |         | 31/50   |         |                  |                  | 22/50        |         |         |         |
|                 | LFOB           | XOB   | 37/71   | 33/72   | 65/71   | 55/72   |                  |                  | 46/71        | 42/72   |         |         |
|                 | LFB            |       | 27/70   |         | 53/70   |         |                  |                  | 42/70        |         |         |         |
| Sobrero 2008    | CI             | I     | 106/648 | 27/650  | 398/648 | 298/650 | 0.98 (0.85-1.14) | 0.69 (0.62-0.78) | 396/638      | 274/629 | 186/638 | 142/629 |
| Rothenberg 2008 | LFO            | XO    | 57/314  | 63/313  |         |         | 1.03 (0.87-1.23) | 0.97 (0.83-1.14) | 262/308      | 198/311 |         |         |
| Heinemann 2008  | XIC            | XOC   | 39/74   | 42/68   | 62/74   | 66/68   |                  |                  |              |         |         |         |
| Haller 2008     | IO             | I     | 70/317  | 23/310  | 248/317 | 169/310 |                  |                  | 227/313      | 179/301 | 100/313 | 99/301  |
| Borner 2008     | XO             | XOC   | 5/37    | 15/37   | 28/37   | 28/37   |                  |                  |              |         |         |         |
| Saltz 2007      | CIB            | CB    | 16/37   | 8/40    |         |         |                  |                  |              |         |         |         |
| Porschen 2007   | XO             | LFO   | 116/241 | 126/233 | 183/241 | 179/233 |                  | 1.17 (0.96-1.43) |              |         |         |         |
| Hospers 2006    | LF             | LFO   | 28/151  | 51/151  | 104/151 | 116/151 |                  |                  | 46/151       | 34/151  |         |         |
| Goldberg 2006   | LFO            | LFI   | 74/154  | 48/151  |         |         | 0.76 (0.60-0.97) | 0.55 (0.43-0.70) |              |         |         |         |
| Polikoff 2005   | LFOC           | LFO   | 9/43    | 4/42    | 29/43   | 30/42   |                  |                  |              |         |         |         |
| NCT00252564     | LFOB           | LFBC  | 61/117  | 49/119  |         |         |                  |                  |              |         | 40/118  | 49/121  |
| Kalofonos 2005  | LFI            | LFO   | 49/147  | 45/142  | 91/147  | 82/142  |                  |                  |              |         |         |         |
| Colucci 2005    | LFI            | LFO   | 56/178  | 62/182  | 124/178 | 128/182 | 1.04 (0.80-1.37) |                  |              |         |         |         |
| Comella 2005    | LFI            | LFO   | 42/135  | 61/139  | 78/135  | 91/139  |                  |                  | 72/135       | 61/139  |         |         |
| Tournigand 2004 | LFI            | LFO   | 61/109  | 59/111  | 86/109  | 89/111  |                  |                  | 58/110       | 81/110  | 15/110  | 5/110   |
|                 | LFO            | LFI   | 12/81   | 3/69    | 51/81   | 24/69   |                  |                  | 40/82        | 30/68   | 3/81    | 4/69    |
| Hurwitz 2004    | LFIB           | LFI   | 180/402 | 143/411 |         |         |                  |                  | 294/397      | 334/393 | 197/397 | 220/393 |
| Goldberg 2004   | LFO            | LFI   | 120/267 | 82/264  |         |         | 0.66 (0.54-0.82) | 0.74 (0.61-0.89) |              |         |         |         |
|                 | IO             | (LFI) | 92/264  |         |         |         | 0.81 (0.66-1.00) | 1.02 (0.85-1.23) |              |         |         |         |
|                 | (LFO)          | (IO)  |         |         |         |         | 0.83 (0.67-1.03) | 0.72 (0.60-0.87) |              |         |         |         |
| Cunningham 2004 | CI             | C     | 50/218  | 12/111  | 121/218 | 36/111  | 0.91 (0.68-1.21) | 0.54 (0.42-0.71) | 138/212      | 50/115  |         |         |
| Rothenberg 2003 | LF             | LFO   | 4/151   | 21/152  | 64/151  | 105/152 |                  |                  | 58/142       | 109/150 |         |         |
|                 | O              |       | 5/156   |         | 62/156  |         |                  |                  | 71/153       |         |         |         |
| Rougier 2002    | LFI            | IO    | 4/35    | 5/33    | 21/35   | 20/33   |                  |                  |              |         |         |         |

| Study           | Treatment arms |      | ORR     |         | DCR     |         | OS               | PFS              | AEs grade ≥3 |       | SAEs   |        |
|-----------------|----------------|------|---------|---------|---------|---------|------------------|------------------|--------------|-------|--------|--------|
|                 | T1             | T2   | T1      | T2      | T1      | T2      |                  |                  | T1           | T2    | T1     | T2     |
|                 | LFO            |      | 7/33    |         | 23/33   |         |                  |                  |              |       |        |        |
| Maiello 2000    | LF             | LFI  | 6/33    | 27/64   | 21/33   | 53/64   |                  |                  |              |       |        |        |
| De Gramont 2000 | LF             | LFO  | 46/210  | 105/210 | 153/210 | 172/210 |                  |                  |              |       |        |        |
| NCT02337946     | LFOP           | LFP  | 45/56   | 50/57   |         |         | 1.41 (0.69-2.88) | 0.93 (0.60-1.43) | 45/56        | 39/54 | 20/56  | 18/54  |
| NCT01374425     | LFOB           | LFIB | 115/188 | 123/188 | 175/188 | 171/188 | 0.76 (0.56-1.04) | 0.79 (0.61-1.01) |              |       | 79/185 | 87/183 |
| NCT01131078     | XIB            | XB   | 47/91   | 63/186  | 83/91   | 154/186 |                  |                  |              |       | 38/100 | 42/201 |
| NCT00778830     | LFIC           | LFOC | 55/101  | 115/188 |         |         |                  |                  |              |       | 37/101 | 64/188 |
| NCT00349336     | XOB            | LFOB |         |         |         |         |                  |                  |              |       | 9/32   | 15/32  |

ORR, overall response rate; DCR, disease control rate; OS, overall survival; PFS, progression-free survival; AE, adverse event; SAE, serious adverse event; X, capecitabine; B, bevacizumab; C, cetuximab; F, 5-fluorouracil; I, irinotecan; L, leucovorin; O, oxaliplatin; P, panitumumab.

**Supplementary Table S3.** Identification of treatment arms included in the network meta-analysis.

| <b>Treatment</b> | <b>No. arms</b> | <b>No. subjects</b> | <b>ORR</b> | <b>DCR</b> | <b>OS</b> | <b>PFS</b> | <b>AEs grade <math>\geq 3</math></b> | <b>SAEs</b> |
|------------------|-----------------|---------------------|------------|------------|-----------|------------|--------------------------------------|-------------|
| X                | 2               | 180                 | Included   | Included   | Included  | Included   | N/c                                  | Included    |
| C                | 6               | 1168                | Included   | Included   | N/c       | N/c        | N/c                                  | N/c         |
| I                | 4               | 1274                | Included   | Included   | N/c       | N/c        | N/c                                  | N/c         |
| O                | 1               | 156                 | Included   | Included   | N/a       | N/a        | Included                             | N/a         |
| P                | 3               | 1110                | Included   | Included   | N/c       | N/c        | N/c                                  | N/c         |
| CB               | 1               | 40                  | Included   | N/a        | N/a       | N/a        | N/a                                  | N/a         |
| CI               | 6               | 995                 | Included   | Included   | N/c       | N/c        | N/c                                  | N/c         |
| CIB              | 2               | 81                  | Included   | Included   | N/c       | N/c        | N/c                                  | N/c         |
| IO               | 4               | 62                  | Included   | Included   | Included  | Included   | N/c                                  | N/c         |
| IOB              | 1               | 73                  | Included   | Included   | Included  | Included   | N/a                                  | N/a         |
| IP               | 2               | 289                 | Included   | Included   | N/c       | N/c        | N/c                                  | N/a         |
| FI               | 1               | 173                 | Included   | Included   | N/a       | N/a        | N/a                                  | N/a         |
| XB               | 2               | 345                 | Included   | Included   | Included  | Included   | N/c                                  | Included    |
| XC               | 1               | 13                  | Included   | Included   | N/a       | N/a        | N/a                                  | N/a         |
| XI               | 1               | 17                  | Included   | Included   | N/a       | N/a        | Included                             | N/a         |
| <b>XIB</b>       | 7               | 684                 | Included   | Included   | Included  | Included   | Included                             | Included    |
| XIC              | 2               | 182                 | Included   | Included   | N/a       | N/a        | N/a                                  | N/a         |
| XO               | 8               | 2169                | Included   | Included   | Included  | Included   | Included                             | N/a         |
| <b>XOB</b>       | 9               | 1594                | Included   | Included   | Included  | Included   | Included                             | Included    |
| XOC              | 4               | 228                 | Included   | Included   | N/a       | N/a        | N/a                                  | N/a         |
| <b>XOBC</b>      | 2               | 380                 | Included   | Included   | Included  | Included   | Included                             | Included    |
| LF               | 7               | 923                 | Included   | Included   | Included  | Included   | Included                             | N/a         |
| LFB              | 1               | 70                  | Included   | Included   | N/a       | N/a        | Included                             | N/a         |
| LFC              | 1               | 194                 | Included   | N/a        | Included  | Included   | N/a                                  | N/a         |
| LFBC             | 2               | 246                 | Included   | Included   | N/a       | N/a        | N/a                                  | Included    |
| LFP              | 3               | 267                 | Included   | N/a        | Included  | Included   | Included                             | Included    |
| <b>LFI</b>       | 31              | 5444                | Included   | Included   | Included  | Included   | Included                             | Included    |
| <b>LFIB</b>      | 13              | 2146                | Included   | Included   | Included  | Included   | Included                             | Included    |
| <b>LFIC</b>      | 8               | 1261                | Included   | Included   | Included  | Included   | Included                             | Included    |
| <b>LFIP</b>      | 8               | 1812                | Included   | Included   | Included  | Included   | Included                             | Included    |
| LFIBP            | 3               | 194                 | Included   | Included   | Included  | Included   | Included                             | N/a         |
| <b>LFO</b>       | 26              | 5193                | Included   | Included   | Included  | Included   | Included                             | Included    |
| <b>LFOB</b>      | 20              | 2661                | Included   | Included   | Included  | Included   | Included                             | Included    |
| <b>LFOC</b>      | 10              | 1108                | Included   | Included   | Included  | Included   | Included                             | Included    |
| <b>LFOF</b>      | 6               | 874                 | Included   | Included   | Included  | Included   | Included                             | Included    |
| LFOI             | 8               | 661                 | Included   | Included   | Included  | Included   | N/a                                  | N/c         |
| <b>LFOIB</b>     | 7               | 1033                | Included   | Included   | Included  | Included   | Included                             | Included    |
| LFOIC            | 2               | 93                  | Included   | N/a        | N/a       | N/a        | N/a                                  | N/a         |

| <b>Treatment</b> | <b>No. arms</b> | <b>No. subjects</b> | <b>ORR</b> | <b>DCR</b> | <b>OS</b> | <b>PFS</b> | <b>AEs grade <math>\geq 3</math></b> | <b>SAEs</b> |
|------------------|-----------------|---------------------|------------|------------|-----------|------------|--------------------------------------|-------------|
| LFOIP            | 1               | 63                  | Included   | Included   | N/a       | Included   | N/a                                  | N/c         |

ORR, overall response rate; DCR, disease control rate; OS, overall survival; PFS, progression-free survival; AEs, adverse events; SAEs, serious adverse events; X, capecitabine; B, bevacizumab; C, cetuximab; F, 5-fluorouracil; I, irinotecan; L, leucovorin; O, oxaliplatin; P, panitumumab; N/a, not available; N/c. not contributed. Bold fonts indicate treatments are available for all the outcomes.

**Supplementary Table S4.** Odds ratios and 95% credible intervals for pairwise estimates of overall response rate and disease control rate.

| T1  | T2    | Overall response rate   |                         |                         | Disease control rate    |                         |                         |
|-----|-------|-------------------------|-------------------------|-------------------------|-------------------------|-------------------------|-------------------------|
|     |       | Fixed effects           | Random effects          | Meta-regression         | Fixed effects           | Random effects          | Meta-regression         |
| LFI | LFIB  | <b>1.51 (1.27-1.78)</b> | <b>1.49 (1.11-1.96)</b> | 1.40 (1.00-1.89)        | <b>2.51 (1.80-3.41)</b> | <b>3.28 (1.87-5.56)</b> | <b>2.26 (1.29-3.95)</b> |
| LFI | LFIC  | <b>1.62 (1.35-1.93)</b> | <b>1.80 (1.24-2.56)</b> | <b>1.75 (1.20-2.50)</b> | 1.06 (0.80-1.37)        | 1.21 (0.63-2.11)        | 1.02 (0.58-1.69)        |
| LFI | LFIP  | <b>2.96 (2.21-3.88)</b> | <b>2.94 (1.91-4.36)</b> | <b>2.48 (1.39-4.08)</b> | <b>1.42 (1.10-1.80)</b> | 1.46 (0.80-2.44)        | 0.83 (0.40-1.58)        |
| LFI | LFIBP | <b>1.76 (1.15-2.60)</b> | <b>1.89 (1.04-3.21)</b> | 1.47 (0.63-2.94)        | <b>1.86 (1.23-2.72)</b> | 2.23 (1.09-4.18)        | 1.12 (0.45-2.47)        |
| LFI | LFO   | <b>1.30 (1.12-1.50)</b> | <b>1.31 (1.04-1.65)</b> | 1.27 (0.99-1.61)        | <b>1.28 (1.04-1.55)</b> | 1.41 (0.98-2.00)        | 1.20 (0.85-1.68)        |
| LFI | LFOB  | <b>1.53 (1.22-1.89)</b> | <b>1.54 (1.08-2.14)</b> | <b>1.47 (1.01-2.07)</b> | <b>2.25 (1.40-3.45)</b> | <b>2.97 (1.39-5.77)</b> | <b>2.17 (1.07-4.15)</b> |
| LFI | LFOC  | <b>2.54 (1.98-3.22)</b> | <b>2.68 (1.81-3.86)</b> | <b>2.60 (1.74-3.76)</b> | <b>1.65 (1.11-2.38)</b> | 1.90 (0.98-3.42)        | 1.60 (0.88-2.73)        |
| LFI | LFOP  | <b>1.74 (1.35-2.22)</b> | <b>1.86 (1.19-2.83)</b> | <b>1.77 (1.10-2.70)</b> | <b>1.57 (1.08-2.20)</b> | 2.02 (0.98-3.83)        | 1.61 (0.86-2.90)        |
| LFI | LFOI  | <b>1.64 (1.19-2.22)</b> | 1.60 (0.98-2.46)        | 1.58 (0.97-2.43)        | <b>1.81 (1.25-2.55)</b> | 1.94 (0.96-3.56)        | 1.84 (1.01-3.13)        |
| LFI | LFOIB | <b>2.57 (1.92-3.38)</b> | <b>2.66 (1.67-4.05)</b> | <b>2.55 (1.58-3.91)</b> | <b>4.14 (1.93-7.96)</b> | <b>5.15 (1.66-12.6)</b> | <b>4.17 (1.50-9.70)</b> |
| LFI | LFOIC | <b>4.61 (1.46-11.4)</b> | <b>4.73 (1.32-12.6)</b> | <b>4.63 (1.28-12.3)</b> | -                       | -                       | -                       |
| LFI | LFOIP | <b>9.82 (3.01-24.9)</b> | <b>9.97 (2.37-28.7)</b> | <b>9.81 (2.35-28.2)</b> | <b>31.0 (3.40-136)</b>  | <b>36.1 (2.60-176)</b>  | <b>32.4 (2.82-157)</b>  |
| LFI | LF    | <b>0.39 (0.29-0.50)</b> | <b>0.39 (0.26-0.57)</b> | <b>0.38 (0.25-0.56)</b> | <b>0.62 (0.47-0.81)</b> | 0.69 (0.41-1.09)        | <b>0.60 (0.38-0.92)</b> |
| LFI | LFB   | 0.91 (0.45-1.63)        | 0.95 (0.37-2.04)        | 0.91 (0.34-1.95)        | 0.97 (0.37-2.11)        | 1.29 (0.30-3.74)        | 0.92 (0.25-2.53)        |
| LFI | LFC   | 0.57 (0.28-1.05)        | 0.60 (0.21-1.36)        | 0.59 (0.21-1.33)        | -                       | -                       | -                       |
| LFI | LFBC  | 0.99 (0.63-1.48)        | 1.03 (0.51-1.85)        | 0.98 (0.48-1.79)        | 1.74 (0.66-3.72)        | 2.52 (0.55-7.63)        | 1.78 (0.45-5.05)        |
| LFI | LFP   | 1.60 (0.87-2.72)        | 1.88 (0.78-3.91)        | 1.79 (0.73-3.75)        | -                       | -                       | -                       |
| LFI | CB    | 0.71 (0.15-2.09)        | 1.08 (0.13-4.10)        | 1.01 (0.13-3.83)        | -                       | -                       | -                       |
| LFI | CI    | 1.64 (0.82-2.94)        | 2.07 (0.68-4.93)        | 1.93 (0.63-4.64)        | <b>0.64 (0.40-0.98)</b> | 0.97 (0.29-2.51)        | 0.58 (0.20-1.46)        |
| LFI | CIB   | 1.97 (0.79-4.09)        | 2.85 (0.70-8.18)        | 2.68 (0.65-7.70)        | 0.73 (0.31-1.46)        | 1.27 (0.24-4.13)        | 0.73 (0.17-2.27)        |
| LFI | IO    | 1.04 (0.82-1.30)        | 1.11 (0.72-1.65)        | 1.07 (0.69-1.60)        | 0.78 (0.55-1.06)        | 0.90 (0.46-1.63)        | 0.67 (0.35-1.19)        |
| LFI | IOB   | 1.30 (0.56-2.60)        | 1.38 (0.44-3.26)        | 1.31 (0.42-3.13)        | 0.56 (0.13-1.48)        | 0.81 (0.12-2.76)        | 0.57 (0.10-1.87)        |
| LFI | IP    | 1.38 (0.67-2.52)        | 1.72 (0.57-4.12)        | 1.60 (0.52-3.88)        | <b>0.45 (0.26-0.74)</b> | 0.66 (0.19-1.73)        | 0.40 (0.13-1.01)        |
| LFI | FI    | 0.81 (0.52-1.21)        | 0.85 (0.39-1.61)        | 0.85 (0.39-1.62)        | 0.86 (0.48-1.42)        | 0.94 (0.31-2.24)        | 0.91 (0.35-1.95)        |
| LFI | XB    | 0.71 (0.39-1.17)        | 0.76 (0.32-1.55)        | 0.73 (0.30-1.48)        | 0.86 (0.35-1.73)        | 1.12 (0.29-3.01)        | 0.80 (0.24-2.02)        |
| LFI | XC    | 37.5 (0.26-113)         | 56.5 (0.24-142)         | 27.0 (0.22-136)         | 0.80 (0.08-3.36)        | 1.50 (0.07-7.78)        | 0.82 (0.05-4.12)        |
| LFI | XI    | 1.25 (0.24-3.76)        | 1.33 (0.21-4.47)        | 1.26 (0.19-4.22)        | 1.66 (0.29-5.48)        | 2.31 (0.26-9.23)        | 1.58 (0.20-5.95)        |
| LFI | XIB   | 1.30 (0.95-1.74)        | 1.33 (0.81-2.05)        | 1.25 (0.75-1.96)        | <b>1.66 (1.06-2.50)</b> | 2.11 (0.96-4.15)        | 1.49 (0.72-2.90)        |
| LFI | XIC   | <b>5.48 (1.54-14.7)</b> | <b>5.62 (1.22-17.1)</b> | <b>5.45 (1.17-16.6)</b> | 0.93 (0.21-2.69)        | 1.10 (0.13-4.24)        | 0.88 (0.13-3.09)        |
| LFI | XO    | 1.08 (0.82-1.39)        | 1.05 (0.67-1.56)        | 1.02 (0.64-1.52)        | 1.17 (0.77-1.72)        | 1.34 (0.61-2.62)        | 1.11 (0.55-2.06)        |
| LFI | XOB   | 1.19 (0.79-1.70)        | 1.21 (0.68-2.01)        | 1.15 (0.63-1.93)        | 1.15 (0.58-2.05)        | 1.48 (0.50-3.47)        | 1.05 (0.40-2.38)        |
| LFI | XOC   | <b>6.53 (2.08-16.5)</b> | <b>6.62 (1.75-18.4)</b> | <b>6.41 (1.68-17.8)</b> | 1.55 (0.43-4.05)        | 2.05 (0.35-6.91)        | 1.59 (0.33-4.99)        |
| LFI | XOBC  | 1.33 (0.80-2.07)        | 1.36 (0.56-2.79)        | 1.30 (0.53-2.67)        | 1.28 (0.48-2.78)        | 1.65 (0.33-5.09)        | 1.18 (0.28-3.42)        |
| LFI | X     | <b>0.40 (0.19-0.76)</b> | <b>0.44 (0.16-0.96)</b> | <b>0.42 (0.15-0.93)</b> | <b>0.43 (0.16-0.89)</b> | 0.57 (0.14-1.60)        | 0.42 (0.11-1.10)        |
| LFI | C     | 0.58 (0.21-1.26)        | 0.70 (0.16-2.01)        | 0.66 (0.15-1.88)        | <b>0.26 (0.13-0.47)</b> | 0.45 (0.10-1.38)        | 0.26 (0.07-0.77)        |
| LFI | I     | <b>0.35 (0.20-0.55)</b> | <b>0.42 (0.18-0.84)</b> | <b>0.39 (0.17-0.78)</b> | <b>0.34 (0.22-0.49)</b> | <b>0.47 (0.20-0.95)</b> | <b>0.29 (0.13-0.60)</b> |
| LFI | O     | <b>0.32 (0.09-0.73)</b> | <b>0.35 (0.09-0.88)</b> | <b>0.34 (0.08-0.87)</b> | <b>0.47 (0.29-0.72)</b> | 0.55 (0.20-1.23)        | <b>0.47 (0.20-0.96)</b> |

| T1   | T2    | Overall response rate   |                         |                         | Disease control rate    |                         |                         |
|------|-------|-------------------------|-------------------------|-------------------------|-------------------------|-------------------------|-------------------------|
|      |       | Fixed effects           | Random effects          | Meta-regression         | Fixed effects           | Random effects          | Meta-regression         |
| LF1  | P     | 0.67 (0.23-1.52)        | 0.85 (0.16-2.71)        | 0.80 (0.15-2.53)        | <b>0.27 (0.13-0.50)</b> | 0.50 (0.08-1.80)        | <b>0.28 (0.06-0.94)</b> |
| LFIB | LFIC  | 1.08 (0.87-1.32)        | 1.22 (0.81-1.80)        | 1.27 (0.84-1.89)        | <b>0.43 (0.30-0.59)</b> | <b>0.38 (0.18-0.69)</b> | <b>0.47 (0.24-0.80)</b> |
| LFIB | LFIP  | <b>1.97 (1.44-2.65)</b> | <b>2.00 (1.26-3.05)</b> | <b>1.78 (1.05-2.84)</b> | <b>0.58 (0.40-0.82)</b> | <b>0.47 (0.23-0.82)</b> | <b>0.38 (0.19-0.65)</b> |
| LFIB | LFIBP | 1.18 (0.74-1.79)        | 1.30 (0.66-2.33)        | 1.06 (0.47-2.10)        | 0.76 (0.44-1.22)        | 0.73 (0.28-1.56)        | 0.51 (0.21-1.07)        |
| LFIB | LFO   | 0.87 (0.70-1.05)        | 0.90 (0.64-1.23)        | 0.93 (0.66-1.28)        | <b>0.52 (0.36-0.73)</b> | <b>0.46 (0.24-0.79)</b> | <b>0.57 (0.31-0.93)</b> |
| LFIB | LFOB  | 1.02 (0.83-1.23)        | 1.04 (0.75-1.42)        | 1.06 (0.76-1.45)        | 0.91 (0.59-1.34)        | 0.92 (0.47-1.63)        | 0.98 (0.54-1.64)        |
| LFIB | LFOC  | <b>1.70 (1.29-2.20)</b> | <b>1.82 (1.17-2.74)</b> | <b>1.88 (1.20-2.86)</b> | 0.67 (0.41-1.05)        | 0.61 (0.27-1.20)        | 0.75 (0.35-1.38)        |
| LFIB | LFOP  | 1.16 (0.87-1.52)        | 1.26 (0.78-1.99)        | 1.28 (0.78-2.01)        | <b>0.64 (0.40-0.97)</b> | 0.65 (0.28-1.29)        | 0.75 (0.35-1.38)        |
| LFIB | LFOI  | 1.10 (0.77-1.52)        | 1.09 (0.63-1.76)        | 1.15 (0.66-1.86)        | 0.74 (0.45-1.15)        | 0.63 (0.25-1.29)        | 0.87 (0.37-1.68)        |
| LFIB | LFOIB | <b>1.71 (1.31-2.20)</b> | <b>1.80 (1.16-2.68)</b> | <b>1.83 (1.18-2.75)</b> | 1.68 (0.77-3.24)        | 1.64 (0.51-3.98)        | 1.92 (0.66-4.38)        |
| LFIB | LFOIC | 3.08 (0.97-7.67)        | 3.22 (0.88-8.66)        | 3.36 (0.91-9.11)        | -                       | -                       | -                       |
| LFIB | LFOIP | <b>6.56 (1.99-16.7)</b> | <b>6.79 (1.58-19.9)</b> | <b>7.13 (1.66-20.9)</b> | <b>12.7 (1.33-56.4)</b> | 11.7 (0.76-58.0)        | <b>15.4 (1.20-76.6)</b> |
| LFIB | LF    | <b>0.26 (0.19-0.35)</b> | <b>0.27 (0.16-0.41)</b> | <b>0.28 (0.17-0.44)</b> | <b>0.26 (0.17-0.37)</b> | <b>0.22 (0.10-0.42)</b> | <b>0.29 (0.14-0.50)</b> |
| LFIB | LFB   | 0.61 (0.31-1.08)        | 0.64 (0.25-1.36)        | 0.65 (0.25-1.39)        | <b>0.39 (0.15-0.82)</b> | 0.40 (0.10-1.09)        | 0.41 (0.12-1.05)        |
| LFIB | LFC   | <b>0.38 (0.18-0.71)</b> | <b>0.41 (0.14-0.96)</b> | 0.43 (0.14-1.00)        | -                       | -                       | -                       |
| LFIB | LFBC  | <b>0.66 (0.43-0.98)</b> | 0.69 (0.35-1.24)        | 0.71 (0.35-1.27)        | 0.70 (0.27-1.48)        | 0.78 (0.18-2.26)        | 0.80 (0.22-2.10)        |
| LFIB | LFP   | 1.07 (0.57-1.83)        | 1.28 (0.52-2.70)        | 1.30 (0.52-2.77)        | -                       | -                       | -                       |
| LFIB | CB    | 0.47 (0.10-1.40)        | 0.74 (0.09-2.84)        | 0.74 (0.09-2.83)        | -                       | -                       | -                       |
| LFIB | CI    | 1.10 (0.53-2.00)        | 1.41 (0.45-3.49)        | 1.41 (0.44-3.46)        | <b>0.26 (0.15-0.44)</b> | <b>0.32 (0.08-0.87)</b> | <b>0.27 (0.08-0.66)</b> |
| LFIB | CIB   | 1.31 (0.52-2.78)        | 1.95 (0.46-5.71)        | 1.95 (0.46-5.73)        | <b>0.30 (0.12-0.63)</b> | 0.41 (0.07-1.40)        | 0.34 (0.07-1.02)        |
| LFIB | IO    | <b>0.69 (0.52-0.91)</b> | 0.76 (0.45-1.21)        | 0.78 (0.46-1.26)        | <b>0.32 (0.20-0.49)</b> | <b>0.29 (0.12-0.61)</b> | <b>0.31 (0.14-0.60)</b> |
| LFIB | IOB   | 0.87 (0.37-1.73)        | 0.93 (0.30-2.20)        | 0.94 (0.31-2.24)        | <b>0.23 (0.05-0.59)</b> | <b>0.25 (0.04-0.83)</b> | <b>0.26 (0.05-0.79)</b> |
| LFIB | IP    | 0.92 (0.44-1.72)        | 1.18 (0.37-2.91)        | 1.17 (0.36-2.89)        | <b>0.19 (0.10-0.33)</b> | <b>0.22 (0.05-0.60)</b> | <b>0.19 (0.06-0.46)</b> |
| LFIB | FI    | <b>0.54 (0.33-0.83)</b> | 0.58 (0.25-1.16)        | 0.62 (0.26-1.26)        | <b>0.35 (0.18-0.62)</b> | <b>0.31 (0.08-0.79)</b> | 0.44 (0.13-1.02)        |
| LFIB | XB    | <b>0.47 (0.27-0.77)</b> | 0.52 (0.22-1.03)        | 0.52 (0.23-1.05)        | <b>0.35 (0.15-0.67)</b> | <b>0.35 (0.10-0.89)</b> | <b>0.36 (0.12-0.85)</b> |
| LFIB | XC    | 24.1 (0.17-75.7)        | 38.6 (0.16-96.2)        | 19.3 (0.16-98.1)        | 0.33 (0.03-1.39)        | 0.49 (0.02-2.56)        | 0.38 (0.02-1.89)        |
| LFIB | XI    | 0.83 (0.16-2.49)        | 0.89 (0.14-2.96)        | 0.90 (0.14-2.98)        | 0.66 (0.12-2.15)        | 0.71 (0.09-2.71)        | 0.70 (0.10-2.53)        |
| LFIB | XIB   | 0.86 (0.66-1.11)        | 0.89 (0.59-1.29)        | 0.89 (0.59-1.30)        | <b>0.66 (0.48-0.89)</b> | 0.65 (0.36-1.07)        | 0.66 (0.40-1.03)        |
| LFIB | XIC   | <b>3.66 (1.02-9.82)</b> | 3.82 (0.82-11.7)        | 3.94 (0.84-12.1)        | 0.38 (0.08-1.12)        | 0.35 (0.04-1.39)        | 0.41 (0.06-1.46)        |
| LFIB | XO    | <b>0.72 (0.53-0.96)</b> | 0.71 (0.43-1.11)        | 0.74 (0.44-1.16)        | <b>0.48 (0.28-0.76)</b> | <b>0.43 (0.17-0.91)</b> | 0.52 (0.22-1.02)        |
| LFIB | XOB   | 0.79 (0.54-1.11)        | 0.82 (0.47-1.31)        | 0.82 (0.48-1.34)        | <b>0.46 (0.25-0.78)</b> | <b>0.46 (0.17-0.97)</b> | <b>0.47 (0.20-0.94)</b> |
| LFIB | XOC   | <b>4.36 (1.38-11.0)</b> | <b>4.50 (1.18-12.6)</b> | <b>4.64 (1.20-13.0)</b> | 0.63 (0.17-1.69)        | 0.66 (0.11-2.25)        | 0.74 (0.14-2.34)        |
| LFIB | XOBC  | 0.88 (0.54-1.36)        | 0.92 (0.39-1.85)        | 0.93 (0.39-1.89)        | 0.51 (0.20-1.08)        | 0.51 (0.11-1.49)        | 0.53 (0.14-1.41)        |
| LFIB | X     | <b>0.27 (0.13-0.50)</b> | <b>0.30 (0.11-0.65)</b> | <b>0.30 (0.11-0.67)</b> | <b>0.17 (0.07-0.35)</b> | <b>0.18 (0.04-0.49)</b> | <b>0.19 (0.05-0.48)</b> |
| LFIB | C     | <b>0.39 (0.14-0.85)</b> | 0.48 (0.11-1.41)        | 0.48 (0.11-1.39)        | <b>0.11 (0.05-0.20)</b> | <b>0.15 (0.03-0.47)</b> | <b>0.12 (0.03-0.35)</b> |
| LFIB | I     | <b>0.23 (0.13-0.37)</b> | <b>0.29 (0.12-0.60)</b> | <b>0.28 (0.12-0.59)</b> | <b>0.14 (0.08-0.22)</b> | <b>0.15 (0.05-0.35)</b> | <b>0.13 (0.05-0.28)</b> |
| LFIB | O     | <b>0.21 (0.06-0.49)</b> | <b>0.24 (0.06-0.61)</b> | <b>0.24 (0.06-0.65)</b> | <b>0.19 (0.11-0.32)</b> | <b>0.18 (0.05-0.43)</b> | <b>0.22 (0.08-0.48)</b> |
| LFIB | P     | 0.45 (0.15-1.03)        | 0.58 (0.10-1.89)        | 0.58 (0.11-1.87)        | <b>0.11 (0.05-0.22)</b> | <b>0.16 (0.02-0.60)</b> | <b>0.13 (0.02-0.42)</b> |
| LFIC | LFIP  | <b>1.84 (1.31-2.51)</b> | 1.69 (0.96-2.75)        | 1.45 (0.75-2.52)        | 1.37 (0.95-1.91)        | 1.32 (0.56-2.64)        | 0.85 (0.38-1.71)        |
| LFIC | LFIBP | 1.10 (0.69-1.67)        | 1.09 (0.53-2.01)        | 0.86 (0.35-1.80)        | <b>1.79 (1.08-2.81)</b> | 2.04 (0.75-4.58)        | 1.15 (0.42-2.69)        |

| T1   | T2    | Overall response rate   |                         |                         | Disease control rate    |                         |                         |
|------|-------|-------------------------|-------------------------|-------------------------|-------------------------|-------------------------|-------------------------|
|      |       | Fixed effects           | Random effects          | Meta-regression         | Fixed effects           | Random effects          | Meta-regression         |
| LFIC | LFO   | <b>0.80 (0.65-0.99)</b> | 0.75 (0.50-1.08)        | 0.75 (0.50-1.07)        | 1.23 (0.89-1.66)        | 1.27 (0.64-2.30)        | 1.25 (0.70-2.10)        |
| LFIC | LFOB  | 0.95 (0.73-1.21)        | 0.88 (0.55-1.33)        | 0.86 (0.53-1.31)        | <b>2.15 (1.29-3.39)</b> | <b>2.65 (1.07-5.67)</b> | <b>2.23 (1.01-4.50)</b> |
| LFIC | LFOC  | <b>1.58 (1.22-2.01)</b> | <b>1.51 (1.01-2.18)</b> | <b>1.51 (1.01-2.17)</b> | <b>1.58 (1.02-2.35)</b> | 1.67 (0.80-3.15)        | 1.63 (0.85-2.88)        |
| LFIC | LFOP  | 1.08 (0.80-1.43)        | 1.06 (0.61-1.75)        | 1.04 (0.59-1.70)        | 1.51 (0.96-2.25)        | 1.82 (0.72-3.93)        | 1.67 (0.76-3.31)        |
| LFIC | LFOI  | 1.02 (0.71-1.44)        | 0.92 (0.50-1.53)        | 0.93 (0.50-1.56)        | <b>1.74 (1.09-2.64)</b> | 1.76 (0.66-3.85)        | 1.93 (0.83-3.81)        |
| LFIC | LFOIB | 1.60 (1.16-2.16)        | 1.52 (0.86-2.48)        | 1.50 (0.84-2.44)        | <b>3.98 (1.78-7.82)</b> | <b>4.64 (1.27-12.3)</b> | <b>4.33 (1.39-10.7)</b> |
| LFIC | LFOIC | 2.86 (0.91-7.09)        | 2.68 (0.75-7.10)        | 2.69 (0.75-7.15)        | -                       | -                       | -                       |
| LFIC | LFOIP | <b>6.11 (1.85-15.6)</b> | <b>5.71 (1.28-16.9)</b> | <b>5.77 (1.31-17.0)</b> | <b>29.8 (3.17-132)</b>  | <b>32.8 (2.05-166)</b>  | <b>33.9 (2.69-170)</b>  |
| LFIC | LF    | <b>0.24 (0.17-0.33)</b> | <b>0.22 (0.13-0.36)</b> | <b>0.23 (0.13-0.36)</b> | 0.60 (0.41-0.85)        | 0.62 (0.28-1.22)        | 0.63 (0.32-1.14)        |
| LFIC | LFB   | 0.57 (0.28-1.03)        | 0.54 (0.20-1.20)        | 0.53 (0.19-1.17)        | <b>0.93 (0.35-2.03)</b> | 1.15 (0.24-3.49)        | 0.94 (0.24-2.64)        |
| LFIC | LFC   | 0.35 (0.17-0.66)        | 0.34 (0.11-0.81)        | 0.35 (0.11-0.82)        | -                       | -                       | -                       |
| LFIC | LFBC  | <b>0.62 (0.38-0.94)</b> | 0.59 (0.27-1.10)        | 0.57 (0.26-1.09)        | 1.67 (0.62-3.61)        | 2.25 (0.44-7.11)        | 1.82 (0.44-5.27)        |
| LFIC | LFP   | 0.99 (0.53-1.71)        | 1.08 (0.42-2.32)        | 1.05 (0.40-2.28)        | -                       | -                       | -                       |
| LFIC | CB    | 0.44 (0.09-1.31)        | 0.62 (0.07-2.39)        | 0.59 (0.07-2.29)        | -                       | -                       | -                       |
| LFIC | CI    | 1.02 (0.50-1.86)        | 1.19 (0.36-2.94)        | 1.14 (0.35-2.82)        | 0.62 (0.35-1.00)        | 0.88 (0.22-2.54)        | 0.61 (0.18-1.60)        |
| LFIC | CIB   | 1.22 (0.48-2.59)        | 1.64 (0.38-4.82)        | 1.58 (0.36-4.65)        | 0.70 (0.28-1.46)        | 1.16 (0.19-4.04)        | 0.76 (0.16-2.43)        |
| LFIC | IO    | <b>0.64 (0.48-0.85)</b> | 0.64 (0.36-1.05)        | 0.63 (0.35-1.04)        | 0.75 (0.48-1.11)        | 0.82 (0.31-1.79)        | 0.70 (0.30-1.40)        |
| LFIC | IOB   | 0.81 (0.34-1.63)        | 0.78 (0.24-1.91)        | 0.77 (0.23-1.88)        | 0.54 (0.13-1.43)        | 0.72 (0.10-2.56)        | 0.59 (0.10-1.94)        |
| LFIC | IP    | 0.86 (0.41-1.60)        | 0.99 (0.30-2.45)        | 0.94 (0.28-2.36)        | <b>0.44 (0.23-0.75)</b> | 0.60 (0.14-1.74)        | 0.42 (0.12-1.10)        |
| LFIC | FI    | <b>0.50 (0.31-0.78)</b> | <b>0.49 (0.20-0.99)</b> | 0.50 (0.20-1.02)        | 0.83 (0.43-1.44)        | 0.86 (0.22-2.30)        | 0.96 (0.30-2.28)        |
| LFIC | XB    | <b>0.44 (0.24-0.74)</b> | <b>0.44 (0.17-0.92)</b> | <b>0.43 (0.17-0.90)</b> | 0.83 (0.33-1.67)        | 1.00 (0.24-2.83)        | 0.83 (0.23-2.14)        |
| LFIC | XC    | 22.7 (0.16-70.5)        | 33.4 (0.13-81.6)        | 15.6 (0.12-80.1)        | 0.77 (0.07-3.25)        | 1.36 (0.06-7.29)        | 0.85 (0.05-4.33)        |
| LFIC | XI    | 0.77 (0.15-2.34)        | 0.76 (0.11-2.57)        | 0.74 (0.11-2.50)        | 1.58 (0.28-5.26)        | 2.05 (0.21-8.39)        | 1.61 (0.20-6.14)        |
| LFIC | XIB   | 0.81 (0.57-1.10)        | 0.76 (0.42-1.24)        | 0.73 (0.40-1.21)        | 1.59 (0.99-2.42)        | 1.88 (0.75-4.01)        | 1.52 (0.69-3.05)        |
| LFIC | XIC   | 3.40 (0.94-9.19)        | 3.21 (0.66-9.93)        | 3.20 (0.65-9.92)        | 0.89 (0.20-2.63)        | 0.99 (0.11-3.98)        | 0.91 (0.13-3.28)        |
| LFIC | XO    | <b>0.67 (0.49-0.90)</b> | <b>0.60 (0.34-0.97)</b> | <b>0.60 (0.34-0.96)</b> | 1.13 (0.69-1.76)        | 1.20 (0.44-2.69)        | 1.16 (0.49-2.36)        |
| LFIC | XOB   | 0.74 (0.48-1.08)        | 0.69 (0.35-1.21)        | 0.67 (0.34-1.19)        | 1.10 (0.55-1.99)        | 1.31 (0.40-3.29)        | 1.08 (0.38-2.50)        |
| LFIC | XOC   | 4.06 (1.27-10.3)        | 3.79 (0.95-10.8)        | 3.76 (0.94-10.7)        | 1.49 (0.41-3.96)        | 1.84 (0.28-6.55)        | 1.65 (0.31-5.34)        |
| LFIC | XOBC  | 0.82 (0.49-1.30)        | 0.78 (0.30-1.65)        | 0.76 (0.29-1.62)        | 1.22 (0.45-2.69)        | 1.47 (0.26-4.72)        | 1.21 (0.28-3.55)        |
| LFIC | X     | <b>0.25 (0.11-0.47)</b> | <b>0.25 (0.09-0.57)</b> | <b>0.25 (0.08-0.56)</b> | <b>0.41 (0.15-0.87)</b> | 0.51 (0.11-1.52)        | 0.43 (0.11-1.17)        |
| LFIC | C     | <b>0.36 (0.13-0.79)</b> | 0.40 (0.09-1.19)        | 0.39 (0.08-1.13)        | <b>0.25 (0.12-0.47)</b> | 0.41 (0.08-1.35)        | <b>0.27 (0.06-0.83)</b> |
| LFIC | I     | <b>0.22 (0.12-0.35)</b> | <b>0.24 (0.10-0.51)</b> | <b>0.23 (0.09-0.48)</b> | <b>0.32 (0.19-0.51)</b> | 0.42 (0.14-1.01)        | <b>0.30 (0.11-0.67)</b> |
| LFIC | O     | <b>0.20 (0.06-0.46)</b> | <b>0.20 (0.05-0.52)</b> | <b>0.20 (0.05-0.52)</b> | <b>0.45 (0.26-0.73)</b> | 0.50 (0.15-1.24)        | 0.48 (0.18-1.08)        |
| LFIC | P     | <b>0.42 (0.14-0.96)</b> | 0.49 (0.08-1.59)        | 0.47 (0.08-1.52)        | <b>0.26 (0.12-0.50)</b> | 0.46 (0.06-1.75)        | 0.29 (0.05-1.01)        |
| LFIP | LFIBP | <b>0.61 (0.36-0.97)</b> | 0.67 (0.32-1.28)        | 0.61 (0.28-1.18)        | 1.33 (0.81-2.07)        | 1.66 (0.63-3.64)        | 1.41 (0.62-2.89)        |
| LFIP | LFO   | <b>0.45 (0.32-0.60)</b> | <b>0.47 (0.29-0.71)</b> | <b>0.55 (0.31-0.91)</b> | 0.91 (0.66-1.23)        | 1.04 (0.52-1.90)        | 1.61 (0.77-2.93)        |
| LFIP | LFOB  | <b>0.53 (0.37-0.73)</b> | <b>0.54 (0.32-0.86)</b> | 0.63 (0.35-1.06)        | 1.61 (0.95-2.55)        | 2.16 (0.88-4.61)        | 2.85 (1.21-5.77)        |
| LFIP | LFOC  | 0.88 (0.60-1.24)        | 0.95 (0.53-1.57)        | 1.12 (0.58-1.98)        | 1.18 (0.74-1.81)        | 1.40 (0.58-2.93)        | 2.14 (0.88-4.36)        |
| LFIP | LFOP  | <b>0.60 (0.41-0.84)</b> | 0.66 (0.37-1.09)        | 0.76 (0.40-1.32)        | 1.12 (0.72-1.67)        | 1.49 (0.59-3.23)        | 2.14 (0.88-4.42)        |
| LFIP | LFOI  | <b>0.57 (0.37-0.84)</b> | <b>0.57 (0.29-0.99)</b> | 0.68 (0.32-1.28)        | 1.29 (0.82-1.94)        | 1.44 (0.56-3.07)        | 2.50 (0.93-5.30)        |

| T1    | T2    | Overall response rate   |                         |                         | Disease control rate    |                         |                         |
|-------|-------|-------------------------|-------------------------|-------------------------|-------------------------|-------------------------|-------------------------|
|       |       | Fixed effects           | Random effects          | Meta-regression         | Fixed effects           | Random effects          | Meta-regression         |
| LFIP  | LFOIB | 0.89 (0.59-1.28)        | 0.94 (0.51-1.59)        | 1.10 (0.55-1.95)        | <b>2.96 (1.32-5.82)</b> | <b>3.78 (1.07-9.95)</b> | <b>5.55 (1.66-13.9)</b> |
| LFIP  | LFOIC | 1.59 (0.48-4.04)        | 1.68 (0.43-4.64)        | 2.01 (0.48-5.75)        | -                       | -                       | -                       |
| LFIP  | LFOIP | 3.39 (1.00-8.80)        | 3.53 (0.77-10.5)        | 4.25 (0.89-13.0)        | <b>22.2 (2.37-98.4)</b> | <b>26.8 (1.73-133)</b>  | <b>43.9 (3.22-219)</b>  |
| LFIP  | LF    | <b>0.13 (0.09-0.19)</b> | <b>0.14 (0.08-0.23)</b> | <b>0.17 (0.08-0.30)</b> | <b>0.45 (0.30-0.63)</b> | <b>0.51 (0.23-0.99)</b> | 0.82 (0.35-1.58)        |
| LFIP  | LFB   | <b>0.31 (0.15-0.59)</b> | <b>0.34 (0.12-0.76)</b> | <b>0.39 (0.13-0.90)</b> | 0.69 (0.26-1.52)        | 0.94 (0.20-2.84)        | 1.20 (0.29-3.36)        |
| LFIP  | LFC   | <b>0.20 (0.09-0.38)</b> | <b>0.21 (0.07-0.51)</b> | <b>0.25 (0.08-0.64)</b> | -                       | -                       | -                       |
| LFIP  | LFBC  | <b>0.34 (0.20-0.55)</b> | <b>0.36 (0.16-0.70)</b> | <b>0.42 (0.18-0.85)</b> | 1.24 (0.46-2.70)        | 1.84 (0.37-5.81)        | 2.33 (0.54-6.75)        |
| LFIP  | LFP   | <b>0.55 (0.28-0.98)</b> | 0.66 (0.25-1.44)        | 0.77 (0.28-1.72)        | -                       | -                       | -                       |
| LFIP  | CB    | <b>0.24 (0.05-0.74)</b> | 0.39 (0.04-1.49)        | 0.43 (0.05-1.69)        | -                       | -                       | -                       |
| LFIP  | CI    | 0.57 (0.26-1.07)        | 0.73 (0.22-1.86)        | 0.83 (0.24-2.12)        | <b>0.46 (0.26-0.74)</b> | 0.72 (0.18-2.04)        | 0.76 (0.23-1.89)        |
| LFIP  | CIB   | 0.68 (0.26-1.47)        | 1.01 (0.23-3.03)        | 1.15 (0.25-3.45)        | 0.52 (0.21-1.08)        | 0.94 (0.16-3.27)        | 0.95 (0.20-2.90)        |
| LFIP  | IO    | <b>0.36 (0.24-0.50)</b> | <b>0.39 (0.21-0.67)</b> | <b>0.46 (0.23-0.83)</b> | <b>0.55 (0.36-0.82)</b> | 0.67 (0.27-1.43)        | 0.88 (0.37-1.75)        |
| LFIP  | IOB   | <b>0.45 (0.18-0.93)</b> | 0.49 (0.15-1.21)        | 0.56 (0.16-1.43)        | 0.40 (0.09-1.07)        | 0.59 (0.08-2.09)        | 0.75 (0.12-2.48)        |
| LFIP  | IP    | <b>0.48 (0.22-0.91)</b> | 0.61 (0.18-1.55)        | 0.69 (0.20-1.76)        | <b>0.33 (0.17-0.55)</b> | 0.49 (0.12-1.40)        | 0.52 (0.15-1.31)        |
| LFIP  | FI    | <b>0.28 (0.16-0.45)</b> | <b>0.30 (0.12-0.62)</b> | <b>0.37 (0.14-0.82)</b> | 0.62 (0.33-1.06)        | 0.70 (0.19-1.84)        | 1.24 (0.35-3.12)        |
| LFIP  | XB    | <b>0.24 (0.13-0.42)</b> | <b>0.27 (0.10-0.58)</b> | <b>0.31 (0.12-0.69)</b> | 0.61 (0.25-1.25)        | 0.82 (0.19-2.30)        | 1.06 (0.28-2.76)        |
| LFIP  | XC    | 12.5 (0.09-39.5)        | 20.8 (0.08-50.1)        | 11.4 (0.09-57.8)        | 0.57 (0.05-2.41)        | 1.11 (0.05-5.87)        | 1.06 (0.06-5.32)        |
| LFIP  | XI    | 0.43 (0.08-1.32)        | 0.47 (0.07-1.61)        | 0.54 (0.08-1.86)        | 1.18 (0.21-3.93)        | 1.68 (0.18-6.78)        | 2.05 (0.25-7.81)        |
| LFIP  | XIB   | <b>0.45 (0.29-0.65)</b> | <b>0.47 (0.25-0.80)</b> | <b>0.54 (0.27-0.95)</b> | 1.19 (0.73-1.84)        | 1.53 (0.63-3.23)        | 1.94 (0.85-3.86)        |
| LFIP  | XIC   | 1.89 (0.51-5.18)        | 1.99 (0.40-6.20)        | 2.35 (0.45-7.50)        | 0.67 (0.15-1.95)        | 0.82 (0.09-3.28)        | 1.18 (0.15-4.30)        |
| LFIP  | XO    | <b>0.37 (0.25-0.53)</b> | <b>0.37 (0.20-0.63)</b> | <b>0.44 (0.22-0.78)</b> | 0.84 (0.51-1.31)        | 0.99 (0.37-2.21)        | 1.49 (0.57-3.18)        |
| LFIP  | XOB   | <b>0.41 (0.25-0.63)</b> | <b>0.43 (0.21-0.77)</b> | <b>0.49 (0.23-0.93)</b> | 0.82 (0.40-1.49)        | 1.07 (0.33-2.67)        | 1.37 (0.47-3.20)        |
| LFIP  | XOC   | 2.25 (0.68-5.82)        | 2.34 (0.57-6.74)        | 2.76 (0.64-8.09)        | 1.11 (0.30-2.95)        | 1.51 (0.23-5.39)        | 2.12 (0.37-6.99)        |
| LFIP  | XOBC  | <b>0.46 (0.26-0.75)</b> | 0.48 (0.18-1.04)        | 0.56 (0.20-1.25)        | 0.91 (0.33-2.01)        | 1.20 (0.22-3.86)        | 1.54 (0.34-4.53)        |
| LFIP  | X     | <b>0.14 (0.06-0.27)</b> | <b>0.15 (0.05-0.36)</b> | <b>0.18 (0.06-0.43)</b> | <b>0.30 (0.11-0.65)</b> | 0.41 (0.09-1.24)        | 0.55 (0.13-1.52)        |
| LFIP  | C     | <b>0.20 (0.07-0.45)</b> | <b>0.25 (0.05-0.75)</b> | <b>0.28 (0.06-0.84)</b> | <b>0.19 (0.09-0.35)</b> | 0.33 (0.06-1.10)        | 0.34 (0.08-0.98)        |
| LFIP  | I     | <b>0.12 (0.06-0.20)</b> | <b>0.15 (0.06-0.32)</b> | <b>0.17 (0.06-0.37)</b> | <b>0.24 (0.15-0.37)</b> | <b>0.35 (0.12-0.81)</b> | <b>0.37 (0.15-0.79)</b> |
| LFIP  | O     | <b>0.11 (0.03-0.26)</b> | <b>0.12 (0.03-0.33)</b> | <b>0.15 (0.03-0.40)</b> | <b>0.34 (0.20-0.54)</b> | <b>0.41 (0.12-1.01)</b> | <b>0.63 (0.20-1.45)</b> |
| LFIP  | P     | <b>0.23 (0.08-0.54)</b> | <b>0.30 (0.05-0.99)</b> | 0.34 (0.06-1.13)        | <b>0.19 (0.09-0.37)</b> | 0.37 (0.05-1.42)        | 0.37 (0.07-1.19)        |
| LFIBP | LFO   | 0.77 (0.48-1.15)        | 0.75 (0.39-1.31)        | 1.00 (0.43-1.99)        | 0.71 (0.45-1.08)        | 0.71 (0.31-1.40)        | 1.27 (0.50-2.58)        |
| LFIBP | LFOB  | 0.90 (0.55-1.39)        | 0.88 (0.43-1.61)        | 1.15 (0.48-2.33)        | 1.26 (0.66-2.19)        | 1.49 (0.50-3.54)        | 2.26 (0.77-5.14)        |
| LFIBP | LFOC  | 1.51 (0.91-2.35)        | 1.53 (0.73-2.84)        | 2.04 (0.82-4.27)        | 0.92 (0.51-1.54)        | 0.96 (0.34-2.14)        | 1.69 (0.57-3.76)        |
| LFIBP | LFOP  | 1.03 (0.62-1.61)        | 1.07 (0.49-2.03)        | 1.38 (0.55-2.91)        | 0.88 (0.50-1.43)        | 1.02 (0.35-2.36)        | 1.69 (0.57-3.82)        |
| LFIBP | LFOI  | 0.97 (0.56-1.57)        | 0.92 (0.41-1.76)        | 1.25 (0.47-2.71)        | 1.01 (0.57-1.66)        | 0.98 (0.34-2.22)        | 1.97 (0.61-4.57)        |
| LFIBP | LFOIB | 1.52 (0.90-2.42)        | 1.53 (0.69-2.90)        | 2.00 (0.78-4.20)        | 2.32 (0.95-4.82)        | 2.60 (0.64-7.28)        | 4.39 (1.11-11.8)        |
| LFIBP | LFOIC | 2.73 (0.78-7.12)        | 2.71 (0.63-7.87)        | 3.65 (0.75-11.3)        | -                       | -                       | -                       |
| LFIBP | LFOIP | <b>5.82 (1.62-15.5)</b> | <b>5.71 (1.14-17.7)</b> | <b>7.75 (1.39-25.5)</b> | <b>17.3 (1.77-77.4)</b> | <b>18.2 (1.09-91.3)</b> | <b>34.8 (2.28-176)</b>  |
| LFIBP | LF    | <b>0.23 (0.14-0.36)</b> | <b>0.22 (0.11-0.42)</b> | <b>0.30 (0.12-0.64)</b> | <b>0.35 (0.21-0.55)</b> | <b>0.35 (0.14-0.72)</b> | 0.64 (0.23-1.38)        |
| LFIBP | LFB   | 0.54 (0.23-1.06)        | 0.55 (0.17-1.32)        | 0.71 (0.20-1.84)        | 0.54 (0.19-1.26)        | 0.65 (0.12-2.08)        | 0.95 (0.20-2.85)        |
| LFIBP | LFC   | <b>0.34 (0.14-0.68)</b> | <b>0.34 (0.10-0.87)</b> | 0.46 (0.12-1.26)        | -                       | -                       | -                       |



| T1    | T2    | Overall response rate   |                          |                         | Disease control rate    |                         |                         |
|-------|-------|-------------------------|--------------------------|-------------------------|-------------------------|-------------------------|-------------------------|
|       |       | Fixed effects           | Random effects           | Meta-regression         | Fixed effects           | Random effects          | Meta-regression         |
| LFIBP | LFBC  | 0.59 (0.31-1.01)        | 0.59 (0.23-1.26)         | 0.77 (0.26-1.78)        | 0.97 (0.33-2.23)        | 1.27 (0.22-4.21)        | 1.85 (0.36-5.71)        |
| LFIBP | LFP   | 0.95 (0.44-1.79)        | 1.08 (0.36-2.55)         | 1.40 (0.42-3.56)        | -                       | -                       | -                       |
| LFIBP | CB    | 0.42 (0.08-1.29)        | 0.62 (0.07-2.48)         | 0.78 (0.08-3.17)        | -                       | -                       | -                       |
| LFIBP | CI    | 0.97 (0.42-1.92)        | 1.19 (0.32-3.16)         | 1.50 (0.38-4.14)        | <b>0.36 (0.19-0.62)</b> | 0.49 (0.11-1.41)        | 0.59 (0.16-1.52)        |
| LFIBP | CIB   | 1.16 (0.41-2.62)        | 1.64 (0.34-5.08)         | 2.08 (0.41-6.66)        | <b>0.41 (0.16-0.88)</b> | 0.64 (0.10-2.23)        | 0.74 (0.14-2.31)        |
| LFIBP | IO    | <b>0.61 (0.37-0.95)</b> | 0.64 (0.30-1.20)         | 0.84 (0.33-1.76)        | <b>0.43 (0.25-0.70)</b> | 0.45 (0.16-1.02)        | 0.69 (0.25-1.48)        |
| LFIBP | IOB   | 0.77 (0.29-1.67)        | 0.79 (0.21-2.09)         | 1.03 (0.25-2.88)        | <b>0.31 (0.07-0.87)</b> | 0.41 (0.05-1.50)        | 0.60 (0.08-2.06)        |
| LFIBP | IP    | 0.82 (0.35-1.64)        | 0.99 (0.27-2.63)         | 1.24 (0.31-3.43)        | <b>0.25 (0.12-0.46)</b> | <b>0.33 (0.07-0.97)</b> | 0.41 (0.11-1.05)        |
| LFIBP | FI    | 0.48 (0.25-0.82)        | 0.48 (0.17-1.07)         | 0.67 (0.20-1.66)        | <b>0.48 (0.23-0.88)</b> | 0.47 (0.12-1.29)        | 0.98 (0.23-2.63)        |
| LFIBP | XB    | 0.42 (0.20-0.78)        | 0.44 (0.15-1.02)         | 0.57 (0.17-1.41)        | 0.48 (0.18-1.04)        | 0.56 (0.12-1.69)        | 0.84 (0.19-2.35)        |
| LFIBP | XC    | 22.2 (0.15-67.0)        | 34.3 (0.12-80.0)         | 20.5 (0.15-104)         | 0.45 (0.04-1.90)        | 0.75 (0.03-4.01)        | 0.82 (0.04-4.13)        |
| LFIBP | XI    | 0.74 (0.13-2.32)        | 0.76 (0.10-2.70)         | 0.98 (0.12-3.58)        | 0.93 (0.15-3.17)        | 1.16 (0.11-4.93)        | 1.63 (0.17-6.49)        |
| LFIBP | XIB   | 0.77 (0.45-1.23)        | 0.76 (0.34-1.46)         | 0.98 (0.38-2.06)        | 0.93 (0.50-1.60)        | 1.07 (0.35-2.54)        | 1.54 (0.53-3.49)        |
| LFIBP | XIC   | 3.24 (0.82-9.11)        | 3.22 (0.59-10.5)         | 4.28 (0.70-14.6)        | 0.52 (0.11-1.56)        | 0.56 (0.06-2.27)        | 0.93 (0.11-3.51)        |
| LFIBP | XO    | 0.64 (0.38-1.00)        | 0.60 (0.28-1.13)         | 0.80 (0.31-1.68)        | 0.66 (0.36-1.11)        | 0.67 (0.22-1.60)        | 1.18 (0.37-2.72)        |
| LFIBP | XOB   | 0.70 (0.38-1.17)        | 0.69 (0.29-1.40)         | 0.90 (0.33-1.98)        | 0.64 (0.28-1.26)        | 0.74 (0.19-2.02)        | 1.09 (0.30-2.81)        |
| LFIBP | XOC   | <b>3.87 (1.11-10.2)</b> | 3.80 (0.84-11.43)        | 5.04 (0.99-15.9)        | 0.87 (0.22-2.37)        | 1.03 (0.14-3.76)        | 1.68 (0.26-5.75)        |
| LFIBP | XOBC  | 0.78 (0.40-1.39)        | 0.78 (0.26-1.82)         | 1.02 (0.30-2.55)        | 0.72 (0.24-1.65)        | 0.83 (0.13-2.80)        | 1.22 (0.23-3.79)        |
| LFIBP | X     | <b>0.24 (0.10-0.49)</b> | <b>0.25 (0.07-0.62)</b>  | <b>0.33 (0.09-0.87)</b> | <b>0.24 (0.08-0.54)</b> | <b>0.28 (0.05-0.90)</b> | 0.43 (0.09-1.29)        |
| LFIBP | C     | <b>0.34 (0.11-0.80)</b> | 0.40 (0.08-1.25)         | 0.51 (0.10-1.61)        | <b>0.15 (0.07-0.29)</b> | <b>0.23 (0.04-0.75)</b> | <b>0.26 (0.06-0.78)</b> |
| LFIBP | I     | <b>0.20 (0.10-0.37)</b> | <b>0.24 (0.08-0.56)</b>  | <b>0.30 (0.10-0.73)</b> | <b>0.19 (0.10-0.32)</b> | <b>0.23 (0.07-0.57)</b> | <b>0.29 (0.10-0.65)</b> |
| LFIBP | O     | <b>0.19 (0.05-0.46)</b> | <b>0.20 (0.04-0.55)</b>  | <b>0.26 (0.05-0.80)</b> | 0.26 (0.14-0.46)        | 0.28 (0.08-0.72)        | 0.49 (0.14-1.22)        |
| LFIBP | P     | <b>0.40 (0.12-0.96)</b> | 0.49 (0.08-1.66)         | 0.62 (0.10-2.15)        | 0.15 (0.06-0.30)        | 0.25 (0.03-0.96)        | <b>0.28 (0.05-0.95)</b> |
| LFO   | LFOB  | 1.18 (0.94-1.46)        | 1.18 (0.83-1.62)         | 1.16 (0.81-1.60)        | <b>1.77 (1.09-2.75)</b> | 2.14 (0.98-4.18)        | 1.83 (0.91-3.41)        |
| LFO   | LFOC  | <b>1.97 (1.56-2.45)</b> | 2.05 (1.43-2.87)         | 2.05 (1.42-2.88)        | 1.30 (0.90-1.81)        | 1.36 (0.74-2.29)        | 1.34 (0.79-2.13)        |
| LFO   | LFOP  | <b>1.35 (1.08-1.66)</b> | 1.42 (0.94-2.08)         | 1.39 (0.92-2.04)        | 1.23 (0.89-1.65)        | 1.44 (0.75-2.56)        | 1.34 (0.78-2.24)        |
| LFO   | LFOI  | 1.28 (0.89-1.77)        | 1.24 (0.72-1.96)         | 1.26 (0.73-2.01)        | 1.43 (0.94-2.10)        | 1.42 (0.63-2.75)        | 1.57 (0.78-2.83)        |
| LFO   | LFOIB | <b>2.00 (1.47-2.65)</b> | <b>2.04 (1.26-3.13)</b>  | <b>2.02 (1.24-3.11)</b> | <b>3.27 (1.49-6.33)</b> | <b>3.74 (1.15-9.33)</b> | <b>3.54 (1.24-8.23)</b> |
| LFO   | LFOIC | <b>3.58 (1.13-8.92)</b> | 3.64 (1.00-9.72)         | <b>3.68 (1.01-9.88)</b> | -                       | -                       | -                       |
| LFO   | LFOIP | <b>7.63 (2.31-19.4)</b> | <b>7.69 (1.79-22.41)</b> | <b>7.80 (1.82-22.7)</b> | <b>24.5 (2.65-108)</b>  | <b>26.4 (1.81-130)</b>  | <b>27.7 (2.32-136)</b>  |
| LFO   | LF    | <b>0.30 (0.23-0.38)</b> | <b>0.30 (0.20-0.42)</b>  | <b>0.30 (0.20-0.43)</b> | <b>0.49 (0.38-0.61)</b> | <b>0.49 (0.31-0.73)</b> | <b>0.51 (0.34-0.73)</b> |
| LFO   | LFB   | 0.71 (0.35-1.26)        | 0.73 (0.28-1.56)         | 0.72 (0.27-1.53)        | 0.77 (0.29-1.67)        | 0.93 (0.21-2.72)        | 0.77 (0.21-2.10)        |
| LFO   | LFC   | <b>0.44 (0.21-0.81)</b> | 0.46 (0.16-1.03)         | 0.46 (0.17-1.04)        | -                       | -                       | -                       |
| LFO   | LFBC  | 0.77 (0.49-1.15)        | 0.79 (0.39-1.41)         | 0.77 (0.38-1.40)        | 1.37 (0.52-2.94)        | 1.82 (0.39-5.53)        | 1.50 (0.38-4.18)        |
| LFO   | LFP   | 1.24 (0.68-2.07)        | 1.44 (0.61-2.93)         | 1.41 (0.59-2.89)        | -                       | -                       | -                       |
| LFO   | CB    | 0.55 (0.11-1.63)        | 0.83 (0.10-3.16)         | 0.80 (0.10-3.03)        | -                       | -                       | -                       |
| LFO   | CI    | 1.27 (0.63-2.30)        | 1.59 (0.52-3.84)         | 1.53 (0.50-3.70)        | <b>0.51 (0.30-0.80)</b> | 0.71 (0.20-1.88)        | 0.49 (0.16-1.22)        |
| LFO   | CIB   | 1.52 (0.61-3.19)        | 2.19 (0.53-6.33)         | 2.12 (0.51-6.12)        | 0.58 (0.24-1.18)        | 0.92 (0.17-3.05)        | 0.62 (0.14-1.89)        |
| LFO   | IO    | 0.80 (0.62-1.02)        | 0.85 (0.54-1.29)         | 0.85 (0.53-1.29)        | <b>0.61 (0.41-0.88)</b> | 0.66 (0.31-1.24)        | 0.57 (0.29-1.01)        |
| LFO   | IOB   | 1.01 (0.43-2.01)        | 1.05 (0.34-2.50)         | 1.03 (0.34-2.45)        | 0.44 (0.10-1.17)        | 0.58 (0.09-1.99)        | 0.48 (0.08-1.55)        |

| T1   | T2    | Overall response rate   |                         |                         | Disease control rate    |                         |                         |
|------|-------|-------------------------|-------------------------|-------------------------|-------------------------|-------------------------|-------------------------|
|      |       | Fixed effects           | Random effects          | Meta-regression         | Fixed effects           | Random effects          | Meta-regression         |
| LFO  | IP    | 1.07 (0.52-1.97)        | 1.32 (0.43-3.18)        | 1.27 (0.41-3.08)        | <b>0.36 (0.20-0.60)</b> | 0.48 (0.13-1.28)        | <b>0.34 (0.11-0.84)</b> |
| LFO  | FI    | <b>0.63 (0.39-0.96)</b> | 0.65 (0.28-1.28)        | 0.67 (0.29-1.34)        | 0.68 (0.37-1.16)        | 0.69 (0.21-1.69)        | 0.78 (0.27-1.74)        |
| LFO  | XB    | <b>0.55 (0.30-0.91)</b> | 0.59 (0.25-1.19)        | 0.58 (0.24-1.17)        | 0.68 (0.28-1.37)        | 0.81 (0.21-2.15)        | 0.68 (0.21-1.67)        |
| LFO  | XC    | 27.4 (0.20-87.6)        | 42.9 (0.18-108)         | 21.1 (0.17-108)         | 0.63 (0.06-2.67)        | 1.09 (0.05-5.71)        | 0.69 (0.04-3.45)        |
| LFO  | XI    | 0.97 (0.19-2.93)        | 1.02 (0.16-3.43)        | 1.00 (0.15-3.33)        | 1.31 (0.23-4.34)        | 1.68 (0.18-6.72)        | 1.33 (0.17-4.96)        |
| LFO  | XIB   | 1.01 (0.72-1.36)        | 1.02 (0.61-1.59)        | 0.99 (0.59-1.55)        | 1.31 (0.81-2.02)        | 1.53 (0.67-3.07)        | 1.25 (0.60-2.40)        |
| LFO  | XIC   | <b>4.24 (1.20-11.3)</b> | 4.29 (0.95-12.9)        | 4.29 (0.93-13.0)        | 0.73 (0.17-2.09)        | 0.78 (0.10-2.95)        | 0.74 (0.11-2.52)        |
| LFO  | XO    | 0.84 (0.67-1.04)        | 0.80 (0.54-1.12)        | 0.80 (0.54-1.12)        | 0.92 (0.63-1.30)        | 0.95 (0.46-1.75)        | 0.93 (0.50-1.60)        |
| LFO  | XOB   | 0.92 (0.61-1.33)        | 0.93 (0.52-1.54)        | 0.91 (0.50-1.52)        | 0.91 (0.45-1.64)        | 1.07 (0.36-2.53)        | 0.89 (0.34-1.97)        |
| LFO  | XOC   | <b>5.05 (1.62-12.7)</b> | <b>5.06 (1.36-13.9)</b> | <b>5.05 (1.36-13.8)</b> | 1.22 (0.35-3.15)        | 1.46 (0.26-4.79)        | 1.33 (0.28-4.06)        |
| LFO  | XOBC  | 1.03 (0.62-1.61)        | 1.05 (0.43-2.13)        | 1.03 (0.42-2.10)        | 1.01 (0.37-2.21)        | 1.19 (0.23-3.69)        | 0.99 (0.24-2.83)        |
| LFO  | X     | <b>0.31 (0.15-0.58)</b> | <b>0.33 (0.12-0.73)</b> | <b>0.33 (0.12-0.72)</b> | <b>0.34 (0.13-0.71)</b> | <b>0.41 (0.10-1.14)</b> | <b>0.35 (0.10-0.91)</b> |
| LFO  | C     | <b>0.45 (0.16-0.98)</b> | 0.54 (0.12-1.56)        | 0.52 (0.12-1.49)        | <b>0.21 (0.10-0.38)</b> | 0.33 (0.07-1.02)        | <b>0.22 (0.06-0.64)</b> |
| LFO  | I     | <b>0.27 (0.15-0.43)</b> | <b>0.32 (0.14-0.65)</b> | <b>0.31 (0.13-0.62)</b> | <b>0.27 (0.17-0.40)</b> | <b>0.34 (0.14-0.72)</b> | <b>0.24 (0.11-0.50)</b> |
| LFO  | O     | <b>0.25 (0.07-0.56)</b> | <b>0.26 (0.07-0.66)</b> | <b>0.26 (0.07-0.67)</b> | <b>0.37 (0.24-0.54)</b> | <b>0.39 (0.15-0.83)</b> | <b>0.39 (0.17-0.75)</b> |
| LFO  | P     | 0.52 (0.18-1.19)        | 0.66 (0.12-2.09)        | 0.63 (0.12-2.01)        | <b>0.21 (0.10-0.40)</b> | 0.36 (0.05-1.33)        | <b>0.24 (0.05-0.78)</b> |
| LFOB | LFOC  | <b>1.68 (1.25-2.23)</b> | <b>1.77 (1.13-2.69)</b> | <b>1.81 (1.14-2.75)</b> | 0.77 (0.42-1.30)        | 0.72 (0.27-1.55)        | 0.81 (0.33-1.63)        |
| LFOB | LFOP  | 1.15 (0.87-1.49)        | 1.23 (0.77-1.89)        | 1.22 (0.76-1.89)        | 0.73 (0.43-1.14)        | 0.74 (0.31-1.49)        | 0.80 (0.37-1.49)        |
| LFOB | LFOI  | 1.09 (0.74-1.54)        | 1.07 (0.60-1.74)        | 1.10 (0.62-1.81)        | 0.84 (0.47-1.41)        | 0.73 (0.27-1.59)        | 0.94 (0.37-1.89)        |
| LFOB | LFOIB | <b>1.70 (1.30-2.18)</b> | <b>1.74 (1.16-2.54)</b> | <b>1.75 (1.16-2.55)</b> | 1.88 (0.92-3.48)        | 1.82 (0.63-4.19)        | 2.01 (0.76-4.32)        |
| LFOB | LFOIC | 3.06 (0.95-7.65)        | 3.14 (0.84-8.51)        | 3.23 (0.86-8.77)        | -                       | -                       | -                       |
| LFOB | LFOIP | <b>6.51 (1.95-16.6)</b> | <b>6.63 (1.52-19.5)</b> | <b>6.84 (1.58-20.1)</b> | <b>14.6 (1.47-64.8)</b> | 13.6 (0.84-68.3)        | 16.5 (1.25-82.5)        |
| LFOB | LF    | <b>0.26 (0.18-0.35)</b> | <b>0.26 (0.16-0.41)</b> | <b>0.27 (0.16-0.42)</b> | <b>0.29 (0.17-0.47)</b> | <b>0.26 (0.10-0.54)</b> | <b>0.31 (0.13-0.59)</b> |
| LFOB | LFB   | 0.60 (0.31-1.05)        | 0.62 (0.25-1.28)        | 0.62 (0.25-1.27)        | <b>0.44 (0.18-0.90)</b> | 0.45 (0.12-1.18)        | 0.43 (0.13-1.05)        |
| LFOB | LFC   | <b>0.38 (0.18-0.71)</b> | <b>0.40 (0.13-0.93)</b> | <b>0.41 (0.14-0.96)</b> | -                       | -                       | -                       |
| LFOB | LFBC  | <b>0.65 (0.44-0.92)</b> | 0.67 (0.37-1.10)        | 0.67 (0.37-1.11)        | 0.77 (0.34-1.49)        | 0.85 (0.24-2.19)        | 0.81 (0.27-1.93)        |
| LFOB | LFP   | 1.06 (0.57-1.81)        | 1.24 (0.51-2.60)        | 1.24 (0.51-2.60)        | -                       | -                       | -                       |
| LFOB | CB    | 0.47 (0.10-1.40)        | 0.72 (0.09-2.78)        | 0.71 (0.08-2.72)        | -                       | -                       | -                       |
| LFOB | CI    | 1.09 (0.52-2.01)        | 1.38 (0.43-3.42)        | 1.35 (0.42-3.36)        | <b>0.30 (0.15-0.54)</b> | 0.37 (0.08-1.08)        | <b>0.29 (0.08-0.77)</b> |
| LFOB | CIB   | 1.30 (0.51-2.77)        | 1.91 (0.44-5.60)        | 1.87 (0.43-5.53)        | <b>0.34 (0.13-0.75)</b> | 0.48 (0.07-1.70)        | 0.37 (0.07-1.16)        |
| LFOB | IO    | <b>0.69 (0.50-0.92)</b> | 0.74 (0.43-1.21)        | 0.75 (0.43-1.23)        | <b>0.36 (0.20-0.61)</b> | <b>0.34 (0.12-0.78)</b> | <b>0.34 (0.13-0.71)</b> |
| LFOB | IOB   | 0.85 (0.38-1.66)        | 0.89 (0.31-2.03)        | 0.89 (0.31-2.02)        | <b>0.25 (0.07-0.61)</b> | <b>0.27 (0.05-0.82)</b> | <b>0.26 (0.06-0.74)</b> |
| LFOB | IP    | 0.92 (0.43-1.72)        | 1.15 (0.36-2.86)        | 1.12 (0.34-2.79)        | <b>0.21 (0.10-0.40)</b> | <b>0.25 (0.06-0.74)</b> | <b>0.20 (0.05-0.53)</b> |
| LFOB | FI    | <b>0.54 (0.32-0.84)</b> | 0.57 (0.24-1.15)        | 0.59 (0.25-1.23)        | <b>0.40 (0.19-0.76)</b> | <b>0.36 (0.09-0.99)</b> | 0.47 (0.13-1.17)        |
| LFOB | XB    | <b>0.47 (0.26-0.78)</b> | 0.50 (0.21-1.03)        | 0.50 (0.21-1.03)        | <b>0.40 (0.15-0.83)</b> | 0.41 (0.10-1.13)        | 0.40 (0.11-1.00)        |
| LFOB | XC    | 23.4 (0.17-75.3)        | 37.6 (0.16-94.8)        | 18.7 (0.15-94.9)        | 0.37 (0.03-1.60)        | 0.57 (0.02-3.05)        | 0.41 (0.02-2.08)        |
| LFOB | XI    | 0.82 (0.16-2.49)        | 0.88 (0.14-2.92)        | 0.87 (0.13-2.91)        | 0.76 (0.13-2.54)        | 0.84 (0.09-3.36)        | 0.77 (0.10-2.85)        |
| LFOB | XIB   | 0.86 (0.62-1.15)        | 0.87 (0.54-1.34)        | 0.86 (0.53-1.33)        | 0.77 (0.46-1.21)        | 0.76 (0.33-1.51)        | 0.72 (0.34-1.34)        |
| LFOB | XIC   | <b>3.62 (1.01-9.72)</b> | 3.71 (0.8-11.31)        | 3.77 (0.80-11.6)        | 0.43 (0.09-1.30)        | 0.41 (0.04-1.65)        | 0.44 (0.06-1.60)        |
| LFOB | XO    | <b>0.72 (0.52-0.96)</b> | 0.70 (0.42-1.09)        | 0.71 (0.42-1.11)        | <b>0.55 (0.29-0.93)</b> | 0.50 (0.17-1.15)        | 0.57 (0.22-1.18)        |

| T1   | T2    | Overall response rate   |                         |                         | Disease control rate    |                         |                         |
|------|-------|-------------------------|-------------------------|-------------------------|-------------------------|-------------------------|-------------------------|
|      |       | Fixed effects           | Random effects          | Meta-regression         | Fixed effects           | Random effects          | Meta-regression         |
| LFOB | XOB   | 0.78 (0.54-1.10)        | 0.79 (0.47-1.25)        | 0.79 (0.46-1.25)        | <b>0.52 (0.27-0.92)</b> | 0.52 (0.19-1.14)        | 0.50 (0.20-1.02)        |
| LFOB | XOC   | <b>4.32 (1.36-10.9)</b> | <b>4.37 (1.14-12.2)</b> | <b>4.44 (1.16-12.4)</b> | 0.72 (0.19-1.98)        | 0.77 (0.11-2.73)        | 0.80 (0.14-2.60)        |
| LFOB | XOBC  | 0.87 (0.54-1.34)        | 0.89 (0.38-1.78)        | 0.89 (0.38-1.78)        | 0.58 (0.22-1.26)        | 0.58 (0.12-1.74)        | 0.56 (0.14-1.52)        |
| LFOB | X     | <b>0.27 (0.12-0.50)</b> | <b>0.29 (0.10-0.65)</b> | <b>0.29 (0.10-0.65)</b> | <b>0.20 (0.07-0.43)</b> | <b>0.21 (0.04-0.61)</b> | <b>0.21 (0.05-0.55)</b> |
| LFOB | C     | <b>0.38 (0.14-0.85)</b> | 0.47 (0.10-1.38)        | 0.46 (0.10-1.35)        | <b>0.12 (0.05-0.25)</b> | <b>0.17 (0.03-0.57)</b> | <b>0.13 (0.03-0.39)</b> |
| LFOB | I     | <b>0.23 (0.13-0.38)</b> | <b>0.28 (0.11-0.59)</b> | <b>0.27 (0.11-0.57)</b> | <b>0.16 (0.08-0.27)</b> | <b>0.18 (0.05-0.44)</b> | <b>0.15 (0.05-0.33)</b> |
| LFOB | O     | <b>0.21 (0.06-0.49)</b> | <b>0.23 (0.05-0.60)</b> | <b>0.23 (0.05-0.62)</b> | <b>0.22 (0.11-0.39)</b> | <b>0.21 (0.06-0.53)</b> | <b>0.24 (0.08-0.54)</b> |
| LFOB | P     | 0.45 (0.15-1.02)        | 0.57 (0.10-1.86)        | 0.56 (0.10-1.81)        | <b>0.13 (0.05-0.26)</b> | <b>0.19 (0.02-0.73)</b> | <b>0.14 (0.02-0.48)</b> |
| LFOC | LFOP  | <b>0.69 (0.50-0.93)</b> | 0.71 (0.42-1.15)        | 0.70 (0.40-1.13)        | 0.98 (0.60-1.51)        | 1.15 (0.47-2.40)        | 1.07 (0.50-2.07)        |
| LFOC | LFOI  | <b>0.66 (0.44-0.95)</b> | 0.62 (0.33-1.05)        | 0.63 (0.34-1.07)        | 1.14 (0.65-1.85)        | 1.13 (0.41-2.48)        | 1.25 (0.52-2.52)        |
| LFOC | LFOIB | 1.03 (0.71-1.43)        | 1.02 (0.58-1.67)        | 1.01 (0.57-1.66)        | <b>2.60 (1.09-5.32)</b> | 2.97 (0.79-8.00)        | 2.81 (0.86-7.03)        |
| LFOC | LFOIC | 1.84 (0.57-4.62)        | 1.82 (0.48-4.93)        | 1.83 (0.49-4.97)        | -                       | -                       | -                       |
| LFOC | LFOIP | 3.92 (1.16-10.1)        | 3.86 (0.86-11.5)        | 3.91 (0.87-11.6)        | <b>19.5 (2.00-86.9)</b> | <b>20.9 (1.29-106)</b>  | <b>21.9 (1.69-110)</b>  |
| LFOC | LF    | <b>0.15 (0.11-0.21)</b> | <b>0.15 (0.09-0.24)</b> | <b>0.15 (0.09-0.24)</b> | <b>0.39 (0.25-0.58)</b> | <b>0.39 (0.18-0.74)</b> | <b>0.40 (0.21-0.71)</b> |
| LFOC | LFB   | <b>0.36 (0.17-0.66)</b> | <b>0.37 (0.13-0.81)</b> | <b>0.36 (0.13-0.79)</b> | 0.61 (0.21-1.38)        | 0.74 (0.15-2.28)        | 0.61 (0.15-1.75)        |
| LFOC | LFC   | <b>0.23 (0.11-0.43)</b> | <b>0.23 (0.08-0.54)</b> | <b>0.23 (0.08-0.55)</b> | -                       | -                       | -                       |
| LFOC | LFBC  | <b>0.40 (0.24-0.61)</b> | <b>0.39 (0.18-0.74)</b> | <b>0.39 (0.18-0.73)</b> | 1.09 (0.38-2.45)        | 1.44 (0.27-4.61)        | 1.18 (0.28-3.48)        |
| LFOC | LFP   | 0.64 (0.33-1.10)        | 0.72 (0.28-1.54)        | 0.71 (0.28-1.53)        | -                       | -                       | -                       |
| LFOC | CB    | <b>0.28 (0.06-0.85)</b> | 0.42 (0.05-1.61)        | 0.40 (0.05-1.55)        | -                       | -                       | -                       |
| LFOC | CI    | 0.65 (0.31-1.22)        | 0.80 (0.24-1.98)        | 0.77 (0.23-1.92)        | <b>0.40 (0.21-0.69)</b> | 0.56 (0.13-1.62)        | 0.39 (0.11-1.03)        |
| LFOC | CIB   | 0.78 (0.30-1.68)        | 1.10 (0.25-3.25)        | 1.07 (0.24-3.14)        | <b>0.46 (0.18-0.98)</b> | 0.74 (0.12-2.57)        | 0.49 (0.10-1.57)        |
| LFOC | IO    | <b>0.41 (0.30-0.56)</b> | <b>0.43 (0.24-0.71)</b> | <b>0.43 (0.24-0.71)</b> | <b>0.49 (0.29-0.78)</b> | 0.52 (0.20-1.13)        | <b>0.45 (0.19-0.91)</b> |
| LFOC | IOB   | 0.52 (0.22-1.05)        | 0.53 (0.16-1.29)        | 0.52 (0.16-1.26)        | <b>0.35 (0.08-0.96)</b> | 0.46 (0.06-1.65)        | 0.38 (0.06-1.28)        |
| LFOC | IP    | 0.55 (0.26-1.04)        | 0.66 (0.20-1.66)        | 0.64 (0.19-1.60)        | <b>0.29 (0.14-0.52)</b> | 0.38 (0.09-1.11)        | <b>0.27 (0.08-0.71)</b> |
| LFOC | FI    | <b>0.32 (0.19-0.51)</b> | <b>0.33 (0.13-0.67)</b> | <b>0.34 (0.14-0.70)</b> | <b>0.54 (0.26-0.99)</b> | 0.55 (0.14-1.46)        | 0.62 (0.19-1.49)        |
| LFOC | XB    | <b>0.28 (0.15-0.48)</b> | <b>0.29 (0.12-0.62)</b> | <b>0.29 (0.11-0.61)</b> | 0.54 (0.20-1.14)        | 0.64 (0.15-1.84)        | 0.54 (0.14-1.42)        |
| LFOC | XC    | 13.97 (0.1-45.2)        | 21.7 (0.09-54.6)        | 10.6 (0.08-53.9)        | 0.50 (0.05-2.14)        | 0.87 (0.04-4.63)        | 0.55 (0.03-2.78)        |
| LFOC | XI    | 0.50 (0.09-1.52)        | 0.51 (0.08-1.74)        | 0.50 (0.07-1.69)        | 1.04 (0.17-3.51)        | 1.32 (0.13-5.47)        | 1.05 (0.13-4.07)        |
| LFOC | XIB   | <b>0.52 (0.35-0.73)</b> | <b>0.51 (0.28-0.85)</b> | <b>0.50 (0.27-0.83)</b> | 1.04 (0.58-1.74)        | 1.21 (0.45-2.70)        | 0.99 (0.41-2.08)        |
| LFOC | XIC   | 2.18 (0.60-5.91)        | 2.16 (0.45-6.64)        | 2.16 (0.45-6.68)        | 0.58 (0.13-1.72)        | 0.63 (0.07-2.47)        | 0.59 (0.08-2.08)        |
| LFOC | XO    | <b>0.43 (0.31-0.58)</b> | <b>0.40 (0.23-0.64)</b> | <b>0.40 (0.23-0.64)</b> | 0.73 (0.43-1.17)        | 0.76 (0.29-1.64)        | 0.74 (0.32-1.47)        |
| LFOC | XOB   | <b>0.47 (0.30-0.71)</b> | <b>0.47 (0.24-0.81)</b> | <b>0.46 (0.23-0.80)</b> | 0.72 (0.33-1.38)        | 0.85 (0.24-2.18)        | 0.70 (0.23-1.68)        |
| LFOC | XOC   | 2.60 (0.81-6.63)        | 2.54 (0.64-7.19)        | 2.54 (0.64-7.18)        | 0.97 (0.26-2.61)        | 1.16 (0.18-4.06)        | 1.06 (0.20-3.38)        |
| LFOC | XOBC  | <b>0.53 (0.31-0.85)</b> | 0.52 (0.20-1.11)        | 0.51 (0.20-1.09)        | 0.80 (0.28-1.83)        | 0.94 (0.16-3.07)        | 0.79 (0.17-2.35)        |
| LFOC | X     | <b>0.16 (0.07-0.31)</b> | <b>0.17 (0.06-0.38)</b> | <b>0.17 (0.06-0.38)</b> | <b>0.27 (0.09-0.59)</b> | <b>0.32 (0.07-0.97)</b> | <b>0.28 (0.07-0.77)</b> |
| LFOC | C     | <b>0.23 (0.08-0.52)</b> | <b>0.27 (0.06-0.80)</b> | <b>0.26 (0.06-0.77)</b> | <b>0.17 (0.07-0.32)</b> | <b>0.26 (0.05-0.86)</b> | <b>0.18 (0.04-0.53)</b> |
| LFOC | I     | <b>0.14 (0.08-0.23)</b> | <b>0.16 (0.07-0.34)</b> | <b>0.16 (0.06-0.33)</b> | <b>0.21 (0.12-0.35)</b> | <b>0.27 (0.09-0.64)</b> | <b>0.19 (0.07-0.43)</b> |
| LFOC | O     | <b>0.13 (0.04-0.29)</b> | <b>0.13 (0.03-0.35)</b> | <b>0.13 (0.03-0.35)</b> | <b>0.29 (0.16-0.49)</b> | <b>0.31 (0.10-0.75)</b> | <b>0.31 (0.12-0.68)</b> |
| LFOC | P     | <b>0.27 (0.09-0.62)</b> | 0.33 (0.06-1.07)        | 0.32 (0.06-1.03)        | <b>0.17 (0.07-0.34)</b> | 0.29 (0.04-1.11)        | <b>0.19 (0.03-0.65)</b> |
| LFOP | LFOI  | 0.96 (0.63-1.40)        | 0.90 (0.46-1.57)        | 0.94 (0.48-1.65)        | 1.19 (0.70-1.89)        | 1.08 (0.38-2.39)        | 1.25 (0.50-2.52)        |

| T1   | T2    | Overall response rate   |                         |                         | Disease control rate    |                         |                         |
|------|-------|-------------------------|-------------------------|-------------------------|-------------------------|-------------------------|-------------------------|
|      |       | Fixed effects           | Random effects          | Meta-regression         | Fixed effects           | Random effects          | Meta-regression         |
| LFOP | LFOIB | <b>1.50 (1.05-2.09)</b> | 1.49 (0.81-2.48)        | 1.50 (0.82-2.51)        | <b>2.71 (1.20-5.38)</b> | 2.79 (0.77-7.28)        | 2.77 (0.89-6.67)        |
| LFOP | LFOIC | 2.69 (0.83-6.78)        | 2.66 (0.68-7.35)        | 2.75 (0.69-7.65)        | -                       | -                       | -                       |
| LFOP | LFOIP | <b>5.73 (1.70-14.8)</b> | <b>5.62 (1.21-16.9)</b> | <b>5.82 (1.27-17.4)</b> | <b>20.4 (2.12-91.3)</b> | <b>20.0 (1.22-100)</b>  | <b>22.0 (1.69-110)</b>  |
| LFOP | LF    | <b>0.23 (0.16-0.31)</b> | <b>0.22 (0.12-0.36)</b> | <b>0.23 (0.13-0.37)</b> | <b>0.41 (0.27-0.59)</b> | <b>0.37 (0.16-0.72)</b> | <b>0.41 (0.20-0.72)</b> |
| LFOP | LFB   | <b>0.53 (0.26-0.97)</b> | 0.53 (0.19-1.18)        | 0.53 (0.19-1.18)        | 0.64 (0.23-1.41)        | 0.69 (0.14-2.09)        | 0.60 (0.15-1.67)        |
| LFOP | LFC   | <b>0.33 (0.16-0.62)</b> | <b>0.34 (0.11-0.79)</b> | <b>0.35 (0.11-0.83)</b> | -                       | -                       | -                       |
| LFOP | LFBC  | <b>0.58 (0.36-0.89)</b> | 0.57 (0.26-1.08)        | 0.57 (0.26-1.09)        | 1.13 (0.42-2.46)        | 1.34 (0.27-4.12)        | 1.16 (0.29-3.25)        |
| LFOP | LFP   | 0.92 (0.53-1.48)        | 1.01 (0.49-1.89)        | 1.01 (0.49-1.90)        | -                       | -                       | -                       |
| LFOP | CB    | 0.41 (0.08-1.24)        | 0.61 (0.07-2.35)        | 0.60 (0.07-2.31)        | -                       | -                       | -                       |
| LFOP | CI    | 0.96 (0.45-1.78)        | 1.16 (0.35-2.94)        | 1.14 (0.34-2.89)        | <b>0.42 (0.23-0.72)</b> | 0.54 (0.12-1.57)        | 0.39 (0.11-1.02)        |
| LFOP | CIB   | 1.15 (0.44-2.45)        | 1.60 (0.36-4.77)        | 1.59 (0.35-4.73)        | 0.48 (0.19-1.02)        | 0.70 (0.11-2.47)        | 0.49 (0.10-1.56)        |
| LFOP | IO    | <b>0.60 (0.43-0.82)</b> | 0.62 (0.34-1.06)        | 0.63 (0.34-1.09)        | <b>0.51 (0.31-0.80)</b> | 0.50 (0.18-1.10)        | <b>0.45 (0.18-0.91)</b> |
| LFOP | IOB   | 0.76 (0.32-1.53)        | 0.77 (0.23-1.87)        | 0.77 (0.23-1.88)        | <b>0.37 (0.09-0.97)</b> | 0.43 (0.06-1.48)        | 0.37 (0.06-1.20)        |
| LFOP | IP    | 0.81 (0.37-1.52)        | 0.97 (0.29-2.45)        | 0.95 (0.28-2.40)        | <b>0.30 (0.15-0.53)</b> | 0.37 (0.08-1.07)        | <b>0.27 (0.07-0.71)</b> |
| LFOP | FI    | <b>0.47 (0.28-0.75)</b> | 0.48 (0.19-1.00)        | 0.50 (0.20-1.07)        | 0.57 (0.28-1.02)        | 0.52 (0.13-1.42)        | 0.62 (0.18-1.51)        |
| LFOP | XB    | <b>0.41 (0.22-0.70)</b> | <b>0.43 (0.16-0.91)</b> | <b>0.43 (0.16-0.92)</b> | 0.57 (0.22-1.18)        | 0.61 (0.14-1.73)        | 0.53 (0.15-1.39)        |
| LFOP | XC    | 20.3 (0.15-66.3)        | 31.4 (0.13-78.7)        | 15.6 (0.12-80.9)        | 0.53 (0.05-2.23)        | 0.83 (0.03-4.40)        | 0.55 (0.03-2.77)        |
| LFOP | XI    | 0.73 (0.14-2.22)        | 0.74 (0.11-2.55)        | 0.74 (0.11-2.54)        | 1.09 (0.19-3.65)        | 1.26 (0.12-5.21)        | 1.05 (0.13-3.99)        |
| LFOP | XIB   | 0.76 (0.51-1.07)        | 0.74 (0.39-1.26)        | 0.74 (0.39-1.26)        | 1.09 (0.63-1.78)        | 1.15 (0.42-2.54)        | 0.99 (0.41-2.03)        |
| LFOP | XIC   | 3.19 (0.88-8.64)        | 3.14 (0.64-9.78)        | 3.20 (0.65-9.97)        | 0.61 (0.14-1.79)        | 0.60 (0.07-2.34)        | 0.59 (0.08-2.09)        |
| LFOP | XO    | <b>0.63 (0.46-0.85)</b> | <b>0.59 (0.33-0.95)</b> | <b>0.60 (0.33-0.97)</b> | 0.77 (0.46-1.20)        | 0.73 (0.27-1.59)        | 0.74 (0.31-1.47)        |
| LFOP | XOB   | 0.69 (0.44-1.03)        | 0.68 (0.34-1.20)        | 0.68 (0.34-1.21)        | 0.76 (0.36-1.41)        | 0.80 (0.24-2.00)        | 0.70 (0.24-1.61)        |
| LFOP | XOC   | <b>3.80 (1.18-9.66)</b> | 3.7 (0.92-10.55)        | 3.77 (0.93-10.7)        | 1.02 (0.27-2.71)        | 1.11 (0.17-3.85)        | 1.06 (0.20-3.39)        |
| LFOP | XOBC  | 0.77 (0.45-1.24)        | 0.76 (0.29-1.63)        | 0.76 (0.29-1.64)        | 0.84 (0.30-1.88)        | 0.89 (0.15-2.86)        | 0.78 (0.17-2.27)        |
| LFOP | X     | <b>0.23 (0.11-0.45)</b> | <b>0.24 (0.08-0.56)</b> | <b>0.25 (0.08-0.57)</b> | <b>0.28 (0.10-0.61)</b> | <b>0.31 (0.06-0.92)</b> | <b>0.28 (0.07-0.76)</b> |
| LFOP | C     | <b>0.34 (0.12-0.75)</b> | 0.40 (0.08-1.18)        | 0.39 (0.08-1.15)        | <b>0.17 (0.08-0.33)</b> | <b>0.25 (0.04-0.83)</b> | <b>0.18 (0.04-0.53)</b> |
| LFOP | I     | <b>0.20 (0.11-0.33)</b> | <b>0.24 (0.09-0.51)</b> | <b>0.23 (0.09-0.49)</b> | <b>0.22 (0.13-0.36)</b> | <b>0.26 (0.08-0.63)</b> | <b>0.19 (0.07-0.43)</b> |
| LFOP | O     | <b>0.18 (0.05-0.43)</b> | <b>0.19 (0.05-0.51)</b> | <b>0.20 (0.05-0.53)</b> | <b>0.31 (0.18-0.50)</b> | <b>0.30 (0.09-0.73)</b> | <b>0.31 (0.11-0.68)</b> |
| LFOP | P     | <b>0.39 (0.13-0.90)</b> | 0.48 (0.08-1.57)        | 0.47 (0.08-1.55)        | <b>0.18 (0.08-0.35)</b> | 0.28 (0.03-1.06)        | <b>0.19 (0.03-0.64)</b> |
| LFOI | LFOIB | <b>1.60 (1.07-2.29)</b> | 1.73 (0.97-2.86)        | 1.68 (0.94-2.77)        | 2.33 (1.08-4.52)        | 2.80 (0.91-6.80)        | 2.36 (0.86-5.43)        |
| LFOI | LFOIC | 2.83 (0.91-6.95)        | 3.02 (0.86-7.95)        | 2.99 (0.85-7.86)        | -                       | -                       | -                       |
| LFOI | LFOIP | <b>5.97 (1.95-14.6)</b> | <b>6.21 (1.67-16.9)</b> | <b>6.21 (1.68-16.9)</b> | <b>17.1 (1.99-74.7)</b> | <b>18.6 (1.59-87.4)</b> | <b>17.6 (1.77-83.4)</b> |
| LFOI | LF    | <b>0.24 (0.16-0.36)</b> | <b>0.26 (0.14-0.45)</b> | <b>0.26 (0.13-0.44)</b> | <b>0.36 (0.22-0.54)</b> | <b>0.39 (0.16-0.82)</b> | <b>0.36 (0.17-0.68)</b> |
| LFOI | LFB   | 0.57 (0.26-1.07)        | 0.62 (0.22-1.44)        | 0.60 (0.20-1.39)        | 0.55 (0.20-1.26)        | 0.73 (0.14-2.30)        | 0.53 (0.13-1.57)        |
| LFOI | LFC   | <b>0.35 (0.16-0.69)</b> | <b>0.39 (0.12-0.96)</b> | <b>0.39 (0.12-0.97)</b> | -                       | -                       | -                       |
| LFOI | LFBC  | 0.62 (0.36-1.00)        | 0.67 (0.29-1.34)        | 0.65 (0.28-1.30)        | 0.99 (0.35-2.21)        | 1.43 (0.27-4.57)        | 1.04 (0.24-3.11)        |
| LFOI | LFP   | 1.00 (0.50-1.80)        | 1.24 (0.45-2.81)        | 1.19 (0.43-2.73)        | -                       | -                       | -                       |
| LFOI | CB    | 0.44 (0.09-1.34)        | 0.72 (0.08-2.80)        | 0.68 (0.08-2.66)        | -                       | -                       | -                       |
| LFOI | CI    | 1.02 (0.47-1.96)        | 1.36 (0.40-3.54)        | 1.29 (0.37-3.35)        | <b>0.37 (0.20-0.62)</b> | 0.56 (0.13-1.62)        | <b>0.34 (0.10-0.94)</b> |
| LFOI | CIB   | 1.23 (0.46-2.68)        | 1.89 (0.41-5.75)        | 1.79 (0.39-5.47)        | <b>0.42 (0.16-0.89)</b> | 0.73 (0.12-2.57)        | 0.43 (0.08-1.42)        |

| T1    | T2    | Overall response rate   |                         |                         | Disease control rate    |                         |                         |
|-------|-------|-------------------------|-------------------------|-------------------------|-------------------------|-------------------------|-------------------------|
|       |       | Fixed effects           | Random effects          | Meta-regression         | Fixed effects           | Random effects          | Meta-regression         |
| LFOI  | IO    | 0.65 (0.43-0.94)        | 0.73 (0.38-1.29)        | 0.72 (0.37-1.27)        | <b>0.44 (0.26-0.70)</b> | 0.52 (0.19-1.16)        | <b>0.39 (0.16-0.83)</b> |
| LFOI  | IOB   | 0.81 (0.32-1.69)        | 0.90 (0.26-2.27)        | 0.87 (0.25-2.20)        | <b>0.32 (0.07-0.86)</b> | 0.46 (0.06-1.65)        | 0.33 (0.05-1.14)        |
| LFOI  | IP    | 0.86 (0.39-1.67)        | 1.13 (0.33-2.95)        | 1.07 (0.31-2.79)        | <b>0.26 (0.13-0.46)</b> | 0.38 (0.09-1.11)        | <b>0.24 (0.06-0.65)</b> |
| LFOI  | FI    | <b>0.51 (0.29-0.83)</b> | 0.56 (0.22-1.19)        | 0.57 (0.22-1.22)        | <b>0.49 (0.24-0.89)</b> | 0.54 (0.14-1.48)        | 0.54 (0.17-1.31)        |
| LFOI  | XB    | <b>0.44 (0.22-0.78)</b> | 0.50 (0.19-1.11)        | 0.48 (0.18-1.07)        | 0.49 (0.19-1.05)        | 0.64 (0.14-1.92)        | 0.47 (0.12-1.29)        |
| LFOI  | XC    | 22.7 (0.16-70.9)        | 37.3 (0.15-93.1)        | 17.7 (0.14-90.1)        | 0.46 (0.04-1.94)        | 0.86 (0.03-4.61)        | 0.48 (0.03-2.49)        |
| LFOI  | XI    | 0.78 (0.14-2.40)        | 0.87 (0.13-3.03)        | 0.84 (0.12-2.89)        | 0.95 (0.16-3.21)        | 1.32 (0.13-5.56)        | 0.92 (0.11-3.61)        |
| LFOI  | XIB   | 0.81 (0.52-1.21)        | 0.87 (0.44-1.55)        | 0.83 (0.42-1.48)        | 0.95 (0.53-1.58)        | 1.21 (0.42-2.81)        | 0.87 (0.34-1.92)        |
| LFOI  | XIC   | 3.42 (0.91-9.38)        | 3.69 (0.73-11.8)        | 3.63 (0.71-11.5)        | 0.53 (0.11-1.59)        | 0.63 (0.07-2.59)        | 0.52 (0.07-1.91)        |
| LFOI  | XO    | <b>0.67 (0.44-0.99)</b> | 0.69 (0.36-1.21)        | 0.68 (0.35-1.19)        | 0.67 (0.38-1.10)        | 0.77 (0.26-1.81)        | 0.66 (0.26-1.42)        |
| LFOI  | XOB   | 0.74 (0.44-1.16)        | 0.79 (0.38-1.48)        | 0.76 (0.36-1.43)        | 0.66 (0.30-1.25)        | 0.84 (0.23-2.21)        | 0.62 (0.20-1.53)        |
| LFOI  | XOC   | 4.07 (1.22-10.6)        | 4.35 (1.04-12.8)        | 4.27 (1.01-12.4)        | 0.89 (0.23-2.41)        | 1.18 (0.17-4.28)        | 0.94 (0.17-3.12)        |
| LFOI  | XOBC  | 0.83 (0.45-1.39)        | 0.89 (0.33-1.98)        | 0.86 (0.31-1.91)        | 0.73 (0.25-1.66)        | 0.94 (0.16-3.12)        | 0.69 (0.15-2.12)        |
| LFOI  | X     | <b>0.25 (0.11-0.50)</b> | <b>0.29 (0.09-0.68)</b> | <b>0.28 (0.09-0.66)</b> | <b>0.24 (0.09-0.54)</b> | 0.32 (0.06-1.02)        | <b>0.24 (0.06-0.70)</b> |
| LFOI  | C     | <b>0.36 (0.12-0.82)</b> | 0.47 (0.10-1.42)        | 0.44 (0.09-1.33)        | <b>0.15 (0.07-0.29)</b> | <b>0.26 (0.05-0.86)</b> | <b>0.15 (0.03-0.49)</b> |
| LFOI  | I     | <b>0.22 (0.11-0.37)</b> | <b>0.28 (0.10-0.62)</b> | <b>0.26 (0.10-0.58)</b> | <b>0.19 (0.11-0.32)</b> | <b>0.27 (0.09-0.65)</b> | <b>0.17 (0.06-0.40)</b> |
| LFOI  | O     | <b>0.20 (0.05-0.47)</b> | <b>0.23 (0.05-0.62)</b> | <b>0.22 (0.05-0.62)</b> | <b>0.27 (0.15-0.46)</b> | <b>0.32 (0.09-0.82)</b> | <b>0.27 (0.09-0.64)</b> |
| LFOI  | P     | <b>0.42 (0.14-0.99)</b> | 0.56 (0.09-1.90)        | 0.53 (0.09-1.77)        | <b>0.15 (0.07-0.30)</b> | 0.29 (0.04-1.10)        | <b>0.17 (0.03-0.59)</b> |
| LFOIB | LFOIC | 1.82 (0.56-4.60)        | 1.85 (0.48-5.08)        | 1.89 (0.49-5.21)        | -                       | -                       | -                       |
| LFOIB | LFOIP | <b>3.88 (1.16-9.94)</b> | 3.88 (0.88-11.4)        | 3.99 (0.92-11.7)        | 8.41 (0.78-38.3)        | 8.61 (0.49-43.4)        | 9.27 (0.66-46.6)        |
| LFOIB | LF    | <b>0.15 (0.10-0.22)</b> | <b>0.15 (0.08-0.26)</b> | <b>0.16 (0.09-0.27)</b> | <b>0.17 (0.07-0.33)</b> | <b>0.17 (0.05-0.44)</b> | <b>0.18 (0.06-0.42)</b> |
| LFOIB | LFB   | <b>0.36 (0.18-0.65)</b> | <b>0.37 (0.14-0.81)</b> | <b>0.37 (0.13-0.81)</b> | <b>0.26 (0.08-0.64)</b> | 0.31 (0.05-1.00)        | <b>0.26 (0.05-0.78)</b> |
| LFOIB | LFC   | <b>0.23 (0.10-0.43)</b> | <b>0.24 (0.07-0.57)</b> | <b>0.24 (0.08-0.58)</b> | -                       | -                       | -                       |
| LFOIB | LFBC  | <b>0.39 (0.24-0.60)</b> | <b>0.40 (0.19-0.73)</b> | <b>0.40 (0.19-0.73)</b> | 0.46 (0.15-1.09)        | 0.59 (0.10-1.93)        | 0.49 (0.11-1.48)        |
| LFOIB | LFP   | 0.63 (0.32-1.12)        | 0.74 (0.28-1.61)        | 0.73 (0.28-1.62)        | -                       | -                       | -                       |
| LFOIB | CB    | <b>0.28 (0.06-0.84)</b> | 0.43 (0.05-1.67)        | 0.42 (0.05-1.62)        | -                       | -                       | -                       |
| LFOIB | CI    | 0.65 (0.30-1.22)        | 0.82 (0.24-2.09)        | 0.80 (0.23-2.03)        | <b>0.18 (0.07-0.37)</b> | <b>0.24 (0.04-0.81)</b> | <b>0.17 (0.04-0.52)</b> |
| LFOIB | CIB   | 0.78 (0.29-1.68)        | 1.13 (0.25-3.39)        | 1.10 (0.24-3.32)        | <b>0.20 (0.06-0.49)</b> | 0.32 (0.04-1.23)        | <b>0.22 (0.03-0.76)</b> |
| LFOIB | IO    | <b>0.41 (0.28-0.58)</b> | <b>0.44 (0.23-0.76)</b> | <b>0.44 (0.23-0.77)</b> | <b>0.21 (0.09-0.43)</b> | <b>0.23 (0.06-0.62)</b> | <b>0.20 (0.06-0.50)</b> |
| LFOIB | IOB   | 0.51 (0.22-1.03)        | 0.53 (0.17-1.29)        | 0.53 (0.17-1.28)        | <b>0.15 (0.03-0.42)</b> | <b>0.19 (0.02-0.69)</b> | <b>0.16 (0.02-0.54)</b> |
| LFOIB | IP    | 0.55 (0.25-1.05)        | 0.68 (0.20-1.74)        | 0.66 (0.19-1.69)        | <b>0.12 (0.05-0.27)</b> | <b>0.17 (0.03-0.55)</b> | <b>0.12 (0.02-0.36)</b> |
| LFOIB | FI    | <b>0.32 (0.19-0.52)</b> | <b>0.33 (0.13-0.70)</b> | <b>0.35 (0.14-0.75)</b> | <b>0.24 (0.09-0.52)</b> | <b>0.24 (0.04-0.75)</b> | <b>0.27 (0.06-0.77)</b> |
| LFOIB | XB    | <b>0.28 (0.15-0.48)</b> | <b>0.30 (0.12-0.63)</b> | <b>0.30 (0.12-0.63)</b> | <b>0.23 (0.07-0.57)</b> | <b>0.28 (0.05-0.89)</b> | <b>0.23 (0.05-0.70)</b> |
| LFOIB | XC    | 14.3 (0.10-44.9)        | 21.9 (0.09-55.9)        | 11.0 (0.09-55.3)        | <b>0.22 (0.02-0.97)</b> | 0.38 (0.01-2.10)        | 0.24 (0.01-1.29)        |
| LFOIB | XI    | 0.49 (0.09-1.50)        | 0.52 (0.08-1.76)        | 0.51 (0.08-1.74)        | 0.45 (0.07-1.60)        | 0.57 (0.05-2.49)        | 0.46 (0.05-1.85)        |
| LFOIB | XIB   | <b>0.51 (0.35-0.72)</b> | <b>0.52 (0.29-0.86)</b> | <b>0.51 (0.28-0.85)</b> | <b>0.45 (0.19-0.90)</b> | 0.52 (0.14-1.36)        | 0.43 (0.14-1.05)        |
| LFOIB | XIC   | 2.17 (0.59-5.89)        | 2.20 (0.45-6.89)        | 2.23 (0.45-7.00)        | <b>0.26 (0.05-0.83)</b> | 0.28 (0.02-1.20)        | 0.26 (0.03-1.02)        |
| LFOIB | XO    | <b>0.43 (0.29-0.61)</b> | <b>0.41 (0.22-0.70)</b> | <b>0.42 (0.22-0.71)</b> | <b>0.32 (0.13-0.66)</b> | <b>0.34 (0.08-0.93)</b> | <b>0.33 (0.09-0.83)</b> |
| LFOIB | XOB   | <b>0.47 (0.30-0.69)</b> | <b>0.47 (0.25-0.82)</b> | <b>0.47 (0.24-0.81)</b> | <b>0.31 (0.12-0.67)</b> | 0.36 (0.08-1.00)        | <b>0.30 (0.08-0.79)</b> |
| LFOIB | XOC   | 2.58 (0.79-6.62)        | 2.59 (0.64-7.43)        | 2.62 (0.64-7.53)        | 0.43 (0.09-1.27)        | 0.51 (0.06-2.01)        | 0.47 (0.07-1.69)        |

| T1    | T2    | Overall response rate   |                         |                         | Disease control rate    |                         |                         |
|-------|-------|-------------------------|-------------------------|-------------------------|-------------------------|-------------------------|-------------------------|
|       |       | Fixed effects           | Random effects          | Meta-regression         | Fixed effects           | Random effects          | Meta-regression         |
| LFOIB | XOBC  | <b>0.52 (0.31-0.84)</b> | 0.53 (0.21-1.12)        | 0.53 (0.20-1.12)        | <b>0.35 (0.10-0.86)</b> | 0.40 (0.06-1.39)        | 0.34 (0.06-1.07)        |
| LFOIB | X     | <b>0.16 (0.07-0.31)</b> | <b>0.17 (0.06-0.40)</b> | <b>0.17 (0.06-0.40)</b> | <b>0.12 (0.03-0.29)</b> | <b>0.14 (0.02-0.48)</b> | <b>0.12 (0.02-0.38)</b> |
| LFOIB | C     | <b>0.23 (0.08-0.52)</b> | <b>0.28 (0.06-0.84)</b> | <b>0.27 (0.06-0.81)</b> | <b>0.07 (0.03-0.17)</b> | <b>0.11 (0.02-0.42)</b> | <b>0.08 (0.01-0.26)</b> |
| LFOIB | I     | <b>0.14 (0.07-0.23)</b> | <b>0.17 (0.06-0.36)</b> | <b>0.16 (0.06-0.35)</b> | <b>0.09 (0.04-0.19)</b> | <b>0.12 (0.03-0.34)</b> | <b>0.09 (0.02-0.23)</b> |
| LFOIB | O     | <b>0.13 (0.03-0.30)</b> | <b>0.14 (0.03-0.37)</b> | <b>0.14 (0.03-0.38)</b> | <b>0.13 (0.05-0.27)</b> | <b>0.14 (0.03-0.41)</b> | <b>0.14 (0.03-0.37)</b> |
| LFOIB | P     | <b>0.27 (0.09-0.62)</b> | 0.34 (0.06-1.11)        | 0.33 (0.06-1.08)        | <b>0.07 (0.02-0.17)</b> | <b>0.13 (0.01-0.52)</b> | <b>0.08 (0.01-0.31)</b> |
| LFOIC | LFOIP | 2.76 (0.51-8.88)        | 2.84 (0.41-10.1)        | 2.86 (0.42-10.2)        | -                       | -                       | -                       |
| LFOIC | LF    | <b>0.11 (0.03-0.27)</b> | <b>0.11 (0.03-0.31)</b> | <b>0.12 (0.03-0.31)</b> | -                       | -                       | -                       |
| LFOIC | LFB   | <b>0.26 (0.06-0.71)</b> | <b>0.28 (0.05-0.87)</b> | <b>0.27 (0.05-0.85)</b> | -                       | -                       | -                       |
| LFOIC | LFC   | <b>0.16 (0.04-0.45)</b> | <b>0.18 (0.03-0.56)</b> | <b>0.18 (0.03-0.57)</b> | -                       | -                       | -                       |
| LFOIC | LFBC  | <b>0.28 (0.08-0.72)</b> | <b>0.30 (0.07-0.86)</b> | <b>0.29 (0.06-0.84)</b> | -                       | -                       | -                       |
| LFOIC | LFP   | 0.46 (0.12-1.21)        | 0.55 (0.11-1.70)        | 0.54 (0.11-1.65)        | -                       | -                       | -                       |
| LFOIC | CB    | <b>0.20 (0.03-0.74)</b> | 0.32 (0.02-1.41)        | 0.31 (0.02-1.37)        | -                       | -                       | -                       |
| LFOIC | CI    | 0.47 (0.11-1.28)        | 0.61 (0.10-2.01)        | 0.58 (0.10-1.95)        | -                       | -                       | -                       |
| LFOIC | CIB   | 0.56 (0.12-1.64)        | 0.84 (0.11-3.09)        | 0.81 (0.11-3.00)        | -                       | -                       | -                       |
| LFOIC | IO    | <b>0.30 (0.09-0.72)</b> | <b>0.33 (0.08-0.88)</b> | <b>0.32 (0.08-0.87)</b> | -                       | -                       | -                       |
| LFOIC | IOB   | 0.37 (0.08-1.06)        | 0.40 (0.07-1.31)        | 0.39 (0.07-1.29)        | -                       | -                       | -                       |
| LFOIC | IP    | 0.39 (0.09-1.09)        | 0.50 (0.08-1.66)        | 0.48 (0.08-1.62)        | -                       | -                       | -                       |
| LFOIC | FI    | <b>0.23 (0.06-0.59)</b> | <b>0.25 (0.05-0.74)</b> | <b>0.25 (0.05-0.76)</b> | -                       | -                       | -                       |
| LFOIC | XB    | <b>0.20 (0.05-0.53)</b> | <b>0.22 (0.05-0.68)</b> | <b>0.22 (0.04-0.66)</b> | -                       | -                       | -                       |
| LFOIC | XC    | 10.9 (0.05-32.1)        | 19.8 (0.05-40.8)        | 8.11 (0.04-40.8)        | -                       | -                       | -                       |
| LFOIC | XI    | 0.36 (0.04-1.33)        | 0.39 (0.04-1.58)        | 0.38 (0.03-1.55)        | -                       | -                       | -                       |
| LFOIC | XIB   | <b>0.37 (0.11-0.91)</b> | 0.39 (0.10-1.05)        | 0.37 (0.09-1.02)        | -                       | -                       | -                       |
| LFOIC | XIC   | 1.56 (0.25-5.28)        | 1.65 (0.20-6.30)        | 1.63 (0.20-6.29)        | -                       | -                       | -                       |
| LFOIC | XO    | <b>0.31 (0.09-0.76)</b> | <b>0.31 (0.08-0.83)</b> | <b>0.30 (0.08-0.83)</b> | -                       | -                       | -                       |
| LFOIC | XOB   | <b>0.34 (0.10-0.85)</b> | <b>0.35 (0.08-0.98)</b> | <b>0.34 (0.08-0.96)</b> | -                       | -                       | -                       |
| LFOIC | XOC   | 1.86 (0.33-6.08)        | 1.94 (0.27-7.02)        | 1.92 (0.27-6.95)        | -                       | -                       | -                       |
| LFOIC | XOBC  | <b>0.38 (0.10-0.97)</b> | 0.40 (0.08-1.20)        | 0.39 (0.08-1.18)        | -                       | -                       | -                       |
| LFOIC | X     | <b>0.11 (0.03-0.32)</b> | <b>0.13 (0.02-0.41)</b> | <b>0.13 (0.02-0.40)</b> | -                       | -                       | -                       |
| LFOIC | C     | <b>0.16 (0.03-0.50)</b> | <b>0.21 (0.03-0.77)</b> | <b>0.20 (0.03-0.74)</b> | -                       | -                       | -                       |
| LFOIC | I     | <b>0.10 (0.03-0.26)</b> | <b>0.12 (0.03-0.37)</b> | <b>0.12 (0.02-0.36)</b> | -                       | -                       | -                       |
| LFOIC | O     | <b>0.09 (0.02-0.28)</b> | <b>0.10 (0.01-0.35)</b> | <b>0.10 (0.01-0.35)</b> | -                       | -                       | -                       |
| LFOIC | P     | <b>0.19 (0.04-0.59)</b> | <b>0.25 (0.03-1.00)</b> | <b>0.24 (0.03-0.96)</b> | -                       | -                       | -                       |
| LFOIP | LF    | <b>0.05 (0.01-0.13)</b> | <b>0.06 (0.01-0.17)</b> | <b>0.06 (0.01-0.17)</b> | <b>0.05 (0.00-0.19)</b> | <b>0.06 (0.00-0.27)</b> | <b>0.05 (0.00-0.22)</b> |
| LFOIP | LFB   | <b>0.12 (0.03-0.34)</b> | <b>0.14 (0.02-0.47)</b> | <b>0.14 (0.02-0.45)</b> | <b>0.08 (0.01-0.32)</b> | <b>0.12 (0.00-0.58)</b> | <b>0.08 (0.00-0.38)</b> |
| LFOIP | LFC   | <b>0.08 (0.02-0.22)</b> | <b>0.09 (0.01-0.31)</b> | <b>0.09 (0.01-0.31)</b> | -                       | -                       | -                       |
| LFOIP | LFBC  | <b>0.14 (0.04-0.35)</b> | <b>0.15 (0.03-0.47)</b> | <b>0.15 (0.03-0.46)</b> | <b>0.14 (0.01-0.58)</b> | 0.23 (0.01-1.15)        | <b>0.16 (0.01-0.74)</b> |
| LFOIP | LFP   | <b>0.22 (0.05-0.59)</b> | <b>0.28 (0.05-0.94)</b> | <b>0.27 (0.05-0.90)</b> | -                       | -                       | -                       |
| LFOIP | CB    | <b>0.10 (0.01-0.36)</b> | <b>0.16 (0.01-0.77)</b> | <b>0.15 (0.01-0.72)</b> | -                       | -                       | -                       |
| LFOIP | CI    | <b>0.22 (0.05-0.62)</b> | 0.31 (0.05-1.11)        | 0.29 (0.04-1.04)        | <b>0.05 (0.00-0.20)</b> | <b>0.09 (0.00-0.43)</b> | <b>0.05 (0.00-0.23)</b> |

| T1    | T2   | Overall response rate   |                         |                         | Disease control rate    |                         |                         |
|-------|------|-------------------------|-------------------------|-------------------------|-------------------------|-------------------------|-------------------------|
|       |      | Fixed effects           | Random effects          | Meta-regression         | Fixed effects           | Random effects          | Meta-regression         |
| LFOIP | CIB  | <b>0.27 (0.05-0.80)</b> | 0.43 (0.05-1.69)        | 0.41 (0.05-1.61)        | <b>0.06 (0.00-0.24)</b> | <b>0.12 (0.00-0.60)</b> | <b>0.07 (0.00-0.32)</b> |
| LFOIP | IO   | <b>0.14 (0.04-0.35)</b> | <b>0.17 (0.04-0.49)</b> | <b>0.16 (0.03-0.48)</b> | <b>0.06 (0.01-0.23)</b> | <b>0.08 (0.00-0.37)</b> | <b>0.06 (0.00-0.25)</b> |
| LFOIP | IOB  | <b>0.18 (0.04-0.51)</b> | <b>0.21 (0.03-0.72)</b> | <b>0.20 (0.03-0.69)</b> | <b>0.05 (0.00-0.20)</b> | <b>0.07 (0.00-0.39)</b> | <b>0.05 (0.00-0.25)</b> |
| LFOIP | IP   | <b>0.19 (0.04-0.52)</b> | <b>0.26 (0.04-0.92)</b> | <b>0.24 (0.04-0.86)</b> | <b>0.04 (0.00-0.14)</b> | <b>0.06 (0.00-0.29)</b> | <b>0.04 (0.00-0.16)</b> |
| LFOIP | FI   | <b>0.11 (0.03-0.29)</b> | <b>0.13 (0.02-0.40)</b> | <b>0.13 (0.02-0.41)</b> | <b>0.07 (0.01-0.27)</b> | <b>0.09 (0.00-0.41)</b> | <b>0.08 (0.00-0.35)</b> |
| LFOIP | XB   | <b>0.10 (0.02-0.26)</b> | <b>0.11 (0.02-0.37)</b> | <b>0.11 (0.02-0.36)</b> | <b>0.07 (0.01-0.28)</b> | <b>0.10 (0.00-0.50)</b> | <b>0.07 (0.00-0.32)</b> |
| LFOIP | XC   | 4.62 (0.02-15.3)        | 8.00 (0.02-20.3)        | 4.13 (0.02-20.5)        | <b>0.07 (0.00-0.36)</b> | <b>0.14 (0.00-0.87)</b> | <b>0.07 (0.00-0.45)</b> |
| LFOIP | XI   | <b>0.17 (0.02-0.63)</b> | <b>0.20 (0.02-0.85)</b> | <b>0.19 (0.02-0.81)</b> | <b>0.14 (0.01-0.66)</b> | 0.21 (0.00-1.19)        | <b>0.14 (0.00-0.73)</b> |
| LFOIP | XIB  | <b>0.18 (0.05-0.44)</b> | <b>0.20 (0.04-0.58)</b> | <b>0.19 (0.04-0.55)</b> | <b>0.14 (0.01-0.50)</b> | <b>0.19 (0.01-0.86)</b> | <b>0.13 (0.01-0.56)</b> |
| LFOIP | XIC  | 0.74 (0.12-2.55)        | 0.84 (0.09-3.38)        | 0.82 (0.09-3.27)        | <b>0.08 (0.00-0.35)</b> | <b>0.10 (0.00-0.56)</b> | <b>0.08 (0.00-0.41)</b> |
| LFOIP | XO   | <b>0.15 (0.04-0.37)</b> | <b>0.16 (0.03-0.46)</b> | <b>0.15 (0.03-0.45)</b> | <b>0.10 (0.01-0.36)</b> | <b>0.12 (0.01-0.55)</b> | <b>0.10 (0.01-0.42)</b> |
| LFOIP | XOB  | <b>0.16 (0.04-0.41)</b> | <b>0.18 (0.04-0.54)</b> | <b>0.17 (0.04-0.52)</b> | <b>0.09 (0.01-0.36)</b> | <b>0.13 (0.01-0.63)</b> | <b>0.09 (0.01-0.41)</b> |
| LFOIP | XOC  | 0.89 (0.15-2.94)        | 0.99 (0.12-3.77)        | 0.97 (0.12-3.64)        | <b>0.13 (0.01-0.56)</b> | 0.19 (0.01-1.00)        | <b>0.14 (0.01-0.71)</b> |
| LFOIP | XOBC | <b>0.18 (0.05-0.47)</b> | <b>0.20 (0.04-0.66)</b> | <b>0.20 (0.03-0.64)</b> | <b>0.11 (0.01-0.43)</b> | <b>0.15 (0.01-0.77)</b> | <b>0.10 (0.00-0.49)</b> |
| LFOIP | X    | <b>0.05 (0.01-0.15)</b> | <b>0.07 (0.01-0.22)</b> | <b>0.06 (0.01-0.21)</b> | <b>0.04 (0.00-0.14)</b> | <b>0.05 (0.00-0.26)</b> | <b>0.04 (0.00-0.17)</b> |
| LFOIP | C    | <b>0.08 (0.02-0.24)</b> | <b>0.11 (0.01-0.42)</b> | <b>0.10 (0.01-0.39)</b> | <b>0.02 (0.00-0.08)</b> | <b>0.04 (0.00-0.21)</b> | <b>0.02 (0.00-0.11)</b> |
| LFOIP | I    | <b>0.05 (0.01-0.12)</b> | <b>0.06 (0.01-0.21)</b> | <b>0.06 (0.01-0.19)</b> | <b>0.03 (0.00-0.10)</b> | <b>0.04 (0.00-0.19)</b> | <b>0.03 (0.00-0.11)</b> |
| LFOIP | O    | <b>0.04 (0.01-0.14)</b> | <b>0.05 (0.01-0.19)</b> | <b>0.05 (0.01-0.19)</b> | <b>0.04 (0.00-0.14)</b> | <b>0.05 (0.00-0.23)</b> | <b>0.04 (0.00-0.18)</b> |
| LFOIP | P    | <b>0.09 (0.02-0.29)</b> | <b>0.13 (0.01-0.54)</b> | <b>0.12 (0.01-0.50)</b> | <b>0.02 (0.00-0.09)</b> | <b>0.05 (0.00-0.25)</b> | <b>0.03 (0.00-0.13)</b> |
| LF    | LFB  | <b>2.39 (1.13-4.45)</b> | 2.52 (0.90-5.67)        | 2.45 (0.86-5.53)        | 1.59 (0.58-3.52)        | 1.98 (0.42-5.98)        | 1.57 (0.40-4.43)        |
| LF    | LFC  | 1.47 (0.76-2.58)        | 1.53 (0.61-3.25)        | 1.54 (0.60-3.26)        | -                       | -                       | -                       |
| LF    | LFBC | <b>2.61 (1.55-4.12)</b> | <b>2.72 (1.23-5.25)</b> | <b>2.65 (1.19-5.14)</b> | <b>2.84 (1.04-6.21)</b> | 3.87 (0.77-12.1)        | 3.04 (0.74-8.79)        |
| LF    | LFP  | <b>4.20 (2.17-7.35)</b> | <b>4.97 (1.93-10.8)</b> | <b>4.83 (1.85-10.5)</b> | -                       | -                       | -                       |
| LF    | CB   | 1.86 (0.38-5.57)        | 2.88 (0.34-11.1)        | 2.74 (0.32-10.6)        | -                       | -                       | -                       |
| LF    | CI   | <b>4.30 (2.03-8.06)</b> | <b>5.49 (1.67-13.8)</b> | <b>5.24 (1.58-13.2)</b> | 1.05 (0.60-1.71)        | 1.50 (0.39-4.14)        | 1.00 (0.31-2.57)        |
| LF    | CIB  | <b>5.16 (1.98-11.1)</b> | <b>7.58 (1.74-22.5)</b> | <b>7.27 (1.63-21.6)</b> | 1.19 (0.48-2.48)        | 1.96 (0.34-6.65)        | 1.26 (0.27-3.96)        |
| LF    | IO   | <b>2.72 (1.90-3.79)</b> | <b>2.95 (1.64-4.94)</b> | <b>2.90 (1.61-4.88)</b> | 1.27 (0.81-1.89)        | 1.39 (0.59-2.83)        | 1.15 (0.54-2.20)        |
| LF    | IOB  | <b>3.42 (1.40-7.02)</b> | <b>3.64 (1.10-8.99)</b> | <b>3.54 (1.07-8.78)</b> | 0.91 (0.21-2.46)        | 1.24 (0.17-4.36)        | 0.98 (0.16-3.23)        |
| LF    | IP   | <b>3.63 (1.67-6.92)</b> | <b>4.57 (1.39-11.5)</b> | <b>4.35 (1.30-11.0)</b> | 0.74 (0.39-1.28)        | 1.02 (0.26-2.83)        | 0.69 (0.21-1.77)        |
| LF    | FI   | <b>2.13 (1.25-3.41)</b> | 2.25 (0.91-4.66)        | 2.30 (0.93-4.82)        | 1.41 (0.73-2.46)        | 1.46 (0.41-3.74)        | 1.58 (0.53-3.64)        |
| LF    | XB   | 1.86 (0.97-3.23)        | 2.03 (0.79-4.34)        | 1.97 (0.76-4.22)        | 1.41 (0.56-2.89)        | 1.71 (0.42-4.73)        | 1.38 (0.39-3.52)        |
| LF    | XC   | 90.4 (0.67-297)         | 147 (0.60-369)          | 74.0 (0.56-370)         | 1.30 (0.12-5.51)        | 2.32 (0.1-12.23)        | 1.41 (0.08-7.09)        |
| LF    | XI   | 3.28 (0.61-10.1)        | 3.53 (0.52-12.2)        | 3.40 (0.5-11.69)        | 2.70 (0.46-9.05)        | 3.56 (0.37-14.5)        | 2.70 (0.33-10.4)        |
| LF    | XIB  | <b>3.41 (2.25-4.96)</b> | <b>3.52 (1.88-6.04)</b> | <b>3.39 (1.79-5.83)</b> | 2.72 (1.60-4.33)        | 3.25 (1.29-6.94)        | 2.55 (1.13-5.19)        |
| LF    | XIC  | <b>14.4 (3.91-39.0)</b> | <b>14.8 (3.08-45.8)</b> | <b>14.7 (3.03-45.6)</b> | 1.51 (0.34-4.38)        | 1.66 (0.20-6.35)        | 1.49 (0.23-5.21)        |
| LF    | XO   | <b>2.83 (2.01-3.90)</b> | <b>2.76 (1.62-4.39)</b> | <b>2.73 (1.60-4.34)</b> | <b>1.90 (1.23-2.81)</b> | 2.01 (0.90-3.95)        | 1.88 (0.94-3.44)        |
| LF    | XOB  | <b>3.11 (1.92-4.78)</b> | <b>3.21 (1.60-5.79)</b> | <b>3.11 (1.54-5.64)</b> | 1.88 (0.90-3.48)        | 2.27 (0.70-5.65)        | 1.80 (0.64-4.20)        |
| LF    | XOC  | <b>17.1 (5.29-43.8)</b> | <b>17.5 (4.40-49.3)</b> | <b>17.3 (4.34-48.8)</b> | 2.52 (0.70-6.59)        | 3.08 (0.53-10.4)        | 2.69 (0.55-8.36)        |
| LF    | XOBC | <b>3.48 (1.96-5.73)</b> | <b>3.61 (1.37-7.79)</b> | <b>3.51 (1.32-7.59)</b> | 2.09 (0.75-4.66)        | 2.53 (0.46-8.10)        | 2.02 (0.46-5.95)        |
| LF    | X    | 1.06 (0.47-2.04)        | 1.15 (0.40-2.65)        | 1.13 (0.39-2.59)        | 0.69 (0.26-1.49)        | 0.86 (0.20-2.47)        | 0.71 (0.19-1.90)        |

| T1  | T2   | Overall response rate   |                         |                         | Disease control rate    |                  |                  |
|-----|------|-------------------------|-------------------------|-------------------------|-------------------------|------------------|------------------|
|     |      | Fixed effects           | Random effects          | Meta-regression         | Fixed effects           | Random effects   | Meta-regression  |
| LF  | C    | 1.52 (0.53-3.40)        | 1.87 (0.40-5.53)        | 1.79 (0.38-5.25)        | <b>0.43 (0.21-0.80)</b> | 0.70 (0.14-2.22) | 0.45 (0.11-1.34) |
| LF  | I    | 0.91 (0.49-1.52)        | 1.12 (0.44-2.38)        | 1.06 (0.41-2.26)        | <b>0.55 (0.33-0.86)</b> | 0.72 (0.27-1.62) | 0.49 (0.20-1.07) |
| LF  | O    | 0.83 (0.24-1.91)        | 0.90 (0.22-2.31)        | 0.90 (0.22-2.33)        | 0.76 (0.49-1.12)        | 0.81 (0.32-1.74) | 0.78 (0.35-1.51) |
| LF  | P    | 1.76 (0.58-4.10)        | 2.27 (0.39-7.41)        | 2.17 (0.38-7.04)        | <b>0.44 (0.20-0.85)</b> | 0.77 (0.11-2.89) | 0.48 (0.09-1.63) |
| LFB | LFC  | 0.69 (0.25-1.57)        | 0.76 (0.18-2.17)        | 0.79 (0.18-2.27)        | -                       | -                | -                |
| LFB | LFBC | 1.20 (0.55-2.30)        | 1.27 (0.43-2.97)        | 1.28 (0.42-3.03)        | 2.09 (0.60-5.34)        | 2.69 (0.39-9.53) | 2.50 (0.46-8.07) |
| LFB | LFP  | 1.95 (0.77-4.12)        | 2.36 (0.65-6.28)        | 2.37 (0.64-6.38)        | -                       | -                | -                |
| LFB | CB   | 0.87 (0.15-2.81)        | 1.38 (0.13-5.80)        | 1.35 (0.13-5.70)        | -                       | -                | -                |
| LFB | CI   | 2.00 (0.73-4.43)        | 2.63 (0.58-7.82)        | 2.59 (0.56-7.80)        | 0.80 (0.27-1.88)        | 1.14 (0.15-4.21) | 0.88 (0.15-2.92) |
| LFB | CIB  | 2.40 (0.73-5.91)        | 3.63 (0.62-12.3)        | 3.59 (0.6-12.25)        | 0.91 (0.24-2.45)        | 1.50 (0.14-6.26) | 1.11 (0.14-4.17) |
| LFB | IO   | 1.26 (0.61-2.34)        | 1.41 (0.49-3.23)        | 1.43 (0.50-3.32)        | 0.97 (0.34-2.19)        | 1.06 (0.20-3.34) | 1.02 (0.23-2.91) |
| LFB | IOB  | 1.58 (0.54-3.66)        | 1.70 (0.41-4.77)        | 1.71 (0.40-4.87)        | 0.68 (0.13-2.02)        | 0.86 (0.09-3.37) | 0.81 (0.10-2.95) |
| LFB | IP   | 1.69 (0.60-3.79)        | 2.18 (0.48-6.52)        | 2.14 (0.46-6.45)        | 0.57 (0.18-1.37)        | 0.78 (0.10-2.89) | 0.61 (0.10-2.02) |
| LFB | FI   | 0.99 (0.43-1.98)        | 1.07 (0.30-2.78)        | 1.14 (0.31-2.99)        | 1.08 (0.34-2.61)        | 1.11 (0.16-3.94) | 1.41 (0.25-4.48) |
| LFB | XB   | 0.86 (0.36-1.75)        | 0.95 (0.28-2.42)        | 0.95 (0.28-2.45)        | 1.05 (0.30-2.66)        | 1.23 (0.19-4.23) | 1.17 (0.22-3.64) |
| LFB | XC   | 42.0 (0.27-138)         | 73.2 (0.24-174)         | 35.4 (0.23-181)         | 1.00 (0.07-4.56)        | 1.76 (0.05-10.1) | 1.24 (0.05-6.70) |
| LFB | XI   | 1.51 (0.25-4.93)        | 1.64 (0.21-6.09)        | 1.64 (0.20-6.10)        | 2.01 (0.28-7.34)        | 2.50 (0.19-11.2) | 2.24 (0.22-9.20) |
| LFB | XIB  | 1.57 (0.78-2.85)        | 1.64 (0.63-3.54)        | 1.63 (0.62-3.57)        | 2.02 (0.80-4.23)        | 2.28 (0.56-6.31) | 2.12 (0.61-5.40) |
| LFB | XIC  | <b>6.63 (1.54-19.4)</b> | <b>6.99 (1.15-24.0)</b> | <b>7.15 (1.16-24.9)</b> | 1.15 (0.19-3.87)        | 1.25 (0.09-5.67) | 1.32 (0.12-5.42) |
| LFB | XO   | 1.32 (0.64-2.44)        | 1.32 (0.47-2.96)        | 1.35 (0.48-3.06)        | 1.46 (0.51-3.33)        | 1.55 (0.29-4.87) | 1.68 (0.39-4.79) |
| LFB | XOB  | 1.41 (0.73-2.50)        | 1.46 (0.60-3.01)        | 1.46 (0.60-3.04)        | 1.34 (0.58-2.64)        | 1.46 (0.42-3.72) | 1.40 (0.47-3.27) |
| LFB | XOC  | <b>7.90 (2.05-22.0)</b> | <b>8.24 (1.60-26.4)</b> | <b>8.40 (1.64-27.1)</b> | 1.92 (0.37-6.01)        | 2.32 (0.23-9.69) | 2.37 (0.29-9.01) |
| LFB | XOBC | 1.58 (0.76-2.94)        | 1.65 (0.53-3.99)        | 1.66 (0.52-4.02)        | 1.49 (0.49-3.49)        | 1.64 (0.28-5.40) | 1.57 (0.33-4.64) |
| LFB | X    | 0.49 (0.18-1.09)        | 0.54 (0.14-1.49)        | 0.55 (0.14-1.50)        | 0.52 (0.14-1.37)        | 0.63 (0.09-2.28) | 0.61 (0.10-2.01) |
| LFB | C    | 0.71 (0.20-1.79)        | 0.89 (0.15-3.02)        | 0.88 (0.14-2.99)        | <b>0.33 (0.10-0.83)</b> | 0.53 (0.06-2.14) | 0.40 (0.06-1.43) |
| LFB | I    | 0.42 (0.17-0.87)        | 0.53 (0.15-1.42)        | 0.52 (0.14-1.39)        | <b>0.42 (0.14-0.97)</b> | 0.55 (0.09-1.81) | 0.44 (0.09-1.31) |
| LFB | O    | 0.39 (0.09-1.02)        | 0.44 (0.08-1.36)        | 0.45 (0.08-1.40)        | 0.59 (0.20-1.37)        | 0.64 (0.10-2.18) | 0.71 (0.14-2.15) |
| LFB | P    | 0.82 (0.22-2.14)        | 1.09 (0.15-3.98)        | 1.07 (0.14-3.92)        | <b>0.33 (0.10-0.86)</b> | 0.59 (0.05-2.65) | 0.43 (0.05-1.68) |
| LFC | LFBC | 1.96 (0.83-3.97)        | 2.13 (0.60-5.49)        | 2.07 (0.58-5.39)        | -                       | -                | -                |
| LFC | LFP  | <b>3.16 (1.21-6.81)</b> | 3.89 (0.99-10.8)        | 3.78 (0.94-10.6)        | -                       | -                | -                |
| LFC | CB   | 1.40 (0.24-4.56)        | 2.27 (0.20-9.73)        | 2.15 (0.19-9.26)        | -                       | -                | -                |
| LFC | CI   | <b>3.24 (1.15-7.27)</b> | 4.32 (0.89-13.3)        | 4.11 (0.84-12.7)        | -                       | -                | -                |
| LFC | CIB  | <b>3.88 (1.17-9.71)</b> | 5.96 (0.96-20.9)        | 5.71 (0.91-19.9)        | -                       | -                | -                |
| LFC | IO   | 2.05 (0.95-3.86)        | 2.31 (0.74-5.55)        | 2.27 (0.73-5.50)        | -                       | -                | -                |
| LFC | IOB  | 2.57 (0.82-6.19)        | 2.85 (0.59-8.64)        | 2.77 (0.57-8.41)        | -                       | -                | -                |
| LFC | IP   | 2.73 (0.95-6.19)        | 3.58 (0.74-11.0)        | 3.41 (0.69-10.5)        | -                       | -                | -                |
| LFC | FI   | 1.60 (0.67-3.25)        | 1.77 (0.46-4.76)        | 1.81 (0.46-4.92)        | -                       | -                | -                |
| LFC | XB   | 1.40 (0.54-3.00)        | 1.59 (0.40-4.36)        | 1.54 (0.38-4.26)        | -                       | -                | -                |
| LFC | XC   | 66.7 (0.44-224)         | 123 (0.37-291)          | 58.4 (0.35-289)         | -                       | -                | -                |
| LFC | XI   | 2.47 (0.39-8.26)        | 2.77 (0.30-10.8)        | 2.67 (0.29-10.4)        | -                       | -                | -                |



| T1   | T2   | Overall response rate   |                         |                         | Disease control rate    |                         |                         |
|------|------|-------------------------|-------------------------|-------------------------|-------------------------|-------------------------|-------------------------|
|      |      | Fixed effects           | Random effects          | Meta-regression         | Fixed effects           | Random effects          | Meta-regression         |
| LFC  | XIB  | <b>2.57 (1.15-4.97)</b> | 2.76 (0.86-6.69)        | 2.65 (0.82-6.44)        | -                       | -                       | -                       |
| LFC  | XIC  | <b>10.8 (2.39-32.0)</b> | <b>11.6 (1.73-41.5)</b> | <b>11.5 (1.70-41.1)</b> | -                       | -                       | -                       |
| LFC  | XO   | 2.13 (0.99-4.00)        | 2.16 (0.72-5.04)        | 2.14 (0.70-5.01)        | -                       | -                       | -                       |
| LFC  | XOB  | <b>2.34 (1.01-4.66)</b> | 2.51 (0.75-6.26)        | 2.43 (0.72-6.08)        | -                       | -                       | -                       |
| LFC  | XOC  | <b>12.9 (3.19-36.6)</b> | <b>13.7 (2.41-45.8)</b> | <b>13.5 (2.37-44.8)</b> | -                       | -                       | -                       |
| LFC  | XOBC | <b>2.62 (1.06-5.42)</b> | 2.83 (0.70-7.80)        | 2.75 (0.67-7.59)        | -                       | -                       | -                       |
| LFC  | X    | 0.79 (0.27-1.84)        | 0.90 (0.21-2.60)        | 0.88 (0.20-2.55)        | -                       | -                       | -                       |
| LFC  | C    | 1.14 (0.32-2.94)        | 1.47 (0.23-5.08)        | 1.40 (0.22-4.86)        | -                       | -                       | -                       |
| LFC  | I    | 0.68 (0.27-1.43)        | 0.88 (0.22-2.41)        | 0.83 (0.21-2.29)        | -                       | -                       | -                       |
| LFC  | O    | 0.62 (0.15-1.65)        | 0.71 (0.12-2.21)        | 0.70 (0.12-2.21)        | -                       | -                       | -                       |
| LFC  | P    | 1.33 (0.35-3.50)        | 1.78 (0.23-6.64)        | 1.70 (0.22-6.35)        | -                       | -                       | -                       |
| LFBC | LFP  | 1.68 (0.80-3.14)        | 2.02 (0.67-4.79)        | 2.01 (0.67-4.79)        | -                       | -                       | -                       |
| LFBC | CB   | 0.75 (0.14-2.30)        | 1.18 (0.12-4.73)        | 1.15 (0.12-4.65)        | -                       | -                       | -                       |
| LFBC | CI   | 1.73 (0.74-3.44)        | 2.24 (0.58-6.14)        | 2.20 (0.57-6.05)        | 0.45 (0.15-1.05)        | 0.60 (0.08-2.27)        | 0.47 (0.08-1.56)        |
| LFBC | CIB  | 2.07 (0.73-4.67)        | 3.09 (0.62-9.83)        | 3.05 (0.60-9.76)        | 0.51 (0.14-1.36)        | 0.79 (0.07-3.35)        | 0.59 (0.07-2.22)        |
| LFBC | IO   | 1.09 (0.66-1.71)        | 1.20 (0.53-2.39)        | 1.22 (0.53-2.43)        | 0.54 (0.19-1.23)        | 0.56 (0.10-1.80)        | 0.54 (0.12-1.57)        |
| LFBC | IOB  | 1.36 (0.54-2.82)        | 1.45 (0.42-3.66)        | 1.44 (0.42-3.65)        | 0.37 (0.07-1.08)        | 0.44 (0.05-1.71)        | 0.42 (0.06-1.47)        |
| LFBC | IP   | 1.46 (0.61-2.94)        | 1.86 (0.49-5.11)        | 1.82 (0.47-5.03)        | <b>0.32 (0.10-0.76)</b> | 0.41 (0.05-1.54)        | 0.32 (0.05-1.08)        |
| LFBC | FI   | 0.85 (0.45-1.48)        | 0.92 (0.31-2.12)        | 0.97 (0.32-2.26)        | 0.60 (0.19-1.45)        | 0.59 (0.08-2.11)        | 0.74 (0.13-2.38)        |
| LFBC | XB   | 0.74 (0.36-1.36)        | 0.82 (0.28-1.90)        | 0.82 (0.28-1.90)        | 0.59 (0.16-1.54)        | 0.67 (0.09-2.42)        | 0.63 (0.11-2.06)        |
| LFBC | XC   | 37.7 (0.26-120)         | 58.5 (0.23-153)         | 30.6 (0.22-153)         | 0.56 (0.04-2.54)        | 0.93 (0.02-5.29)        | 0.66 (0.02-3.55)        |
| LFBC | XI   | 1.31 (0.24-4.08)        | 1.42 (0.20-5.03)        | 1.41 (0.19-4.97)        | 1.13 (0.15-4.19)        | 1.37 (0.09-6.33)        | 1.21 (0.10-5.20)        |
| LFBC | XIB  | 1.36 (0.82-2.13)        | 1.42 (0.65-2.71)        | 1.40 (0.64-2.68)        | 1.14 (0.43-2.50)        | 1.24 (0.26-3.77)        | 1.15 (0.28-3.15)        |
| LFBC | XIC  | <b>5.75 (1.48-16.1)</b> | <b>6.02 (1.11-19.7)</b> | <b>6.12 (1.12-20.1)</b> | 0.65 (0.11-2.19)        | 0.67 (0.04-3.11)        | 0.70 (0.06-2.93)        |
| LFBC | XO   | 1.14 (0.69-1.78)        | 1.13 (0.51-2.18)        | 1.15 (0.51-2.22)        | 0.82 (0.29-1.86)        | 0.82 (0.14-2.66)        | 0.89 (0.19-2.60)        |
| LFBC | XOB  | 1.24 (0.72-1.99)        | 1.28 (0.58-2.50)        | 1.28 (0.57-2.49)        | 0.78 (0.27-1.81)        | 0.85 (0.16-2.71)        | 0.80 (0.18-2.30)        |
| LFBC | XOC  | <b>6.86 (1.98-18.1)</b> | <b>7.10 (1.57-21.4)</b> | <b>7.20 (1.59-21.8)</b> | 1.08 (0.21-3.39)        | 1.25 (0.11-5.35)        | 1.27 (0.15-4.92)        |
| LFBC | XOBC | 1.39 (0.74-2.37)        | 1.45 (0.50-3.32)        | 1.45 (0.50-3.31)        | 0.87 (0.24-2.30)        | 0.95 (0.11-3.59)        | 0.89 (0.14-3.03)        |
| LFBC | X    | 0.42 (0.18-0.86)        | 0.47 (0.14-1.17)        | 0.47 (0.14-1.18)        | <b>0.29 (0.08-0.79)</b> | 0.34 (0.04-1.30)        | 0.33 (0.05-1.11)        |
| LFBC | C    | 0.61 (0.20-1.43)        | 0.76 (0.15-2.42)        | 0.75 (0.14-2.37)        | <b>0.18 (0.06-0.46)</b> | 0.28 (0.03-1.15)        | <b>0.21 (0.03-0.77)</b> |
| LFBC | I    | <b>0.36 (0.18-0.66)</b> | 0.46 (0.15-1.09)        | 0.44 (0.15-1.06)        | <b>0.23 (0.08-0.54)</b> | <b>0.29 (0.05-0.98)</b> | <b>0.23 (0.05-0.71)</b> |
| LFBC | O    | <b>0.33 (0.09-0.82)</b> | 0.37 (0.08-1.07)        | 0.38 (0.08-1.10)        | <b>0.33 (0.11-0.76)</b> | 0.34 (0.05-1.16)        | 0.38 (0.07-1.15)        |
| LFBC | P    | 0.71 (0.22-1.71)        | 0.92 (0.14-3.19)        | 0.91 (0.14-3.14)        | <b>0.19 (0.05-0.48)</b> | 0.31 (0.02-1.40)        | <b>0.23 (0.02-0.90)</b> |
| LFP  | CB   | 0.48 (0.09-1.53)        | 0.68 (0.07-2.80)        | 0.66 (0.06-2.74)        | -                       | -                       | -                       |
| LFP  | CI   | 1.11 (0.43-2.38)        | 1.29 (0.30-3.73)        | 1.27 (0.29-3.65)        | -                       | -                       | -                       |
| LFP  | CIB  | 1.34 (0.43-3.17)        | 1.78 (0.32-5.89)        | 1.76 (0.31-5.80)        | -                       | -                       | -                       |
| LFP  | IO   | 0.70 (0.37-1.23)        | 0.69 (0.26-1.51)        | 0.71 (0.26-1.55)        | -                       | -                       | -                       |
| LFP  | IOB  | 0.88 (0.31-2.01)        | 0.85 (0.20-2.39)        | 0.85 (0.20-2.39)        | -                       | -                       | -                       |
| LFP  | IP   | 0.94 (0.36-2.02)        | 1.08 (0.25-3.11)        | 1.06 (0.24-3.05)        | -                       | -                       | -                       |
| LFP  | FI   | 0.55 (0.25-1.05)        | 0.53 (0.15-1.32)        | 0.56 (0.16-1.42)        | -                       | -                       | -                       |

| T1  | T2   | Overall response rate   |                         |                         | Disease control rate |                  |                  |
|-----|------|-------------------------|-------------------------|-------------------------|----------------------|------------------|------------------|
|     |      | Fixed effects           | Random effects          | Meta-regression         | Fixed effects        | Random effects   | Meta-regression  |
| LFP | XB   | <b>0.48 (0.20-0.96)</b> | 0.48 (0.14-1.21)        | 0.48 (0.14-1.21)        | -                    | -                | -                |
| LFP | XC   | 23.0 (0.16-77.3)        | 34.2 (0.12-87.3)        | 17.0 (0.12-89.3)        | -                    | -                | -                |
| LFP | XI   | 0.85 (0.14-2.75)        | 0.83 (0.10-3.08)        | 0.83 (0.10-3.05)        | -                    | -                | -                |
| LFP | XIB  | 0.88 (0.45-1.57)        | 0.83 (0.30-1.80)        | 0.82 (0.30-1.80)        | -                    | -                | -                |
| LFP | XIC  | 3.71 (0.88-10.7)        | 3.50 (0.57-12.0)        | 3.57 (0.57-12.1)        | -                    | -                | -                |
| LFP | XO   | 0.73 (0.38-1.27)        | 0.65 (0.25-1.38)        | 0.67 (0.25-1.42)        | -                    | -                | -                |
| LFP | XOB  | 0.80 (0.39-1.48)        | 0.75 (0.26-1.68)        | 0.75 (0.26-1.70)        | -                    | -                | -                |
| LFP | XOC  | <b>4.42 (1.18-12.2)</b> | 4.12 (0.80-13.1)        | 4.20 (0.81-13.3)        | -                    | -                | -                |
| LFP | XOBC | 0.90 (0.41-1.72)        | 0.85 (0.24-2.14)        | 0.85 (0.24-2.18)        | -                    | -                | -                |
| LFP | X    | <b>0.27 (0.10-0.59)</b> | <b>0.27 (0.07-0.73)</b> | <b>0.27 (0.07-0.73)</b> | -                    | -                | -                |
| LFP | C    | <b>0.39 (0.12-0.97)</b> | 0.44 (0.07-1.46)        | 0.43 (0.07-1.42)        | -                    | -                | -                |
| LFP | I    | <b>0.24 (0.10-0.46)</b> | <b>0.26 (0.08-0.67)</b> | <b>0.26 (0.07-0.65)</b> | -                    | -                | -                |
| LFP | O    | <b>0.21 (0.05-0.55)</b> | <b>0.22 (0.04-0.65)</b> | <b>0.22 (0.04-0.67)</b> | -                    | -                | -                |
| LFP | P    | 0.46 (0.13-1.16)        | 0.53 (0.07-1.92)        | 0.53 (0.07-1.86)        | -                    | -                | -                |
| CB  | CI   | 3.28 (0.88-8.89)        | 3.16 (0.62-9.94)        | 3.17 (0.62-9.96)        | -                    | -                | -                |
| CB  | CIB  | <b>3.66 (1.16-9.18)</b> | 3.80 (0.98-10.6)        | 3.82 (0.99-10.6)        | -                    | -                | -                |
| CB  | IO   | 2.28 (0.50-6.82)        | 2.11 (0.27-7.81)        | 2.19 (0.29-8.06)        | -                    | -                | -                |
| CB  | IOB  | 2.90 (0.47-9.95)        | 2.71 (0.23-11.7)        | 2.75 (0.23-11.8)        | -                    | -                | -                |
| CB  | IP   | 2.85 (0.66-8.32)        | 2.82 (0.43-9.86)        | 2.81 (0.43-9.84)        | -                    | -                | -                |
| CB  | FI   | 1.80 (0.35-5.73)        | 1.67 (0.17-6.74)        | 1.80 (0.18-7.31)        | -                    | -                | -                |
| CB  | XB   | 1.57 (0.29-5.09)        | 1.50 (0.15-6.20)        | 1.54 (0.15-6.29)        | -                    | -                | -                |
| CB  | XC   | 85.3 (0.38-230)         | 79.4 (0.26-197)         | 42.1 (0.27-227)         | -                    | -                | -                |
| CB  | XI   | 2.78 (0.26-11.6)        | 2.61 (0.13-13.0)        | 2.66 (0.13-13.1)        | -                    | -                | -                |
| CB  | XIB  | 2.89 (0.59-8.94)        | 2.62 (0.3-10.19)        | 2.64 (0.30-10.2)        | -                    | -                | -                |
| CB  | XIC  | <b>12.2 (1.47-47.2)</b> | 11.1 (0.70-52.3)        | 11.5 (0.72-54.0)        | -                    | -                | -                |
| CB  | XO   | 2.40 (0.50-7.41)        | 2.06 (0.24-7.91)        | 2.14 (0.25-8.24)        | -                    | -                | -                |
| CB  | XOB  | 2.64 (0.53-8.29)        | 2.39 (0.26-9.33)        | 2.43 (0.27-9.51)        | -                    | -                | -                |
| CB  | XOC  | <b>14.5 (1.91-54.5)</b> | 13.1 (0.95-59.2)        | 13.5 (0.97-61.4)        | -                    | -                | -                |
| CB  | XOBC | 2.95 (0.57-9.42)        | 2.68 (0.26-11.0)        | 2.75 (0.26-11.4)        | -                    | -                | -                |
| CB  | X    | 0.89 (0.15-3.00)        | 0.86 (0.08-3.59)        | 0.88 (0.08-3.70)        | -                    | -                | -                |
| CB  | C    | 1.16 (0.25-3.47)        | 1.08 (0.16-3.79)        | 1.09 (0.16-3.82)        | -                    | -                | -                |
| CB  | I    | 0.72 (0.18-2.05)        | 0.71 (0.12-2.44)        | 0.71 (0.11-2.41)        | -                    | -                | -                |
| CB  | O    | 0.71 (0.09-2.59)        | 0.68 (0.05-3.02)        | 0.71 (0.05-3.15)        | -                    | -                | -                |
| CB  | P    | 1.34 (0.28-4.09)        | 1.30 (0.16-4.89)        | 1.31 (0.16-4.96)        | -                    | -                | -                |
| CI  | CIB  | 1.20 (0.69-1.95)        | 1.37 (0.63-2.67)        | 1.38 (0.63-2.68)        | 1.14 (0.58-2.03)     | 1.30 (0.48-2.90) | 1.25 (0.51-2.62) |
| CI  | IO   | 0.70 (0.36-1.22)        | 0.67 (0.23-1.51)        | 0.69 (0.24-1.57)        | 1.25 (0.84-1.79)     | 1.18 (0.35-2.90) | 1.38 (0.49-3.00) |
| CI  | IOB  | 0.88 (0.29-2.10)        | 0.85 (0.16-2.66)        | 0.87 (0.16-2.70)        | 0.92 (0.20-2.58)     | 1.12 (0.11-4.58) | 1.25 (0.15-4.65) |
| CI  | IP   | 0.87 (0.50-1.41)        | 0.89 (0.40-1.72)        | 0.89 (0.40-1.72)        | 0.72 (0.48-1.04)     | 0.75 (0.28-1.61) | 0.73 (0.32-1.45) |
| CI  | FI   | 0.55 (0.24-1.10)        | 0.53 (0.13-1.45)        | 0.57 (0.14-1.59)        | 1.42 (0.66-2.69)     | 1.31 (0.22-4.22) | 2.02 (0.42-5.82) |
| CI  | XB   | 0.48 (0.19-1.01)        | 0.48 (0.11-1.35)        | 0.49 (0.11-1.38)        | 1.42 (0.51-3.13)     | 1.55 (0.23-5.39) | 1.75 (0.33-5.41) |

| T1  | T2   | Overall response rate   |                         |                         | Disease control rate    |                         |                         |
|-----|------|-------------------------|-------------------------|-------------------------|-------------------------|-------------------------|-------------------------|
|     |      | Fixed effects           | Random effects          | Meta-regression         | Fixed effects           | Random effects          | Meta-regression         |
| CI  | XC   | 29.3 (0.18-69.3)        | 23.5 (0.15-64.4)        | 14.2 (0.16-72.1)        | 1.24 (0.13-5.06)        | 1.53 (0.11-7.12)        | 1.40 (0.12-6.32)        |
| CI  | XI   | 0.85 (0.13-2.82)        | 0.83 (0.09-3.27)        | 0.84 (0.09-3.28)        | 2.73 (0.44-9.40)        | 3.20 (0.23-14.5)        | 3.42 (0.31-14.4)        |
| CI  | XIB  | 0.88 (0.41-1.68)        | 0.82 (0.24-2.09)        | 0.83 (0.24-2.09)        | <b>2.74 (1.40-4.86)</b> | 2.94 (0.64-8.60)        | 3.22 (0.88-8.46)        |
| CI  | XIC  | 3.72 (0.83-11.0)        | 3.51 (0.47-12.9)        | 3.64 (0.49-13.4)        | 1.53 (0.32-4.64)        | 1.54 (0.12-6.85)        | 1.93 (0.19-7.66)        |
| CI  | XO   | 0.73 (0.35-1.37)        | 0.65 (0.19-1.61)        | 0.68 (0.20-1.68)        | <b>1.93 (1.01-3.37)</b> | 1.86 (0.41-5.39)        | 2.44 (0.64-6.36)        |
| CI  | XOB  | 0.80 (0.36-1.58)        | 0.75 (0.21-1.95)        | 0.77 (0.21-1.99)        | 1.90 (0.81-3.79)        | 2.06 (0.37-6.65)        | 2.28 (0.52-6.56)        |
| CI  | XOC  | <b>4.43 (1.11-12.5)</b> | 4.14 (0.66-14.4)        | 4.28 (0.69-14.8)        | 2.56 (0.64-7.06)        | 2.85 (0.30-11.6)        | 3.49 (0.47-12.7)        |
| CI  | XOBC | 0.90 (0.38-1.84)        | 0.85 (0.19-2.41)        | 0.87 (0.19-2.47)        | 2.10 (0.69-4.98)        | 2.28 (0.26-8.66)        | 2.56 (0.40-8.75)        |
| CI  | X    | <b>0.27 (0.09-0.62)</b> | 0.27 (0.06-0.81)        | 0.28 (0.06-0.83)        | 0.70 (0.24-1.61)        | 0.79 (0.11-2.82)        | 0.90 (0.16-2.90)        |
| CI  | C    | <b>0.35 (0.18-0.62)</b> | 0.34 (0.14-0.66)        | 0.34 (0.14-0.67)        | <b>0.41 (0.26-0.62)</b> | <b>0.46 (0.21-0.90)</b> | <b>0.45 (0.22-0.82)</b> |
| CI  | I    | <b>0.22 (0.14-0.32)</b> | 0.23 (0.11-0.40)        | 0.22 (0.11-0.40)        | <b>0.53 (0.43-0.65)</b> | 0.56 (0.24-1.09)        | 0.55 (0.28-0.97)        |
| CI  | O    | <b>0.22 (0.05-0.57)</b> | 0.21 (0.03-0.71)        | 0.22 (0.03-0.74)        | 0.77 (0.39-1.39)        | 0.76 (0.14-2.38)        | 1.02 (0.24-2.80)        |
| CI  | P    | <b>0.41 (0.19-0.76)</b> | 0.41 (0.13-0.97)        | 0.41 (0.13-0.99)        | <b>0.42 (0.24-0.67)</b> | 0.51 (0.14-1.38)        | 0.48 (0.16-1.15)        |
| CIB | IO   | 0.62 (0.26-1.28)        | 0.56 (0.14-1.49)        | 0.57 (0.14-1.55)        | 1.21 (0.54-2.35)        | 1.12 (0.21-3.44)        | 1.31 (0.31-3.58)        |
| CIB | IOB  | 0.79 (0.22-2.07)        | 0.71 (0.10-2.44)        | 0.72 (0.11-2.51)        | 0.90 (0.16-2.79)        | 1.07 (0.07-4.79)        | 1.19 (0.11-4.92)        |
| CIB | IP   | 0.78 (0.35-1.52)        | 0.74 (0.23-1.78)        | 0.74 (0.23-1.79)        | 0.70 (0.31-1.35)        | 0.71 (0.16-2.00)        | 0.70 (0.19-1.79)        |
| CIB | FI   | 0.49 (0.17-1.12)        | 0.44 (0.08-1.36)        | 0.47 (0.08-1.49)        | 1.38 (0.48-3.15)        | 1.24 (0.15-4.62)        | 1.92 (0.28-6.43)        |
| CIB | XB   | 0.43 (0.14-1.01)        | 0.40 (0.07-1.26)        | 0.40 (0.07-1.30)        | 1.38 (0.39-3.51)        | 1.47 (0.15-5.80)        | 1.66 (0.23-5.91)        |
| CIB | XC   | 26.2 (0.15-62.5)        | 19.5 (0.11-52.8)        | 11.5 (0.11-60.7)        | 1.21 (0.11-5.18)        | 1.44 (0.08-7.19)        | 1.32 (0.09-6.36)        |
| CIB | XI   | 0.76 (0.11-2.66)        | 0.69 (0.06-2.91)        | 0.70 (0.06-2.95)        | 2.65 (0.36-9.81)        | 3.03 (0.16-14.8)        | 3.25 (0.23-14.7)        |
| CIB | XIB  | 0.79 (0.30-1.72)        | 0.69 (0.15-1.99)        | 0.69 (0.15-2.03)        | 2.66 (1.00-5.80)        | 2.79 (0.41-9.72)        | 3.06 (0.58-9.58)        |
| CIB | XIC  | 3.32 (0.65-10.5)        | 2.91 (0.31-11.5)        | 3.02 (0.32-12.0)        | 1.48 (0.26-4.92)        | 1.46 (0.08-7.03)        | 1.84 (0.14-7.85)        |
| CIB | XO   | 0.66 (0.25-1.41)        | 0.54 (0.12-1.54)        | 0.56 (0.12-1.62)        | 1.87 (0.71-4.05)        | 1.76 (0.26-6.06)        | 2.31 (0.42-7.14)        |
| CIB | XOB  | 0.72 (0.26-1.61)        | 0.63 (0.13-1.86)        | 0.64 (0.13-1.90)        | 1.84 (0.60-4.37)        | 1.95 (0.24-7.32)        | 2.17 (0.35-7.26)        |
| CIB | XOC  | 3.96 (0.86-12.0)        | 3.43 (0.43-12.9)        | 3.55 (0.44-13.3)        | 2.48 (0.51-7.61)        | 2.71 (0.2-12.17)        | 3.32 (0.33-13.2)        |
| CIB | XOBC | 0.80 (0.28-1.86)        | 0.73 (0.12-2.25)        | 0.72 (0.12-2.33)        | 2.04 (0.53-5.52)        | 2.16 (0.18-9.15)        | 2.43 (0.28-9.31)        |
| CIB | X    | <b>0.24 (0.07-0.62)</b> | <b>0.23 (0.04-0.74)</b> | <b>0.23 (0.04-0.77)</b> | 0.68 (0.18-1.79)        | 0.74 (0.07-3.00)        | 0.86 (0.11-3.14)        |
| CIB | C    | <b>0.32 (0.13-0.65)</b> | <b>0.28 (0.08-0.69)</b> | <b>0.28 (0.08-0.69)</b> | 0.40 (0.17-0.80)        | 0.44 (0.11-1.18)        | 0.42 (0.13-1.05)        |
| CIB | I    | <b>0.20 (0.10-0.36)</b> | <b>0.19 (0.06-0.43)</b> | <b>0.19 (0.06-0.43)</b> | 0.52 (0.25-0.95)        | 0.53 (0.13-1.41)        | 0.52 (0.16-1.26)        |
| CIB | O    | <b>0.19 (0.04-0.55)</b> | <b>0.18 (0.02-0.65)</b> | <b>0.19 (0.02-0.68)</b> | 0.75 (0.28-1.65)        | 0.72 (0.09-2.62)        | 0.97 (0.16-3.11)        |
| CIB | P    | <b>0.37 (0.14-0.78)</b> | <b>0.34 (0.08-0.94)</b> | <b>0.34 (0.08-0.96)</b> | <b>0.41 (0.17-0.84)</b> | 0.48 (0.09-1.59)        | 0.45 (0.10-1.32)        |
| IO  | IOB  | 1.27 (0.53-2.61)        | 1.29 (0.38-3.23)        | 1.27 (0.37-3.19)        | 0.74 (0.17-2.02)        | 1.00 (0.13-3.62)        | 0.93 (0.14-3.16)        |
| IO  | IP   | 1.34 (0.68-2.38)        | 1.56 (0.55-3.59)        | 1.51 (0.52-3.48)        | <b>0.59 (0.36-0.91)</b> | 0.77 (0.23-1.94)        | 0.61 (0.22-1.40)        |
| IO  | FI   | 0.79 (0.47-1.25)        | 0.80 (0.32-1.65)        | 0.83 (0.33-1.73)        | 1.14 (0.58-2.04)        | 1.16 (0.29-3.12)        | 1.50 (0.45-3.66)        |
| IO  | XB   | 0.69 (0.37-1.19)        | 0.72 (0.27-1.56)        | 0.71 (0.27-1.54)        | 1.14 (0.44-2.41)        | 1.38 (0.29-4.09)        | 1.30 (0.34-3.54)        |
| IO  | XC   | 37.8 (0.26-109)         | 47.7 (0.22-128)         | 25.1 (0.21-129)         | 1.03 (0.10-4.30)        | 1.74 (0.08-8.97)        | 1.25 (0.08-6.13)        |
| IO  | XI   | 1.22 (0.23-3.74)        | 1.25 (0.18-4.32)        | 1.23 (0.18-4.23)        | 2.20 (0.37-7.44)        | 2.84 (0.27-11.9)        | 2.55 (0.29-9.93)        |
| IO  | XIB  | 1.27 (0.86-1.82)        | 1.25 (0.64-2.18)        | 1.22 (0.62-2.13)        | <b>2.21 (1.25-3.66)</b> | 2.60 (0.89-6.07)        | 2.41 (0.95-5.22)        |
| IO  | XIC  | <b>5.36 (1.46-14.6)</b> | <b>5.28 (1.06-16.6)</b> | <b>5.30 (1.05-16.7)</b> | 1.24 (0.27-3.66)        | 1.36 (0.14-5.48)        | 1.43 (0.19-5.25)        |
| IO  | XO   | 1.06 (0.75-1.45)        | 0.98 (0.53-1.65)        | 0.99 (0.53-1.66)        | 1.56 (0.90-2.52)        | 1.64 (0.56-3.78)        | 1.81 (0.71-3.85)        |

| T1  | T2   | Overall response rate   |                         |                         | Disease control rate    |                  |                         |
|-----|------|-------------------------|-------------------------|-------------------------|-------------------------|------------------|-------------------------|
|     |      | Fixed effects           | Random effects          | Meta-regression         | Fixed effects           | Random effects   | Meta-regression         |
| IO  | XOB  | 1.16 (0.73-1.75)        | 1.14 (0.55-2.09)        | 1.12 (0.53-2.07)        | 1.53 (0.70-2.90)        | 1.82 (0.49-4.83) | 1.71 (0.54-4.21)        |
| IO  | XOC  | <b>6.39 (1.97-16.4)</b> | <b>6.23 (1.51-17.9)</b> | <b>6.24 (1.51-18.0)</b> | 2.06 (0.54-5.54)        | 2.51 (0.36-9.07) | 2.59 (0.46-8.53)        |
| IO  | XOBC | 1.30 (0.74-2.11)        | 1.28 (0.47-2.79)        | 1.26 (0.46-2.77)        | 1.70 (0.59-3.85)        | 2.03 (0.33-6.81) | 1.91 (0.40-5.88)        |
| IO  | X    | <b>0.39 (0.18-0.76)</b> | <b>0.41 (0.14-0.96)</b> | <b>0.41 (0.13-0.95)</b> | 0.57 (0.20-1.25)        | 0.70 (0.14-2.15) | 0.67 (0.16-1.92)        |
| IO  | C    | 0.56 (0.21-1.20)        | 0.64 (0.16-1.78)        | 0.62 (0.15-1.70)        | <b>0.34 (0.19-0.58)</b> | 0.52 (0.12-1.55) | 0.40 (0.11-1.09)        |
| IO  | I    | <b>0.33 (0.20-0.51)</b> | <b>0.38 (0.18-0.72)</b> | <b>0.37 (0.17-0.69)</b> | <b>0.44 (0.32-0.59)</b> | 0.54 (0.24-1.06) | <b>0.44 (0.22-0.81)</b> |
| IO  | O    | <b>0.31 (0.09-0.72)</b> | <b>0.32 (0.07-0.87)</b> | <b>0.33 (0.07-0.88)</b> | 0.62 (0.35-1.04)        | 0.67 (0.19-1.72) | 0.76 (0.26-1.75)        |
| IO  | P    | 0.65 (0.23-1.44)        | 0.77 (0.15-2.40)        | 0.75 (0.15-2.30)        | <b>0.35 (0.17-0.62)</b> | 0.58 (0.09-2.05) | 0.43 (0.09-1.35)        |
| IOB | IP   | 1.24 (0.39-2.98)        | 1.62 (0.31-5.11)        | 1.58 (0.30-5.02)        | 1.18 (0.26-3.63)        | 1.53 (0.15-6.46) | 1.19 (0.14-4.66)        |
| IOB | FI   | 0.73 (0.27-1.59)        | 0.80 (0.19-2.24)        | 0.84 (0.20-2.36)        | 2.24 (0.49-6.91)        | 2.20 (0.22-9.06) | 2.78 (0.35-10.5)        |
| IOB | XB   | 0.63 (0.22-1.42)        | 0.71 (0.17-1.99)        | 0.71 (0.17-1.99)        | 2.21 (0.44-7.12)        | 2.49 (0.25-10.2) | 2.34 (0.30-8.98)        |
| IOB | XC   | 30.8 (0.19-102)         | 50.9 (0.16-128)         | 26.2 (0.16-133)         | 2.08 (0.12-10.3)        | 3.45 (0.07-20.6) | 2.45 (0.07-13.9)        |
| IOB | XI   | 1.11 (0.17-3.80)        | 1.23 (0.13-4.81)        | 1.22 (0.13-4.75)        | 4.23 (0.43-17.6)        | 5.10 (0.27-25.2) | 4.52 (0.30-21.0)        |
| IOB | XIB  | 1.16 (0.48-2.37)        | 1.23 (0.38-3.03)        | 1.22 (0.37-3.01)        | <b>4.25 (1.08-12.3)</b> | 4.65 (0.70-16.9) | 4.27 (0.77-14.4)        |
| IOB | XIC  | <b>4.89 (1.01-15.1)</b> | 5.23 (0.74-19.0)        | 5.32 (0.75-19.5)        | 2.41 (0.29-9.34)        | 2.51 (0.13-12.5) | 2.62 (0.18-12.0)        |
| IOB | XO   | 0.97 (0.40-1.99)        | 0.98 (0.29-2.43)        | 1.00 (0.30-2.48)        | 3.04 (0.74-9.06)        | 3.07 (0.40-11.6) | 3.33 (0.52-11.7)        |
| IOB | XOB  | 1.05 (0.42-2.19)        | 1.11 (0.34-2.78)        | 1.11 (0.33-2.78)        | 2.91 (0.69-8.82)        | 3.18 (0.44-11.9) | 2.97 (0.49-10.4)        |
| IOB | XOC  | <b>5.83 (1.34-17.2)</b> | <b>6.16 (1.03-21.0)</b> | <b>6.27 (1.04-21.4)</b> | 4.02 (0.57-14.8)        | 4.66 (0.32-21.8) | 4.72 (0.42-20.5)        |
| IOB | XOBC | 1.18 (0.45-2.54)        | 1.26 (0.31-3.48)        | 1.26 (0.30-3.51)        | 3.24 (0.63-10.6)        | 3.56 (0.32-15.3) | 3.33 (0.38-13.1)        |
| IOB | X    | 0.36 (0.11-0.87)        | 0.41 (0.09-1.19)        | 0.41 (0.09-1.21)        | 1.09 (0.20-3.60)        | 1.27 (0.12-5.43) | 1.22 (0.14-4.76)        |
| IOB | C    | 0.52 (0.13-1.40)        | 0.66 (0.10-2.35)        | 0.65 (0.10-2.31)        | 0.69 (0.15-2.18)        | 1.04 (0.08-4.71) | 0.78 (0.08-3.26)        |
| IOB | I    | <b>0.31 (0.11-0.69)</b> | 0.40 (0.09-1.13)        | 0.38 (0.09-1.10)        | 0.87 (0.21-2.62)        | 1.08 (0.13-4.21) | 0.86 (0.13-3.11)        |
| IOB | O    | <b>0.28 (0.06-0.79)</b> | 0.32 (0.05-1.07)        | 0.33 (0.05-1.09)        | 1.22 (0.29-3.66)        | 1.26 (0.14-5.03) | 1.40 (0.20-5.12)        |
| IOB | P    | 0.60 (0.15-1.66)        | 0.80 (0.10-3.07)        | 0.79 (0.10-3.01)        | 0.70 (0.14-2.24)        | 1.16 (0.07-5.68) | 0.84 (0.07-3.71)        |
| IP  | FI   | 0.66 (0.28-1.33)        | 0.63 (0.15-1.75)        | 0.69 (0.16-1.93)        | 2.04 (0.90-4.02)        | 1.95 (0.33-6.36) | 2.97 (0.60-8.72)        |
| IP  | XB   | 0.57 (0.22-1.22)        | 0.57 (0.13-1.63)        | 0.59 (0.13-1.68)        | 2.04 (0.70-4.62)        | 2.31 (0.34-8.14) | 2.57 (0.48-8.04)        |
| IP  | XC   | 32.6 (0.21-85.6)        | 30.0 (0.17-82.8)        | 18.8 (0.17-93.5)        | 1.80 (0.18-7.48)        | 2.49 (0.13-12.4) | 2.20 (0.15-10.5)        |
| IP  | XI   | 1.01 (0.16-3.36)        | 1.00 (0.10-3.97)        | 1.01 (0.10-4.01)        | 3.92 (0.61-13.7)        | 4.77 (0.33-21.8) | 5.03 (0.45-21.2)        |
| IP  | XIB  | 1.05 (0.48-2.03)        | 0.99 (0.28-2.51)        | 1.01 (0.29-2.56)        | <b>3.93 (1.89-7.31)</b> | 4.37 (0.94-13.0) | <b>4.73 (1.27-12.6)</b> |
| IP  | XIC  | 4.44 (0.98-13.3)        | 4.22 (0.57-15.5)        | 4.4 (0.59-16.19)        | 2.20 (0.44-6.79)        | 2.29 (0.17-10.2) | 2.84 (0.28-11.3)        |
| IP  | XO   | 0.88 (0.41-1.66)        | 0.78 (0.23-1.94)        | 0.82 (0.24-2.05)        | <b>2.77 (1.36-5.07)</b> | 2.76 (0.60-8.14) | 3.59 (0.92-9.53)        |
| IP  | XOB  | 0.96 (0.42-1.91)        | 0.91 (0.25-2.34)        | 0.93 (0.25-2.42)        | <b>2.72 (1.10-5.64)</b> | 3.06 (0.54-9.98) | 3.36 (0.75-9.80)        |
| IP  | XOC  | <b>5.29 (1.31-15.1)</b> | 4.97 (0.79-17.2)        | 5.18 (0.82-17.9)        | 3.67 (0.88-10.4)        | 4.24 (0.43-17.4) | 5.13 (0.68-18.8)        |
| IP  | XOBC | 1.07 (0.44-2.21)        | 1.02 (0.23-2.89)        | 1.05 (0.23-3.02)        | 3.02 (0.95-7.32)        | 3.4 (0.39-13.05) | 3.76 (0.57-13.0)        |
| IP  | X    | <b>0.33 (0.11-0.75)</b> | <b>0.33 (0.07-0.97)</b> | 0.34 (0.07-1.01)        | 1.01 (0.32-2.38)        | 1.17 (0.16-4.23) | 1.33 (0.23-4.35)        |
| IP  | C    | <b>0.44 (0.18-0.89)</b> | 0.44 (0.13-1.09)        | 0.44 (0.13-1.09)        | 0.60 (0.32-1.03)        | 0.75 (0.20-2.01) | 0.70 (0.23-1.71)        |
| IP  | I    | <b>0.26 (0.17-0.39)</b> | <b>0.27 (0.14-0.49)</b> | <b>0.27 (0.13-0.49)</b> | 0.76 (0.53-1.06)        | 0.83 (0.35-1.67) | 0.80 (0.39-1.48)        |
| IP  | O    | <b>0.26 (0.06-0.69)</b> | <b>0.26 (0.04-0.85)</b> | <b>0.27 (0.04-0.90)</b> | 1.11 (0.53-2.08)        | 1.13 (0.21-3.58) | 1.50 (0.35-4.18)        |
| IP  | P    | 0.50 (0.19-1.08)        | 0.53 (0.12-1.50)        | 0.54 (0.12-1.51)        | 0.61 (0.30-1.09)        | 0.84 (0.15-2.73) | 0.76 (0.18-2.19)        |
| FI  | XB   | 0.92 (0.43-1.72)        | 1.03 (0.31-2.59)        | 0.98 (0.29-2.48)        | 1.08 (0.36-2.47)        | 1.54 (0.25-5.32) | 1.07 (0.22-3.35)        |

| T1 | T2   | Overall response rate   |                         |                         | Disease control rate    |                  |                  |
|----|------|-------------------------|-------------------------|-------------------------|-------------------------|------------------|------------------|
|    |      | Fixed effects           | Random effects          | Meta-regression         | Fixed effects           | Random effects   | Meta-regression  |
| FI | XC   | 49.5 (0.32-147)         | 80.8 (0.27-190)         | 36.6 (0.25-183)         | 1.00 (0.09-4.34)        | 2.07 (0.07-11.5) | 1.09 (0.05-5.82) |
| FI | XI   | 1.62 (0.29-5.11)        | 1.79 (0.23-6.66)        | 1.70 (0.21-6.24)        | 2.07 (0.32-7.29)        | 3.19 (0.24-14.5) | 2.10 (0.20-8.87) |
| FI | XIB  | 1.68 (0.96-2.73)        | 1.79 (0.69-3.82)        | 1.69 (0.64-3.63)        | 2.08 (0.99-3.90)        | 2.91 (0.70-8.35) | 1.98 (0.58-5.27) |
| FI | XIC  | <b>7.09 (1.79-20.1)</b> | <b>7.58 (1.27-25.6)</b> | <b>7.36 (1.22-25.1)</b> | 1.16 (0.23-3.61)        | 1.52 (0.12-6.70) | 1.17 (0.13-4.65) |
| FI | XO   | 1.40 (0.82-2.23)        | 1.41 (0.56-2.96)        | 1.37 (0.54-2.88)        | 1.47 (0.71-2.72)        | 1.84 (0.44-5.25) | 1.48 (0.44-3.81) |
| FI | XOB  | 1.53 (0.83-2.61)        | 1.63 (0.60-3.61)        | 1.55 (0.56-3.45)        | 1.44 (0.57-3.02)        | 2.03 (0.40-6.40) | 1.40 (0.34-4.07) |
| FI | XOC  | <b>8.46 (2.40-22.5)</b> | <b>8.93 (1.79-28.1)</b> | <b>8.66 (1.73-27.3)</b> | 1.94 (0.46-5.50)        | 2.82 (0.31-11.3) | 2.12 (0.31-7.70) |
| FI | XOBC | 1.72 (0.86-3.08)        | 1.84 (0.54-4.62)        | 1.75 (0.51-4.45)        | 1.60 (0.50-3.91)        | 2.26 (0.29-8.48) | 1.57 (0.26-5.35) |
| FI | X    | 0.52 (0.21-1.08)        | 0.59 (0.16-1.56)        | 0.56 (0.15-1.51)        | 0.53 (0.17-1.27)        | 0.78 (0.12-2.78) | 0.55 (0.10-1.80) |
| FI | C    | 0.75 (0.24-1.76)        | 0.95 (0.17-3.09)        | 0.89 (0.16-2.87)        | <b>0.33 (0.13-0.69)</b> | 0.62 (0.09-2.33) | 0.35 (0.06-1.20) |
| FI | I    | <b>0.45 (0.22-0.81)</b> | 0.57 (0.18-1.42)        | 0.53 (0.16-1.32)        | <b>0.42 (0.20-0.77)</b> | 0.64 (0.15-1.86) | 0.38 (0.10-1.05) |
| FI | O    | 0.41 (0.11-1.01)        | 0.47 (0.09-1.38)        | 0.45 (0.08-1.36)        | 0.59 (0.28-1.11)        | 0.75 (0.16-2.30) | 0.62 (0.16-1.68) |
| FI | P    | 0.87 (0.27-2.11)        | 1.16 (0.17-4.09)        | 1.08 (0.16-3.80)        | 0.34 (0.13-0.72)        | 0.69 (0.07-2.91) | 0.38 (0.05-1.43) |
| XB | XC   | 52.6 (0.36-173)         | 88.9 (0.30-216)         | 42.1 (0.29-214)         | 1.09 (0.08-4.95)        | 1.89 (0.06-10.6) | 1.33 (0.06-7.08) |
| XB | XI   | 1.87 (0.34-5.85)        | 1.95 (0.27-6.86)        | 1.92 (0.27-6.70)        | 2.18 (0.33-7.72)        | 2.64 (0.24-11.3) | 2.38 (0.26-9.50) |
| XB | XIB  | 1.94 (1.17-3.05)        | 1.94 (0.91-3.64)        | 1.92 (0.90-3.60)        | <b>2.19 (1.02-4.31)</b> | 2.42 (0.76-6.00) | 2.25 (0.81-5.19) |
| XB | XIC  | <b>8.30 (2.03-23.7)</b> | <b>8.44 (1.45-28.1)</b> | <b>8.60 (1.47-29.0)</b> | 1.25 (0.23-4.12)        | 1.32 (0.11-5.71) | 1.40 (0.15-5.52) |
| XB | XO   | 1.65 (0.89-2.81)        | 1.58 (0.64-3.27)        | 1.61 (0.65-3.34)        | 1.58 (0.64-3.36)        | 1.60 (0.40-4.46) | 1.77 (0.51-4.53) |
| XB | XOB  | 1.79 (0.96-3.05)        | 1.80 (0.72-3.75)        | 1.80 (0.72-3.75)        | 1.53 (0.57-3.39)        | 1.72 (0.40-5.01) | 1.62 (0.44-4.34) |
| XB | XOC  | <b>9.90 (2.72-26.8)</b> | <b>9.94 (2.05-30.6)</b> | <b>10.1 (2.08-31.4)</b> | 2.09 (0.45-6.34)        | 2.44 (0.29-9.59) | 2.53 (0.36-9.14) |
| XB | XOBC | 2.00 (0.99-3.60)        | 2.03 (0.64-4.88)        | 2.03 (0.64-4.88)        | 1.70 (0.50-4.33)        | 1.92 (0.28-6.84) | 1.81 (0.33-5.84) |
| XB | X    | 0.58 (0.30-1.00)        | 0.60 (0.26-1.20)        | 0.61 (0.26-1.22)        | <b>0.50 (0.30-0.79)</b> | 0.55 (0.20-1.21) | 0.55 (0.23-1.11) |
| XB | C    | 0.88 (0.27-2.17)        | 1.08 (0.19-3.53)        | 1.06 (0.18-3.49)        | <b>0.36 (0.12-0.87)</b> | 0.57 (0.07-2.22) | 0.43 (0.07-1.49) |
| XB | I    | 0.53 (0.23-1.03)        | 0.64 (0.19-1.63)        | 0.63 (0.18-1.59)        | 0.46 (0.17-1.01)        | 0.59 (0.12-1.85) | 0.47 (0.11-1.35) |
| XB | O    | 0.48 (0.12-1.23)        | 0.53 (0.10-1.60)        | 0.54 (0.10-1.65)        | 0.64 (0.24-1.43)        | 0.69 (0.13-2.20) | 0.76 (0.17-2.19) |
| XB | P    | 1.03 (0.29-2.60)        | 1.31 (0.18-4.66)        | 1.28 (0.18-4.59)        | <b>0.37 (0.11-0.91)</b> | 0.63 (0.05-2.74) | 0.46 (0.06-1.76) |
| XC | XI   | 0.88 (0.01-5.33)        | 0.97 (0.01-6.25)        | 0.97 (0.01-6.24)        | 5.19 (0.23-26.7)        | 6.63 (0.11-39.9) | 6.96 (0.16-39.5) |
| XC | XIB  | 0.92 (0.01-5.04)        | 0.97 (0.01-5.64)        | 0.97 (0.01-5.76)        | 5.23 (0.46-21.8)        | 6.09 (0.23-32.0) | 6.46 (0.33-31.4) |
| XC | XIC  | 3.92 (0.03-23.1)        | 4.13 (0.02-25.8)        | 4.24 (0.03-26.6)        | 2.93 (0.16-14.4)        | 3.20 (0.06-19.2) | 3.96 (0.10-22.3) |
| XC | XO   | 0.77 (0.01-4.18)        | 0.77 (0.01-4.41)        | 0.79 (0.01-4.64)        | 3.69 (0.33-15.4)        | 3.85 (0.15-20.1) | 4.90 (0.24-23.8) |
| XC | XOB  | 0.84 (0.01-4.58)        | 0.89 (0.01-5.13)        | 0.89 (0.01-5.33)        | 3.62 (0.30-15.5)        | 4.26 (0.14-23.1) | 4.57 (0.21-22.9) |
| XC | XOC  | 4.67 (0.04-27.2)        | 4.87 (0.03-29.9)        | 4.97 (0.03-30.5)        | 4.89 (0.30-23.1)        | 5.94 (0.13-34.6) | 7.08 (0.22-38.8) |
| XC | XOBC | 0.94 (0.01-5.19)        | 1.00 (0.01-5.90)        | 1.01 (0.01-6.13)        | 4.02 (0.29-18.0)        | 4.7 (0.12-26.89) | 5.12 (0.18-27.3) |
| XC | X    | 0.29 (0.00-1.60)        | 0.32 (0.00-1.91)        | 0.33 (0.00-2.00)        | 1.34 (0.10-5.97)        | 1.64 (0.05-9.15) | 1.82 (0.07-9.47) |
| XC | C    | 0.33 (0.01-1.67)        | 0.35 (0.01-1.82)        | 0.34 (0.00-1.77)        | 0.75 (0.08-2.88)        | 0.82 (0.07-3.45) | 0.80 (0.08-3.18) |
| XC | I    | 0.23 (0.00-1.22)        | 0.27 (0.00-1.50)        | 0.26 (0.00-1.48)        | 1.01 (0.10-4.02)        | 1.14 (0.06-5.48) | 1.09 (0.08-4.85) |
| XC | O    | 0.22 (0.00-1.31)        | 0.25 (0.00-1.56)        | 0.26 (0.00-1.63)        | 1.48 (0.13-6.16)        | 1.58 (0.05-8.44) | 2.06 (0.10-10.1) |
| XC | P    | 0.39 (0.01-1.96)        | 0.42 (0.01-2.27)        | 0.41 (0.01-2.25)        | 0.76 (0.08-2.94)        | 0.91 (0.06-4.19) | 0.86 (0.07-3.68) |
| XI | XIB  | 1.67 (0.35-5.19)        | 1.74 (0.31-5.79)        | 1.73 (0.31-5.81)        | 1.67 (0.32-5.20)        | 1.83 (0.25-6.57) | 1.76 (0.27-5.97) |
| XI | XIC  | 7.13 (0.83-28.4)        | 7.69 (0.63-34.1)        | 7.95 (0.64-35.2)        | 0.98 (0.09-4.14)        | 1.07 (0.04-5.57) | 1.14 (0.06-5.52) |

| T1  | T2   | Overall response rate   |                         |                         | Disease control rate    |                         |                         |
|-----|------|-------------------------|-------------------------|-------------------------|-------------------------|-------------------------|-------------------------|
|     |      | Fixed effects           | Random effects          | Meta-regression         | Fixed effects           | Random effects          | Meta-regression         |
| XI  | XO   | 1.42 (0.28-4.55)        | 1.44 (0.22-5.10)        | 1.48 (0.23-5.29)        | 1.23 (0.20-4.09)        | 1.30 (0.12-5.37)        | 1.45 (0.17-5.60)        |
| XI  | XOB  | 1.53 (0.31-4.91)        | 1.62 (0.26-5.64)        | 1.63 (0.26-5.68)        | 1.17 (0.19-3.85)        | 1.32 (0.14-5.21)        | 1.27 (0.16-4.72)        |
| XI  | XOC  | <b>8.50 (1.08-32.7)</b> | 9.05 (0.86-38.4)        | 9.34 (0.88-39.8)        | 1.63 (0.17-6.55)        | 1.98 (0.11-9.81)        | 2.06 (0.14-9.46)        |
| XI  | XOBC | 1.71 (0.33-5.58)        | 1.83 (0.25-6.77)        | 1.84 (0.25-6.90)        | 1.30 (0.18-4.62)        | 1.47 (0.11-6.59)        | 1.43 (0.13-5.94)        |
| XI  | X    | 0.52 (0.09-1.78)        | 0.59 (0.07-2.23)        | 0.59 (0.08-2.27)        | 0.44 (0.06-1.54)        | 0.52 (0.04-2.28)        | 0.51 (0.05-2.10)        |
| XI  | C    | 0.76 (0.10-2.81)        | 0.98 (0.08-4.30)        | 0.96 (0.08-4.26)        | <b>0.28 (0.04-0.97)</b> | 0.45 (0.03-2.18)        | 0.34 (0.03-1.52)        |
| XI  | I    | 0.45 (0.08-1.52)        | 0.58 (0.07-2.25)        | 0.57 (0.07-2.20)        | 0.35 (0.06-1.19)        | 0.46 (0.04-1.98)        | 0.38 (0.04-1.50)        |
| XI  | O    | 0.42 (0.05-1.58)        | 0.48 (0.04-2.00)        | 0.50 (0.04-2.12)        | 0.50 (0.08-1.67)        | 0.54 (0.04-2.33)        | 0.61 (0.06-2.45)        |
| XI  | P    | 0.88 (0.12-3.30)        | 1.19 (0.08-5.49)        | 1.17 (0.08-5.40)        | 0.28 (0.04-1.00)        | 0.50 (0.02-2.57)        | 0.37 (0.02-1.74)        |
| XIB | XIC  | <b>4.29 (1.18-11.6)</b> | 4.41 (0.91-13.7)        | 4.54 (0.93-14.2)        | 0.58 (0.13-1.74)        | 0.58 (0.06-2.33)        | 0.65 (0.09-2.34)        |
| XIB | XO   | 0.85 (0.57-1.22)        | 0.83 (0.45-1.41)        | 0.85 (0.46-1.46)        | 0.74 (0.40-1.24)        | 0.71 (0.24-1.63)        | 0.83 (0.32-1.73)        |
| XIB | XOB  | 0.92 (0.64-1.28)        | 0.93 (0.56-1.46)        | 0.94 (0.56-1.48)        | 0.70 (0.39-1.14)        | 0.72 (0.30-1.44)        | 0.72 (0.34-1.37)        |
| XIB | XOC  | <b>5.12 (1.59-13.1)</b> | <b>5.20 (1.31-14.8)</b> | <b>5.34 (1.33-15.2)</b> | 0.97 (0.25-2.64)        | 1.08 (0.16-3.84)        | 1.17 (0.21-3.81)        |
| XIB | XOBC | 1.03 (0.64-1.56)        | 1.05 (0.45-2.09)        | 1.06 (0.45-2.13)        | 0.78 (0.31-1.61)        | 0.80 (0.18-2.30)        | 0.81 (0.22-2.11)        |
| XIB | X    | <b>0.31 (0.15-0.58)</b> | <b>0.34 (0.13-0.74)</b> | <b>0.34 (0.13-0.75)</b> | <b>0.26 (0.10-0.53)</b> | <b>0.28 (0.07-0.77)</b> | <b>0.29 (0.09-0.73)</b> |
| XIB | C    | 0.46 (0.16-1.03)        | 0.56 (0.12-1.69)        | 0.56 (0.12-1.66)        | <b>0.17 (0.07-0.33)</b> | <b>0.24 (0.04-0.82)</b> | <b>0.19 (0.04-0.59)</b> |
| XIB | I    | <b>0.27 (0.14-0.46)</b> | 0.34 (0.13-0.74)        | <b>0.33 (0.12-0.72)</b> | <b>0.21 (0.11-0.36)</b> | <b>0.25 (0.08-0.63)</b> | <b>0.21 (0.07-0.49)</b> |
| XIB | O    | <b>0.25 (0.07-0.59)</b> | 0.27 (0.06-0.75)        | <b>0.28 (0.06-0.78)</b> | <b>0.30 (0.15-0.52)</b> | <b>0.29 (0.08-0.77)</b> | <b>0.35 (0.11-0.82)</b> |
| XIB | P    | 0.53 (0.17-1.24)        | 0.68 (0.11-2.26)        | 0.67 (0.12-2.23)        | <b>0.17 (0.07-0.35)</b> | 0.27 (0.03-1.05)        | <b>0.21 (0.03-0.71)</b> |
| XIC | XO   | <b>0.27 (0.07-0.69)</b> | 0.28 (0.06-0.81)        | <b>0.28 (0.06-0.82)</b> | 1.84 (0.45-5.08)        | 2.31 (0.34-8.12)        | 2.17 (0.39-7.10)        |
| XIC | XOB  | <b>0.30 (0.08-0.77)</b> | 0.33 (0.07-0.98)        | <b>0.32 (0.07-0.97)</b> | 1.86 (0.36-5.80)        | 2.78 (0.27-11.6)        | 2.19 (0.27-8.41)        |
| XIC | XOC  | 1.26 (0.79-1.91)        | 1.29 (0.67-2.26)        | 1.30 (0.68-2.27)        | 1.83 (0.96-3.21)        | 2.27 (0.86-5.07)        | 2.12 (0.90-4.43)        |
| XIC | XOBC | <b>0.33 (0.09-0.87)</b> | 0.36 (0.07-1.08)        | 0.35 (0.07-1.08)        | 2.05 (0.34-6.84)        | 3.02 (0.21-13.8)        | 2.40 (0.23-10.0)        |
| XIC | X    | <b>0.10 (0.02-0.29)</b> | <b>0.12 (0.02-0.40)</b> | <b>0.12 (0.02-0.40)</b> | 0.68 (0.12-2.23)        | 1.03 (0.09-4.40)        | 0.85 (0.09-3.40)        |
| XIC | C    | <b>0.15 (0.03-0.47)</b> | <b>0.20 (0.02-0.79)</b> | <b>0.19 (0.02-0.75)</b> | 0.43 (0.08-1.36)        | 0.88 (0.05-4.18)        | 0.56 (0.05-2.47)        |
| XIC | I    | <b>0.09 (0.02-0.24)</b> | <b>0.12 (0.02-0.40)</b> | <b>0.11 (0.02-0.38)</b> | 0.55 (0.12-1.64)        | 0.92 (0.09-3.80)        | 0.62 (0.08-2.37)        |
| XIC | O    | <b>0.08 (0.01-0.26)</b> | <b>0.10 (0.01-0.36)</b> | <b>0.10 (0.01-0.36)</b> | 0.76 (0.16-2.26)        | 1.05 (0.10-4.35)        | 0.98 (0.12-3.71)        |
| XIC | P    | <b>0.17 (0.03-0.55)</b> | 0.24 (0.02-1.02)        | <b>0.23 (0.02-0.97)</b> | 0.44 (0.08-1.40)        | 0.99 (0.05-4.98)        | 0.61 (0.04-2.82)        |
| XO  | XOB  | 1.11 (0.70-1.68)        | 1.20 (0.61-2.15)        | 1.18 (0.59-2.12)        | 1.02 (0.46-1.96)        | 1.24 (0.34-3.27)        | 1.03 (0.33-2.51)        |
| XO  | XOC  | <b>6.07 (1.97-15.2)</b> | <b>6.39 (1.78-17.2)</b> | <b>6.39 (1.78-17.2)</b> | 1.33 (0.41-3.29)        | 1.54 (0.33-4.61)        | 1.44 (0.35-4.05)        |
| XO  | XOBC | 1.24 (0.72-2.02)        | 1.35 (0.52-2.86)        | 1.32 (0.51-2.82)        | 1.13 (0.39-2.58)        | 1.37 (0.23-4.57)        | 1.15 (0.24-3.45)        |
| XO  | X    | <b>0.38 (0.17-0.70)</b> | <b>0.42 (0.16-0.92)</b> | <b>0.42 (0.16-0.91)</b> | <b>0.37 (0.14-0.79)</b> | 0.45 (0.11-1.22)        | 0.39 (0.11-1.01)        |
| XO  | C    | 0.54 (0.19-1.21)        | 0.70 (0.15-2.10)        | 0.68 (0.14-2.01)        | <b>0.24 (0.10-0.46)</b> | 0.38 (0.07-1.30)        | <b>0.26 (0.06-0.80)</b> |
| XO  | I    | <b>0.33 (0.18-0.54)</b> | <b>0.42 (0.16-0.91)</b> | <b>0.40 (0.16-0.87)</b> | <b>0.30 (0.16-0.50)</b> | <b>0.40 (0.12-0.99)</b> | <b>0.28 (0.10-0.67)</b> |
| XO  | O    | <b>0.30 (0.08-0.69)</b> | <b>0.34 (0.08-0.90)</b> | <b>0.34 (0.08-0.92)</b> | <b>0.41 (0.23-0.69)</b> | 0.46 (0.14-1.14)        | 0.45 (0.16-1.02)        |
| XO  | P    | 0.63 (0.21-1.46)        | 0.85 (0.15-2.80)        | 0.82 (0.14-2.70)        | <b>0.24 (0.10-0.48)</b> | 0.43 (0.05-1.66)        | <b>0.28 (0.05-0.97)</b> |
| XOB | XOC  | <b>5.65 (1.74-14.4)</b> | <b>5.73 (1.46-16.2)</b> | <b>5.85 (1.49-16.5)</b> | 1.48 (0.35-4.21)        | 1.68 (0.22-6.31)        | 1.78 (0.29-6.09)        |
| XOB | XOBC | 1.12 (0.83-1.48)        | 1.13 (0.58-2.00)        | 1.14 (0.57-2.01)        | 1.11 (0.57-1.98)        | 1.13 (0.35-2.70)        | 1.13 (0.41-2.49)        |
| XOB | X    | <b>0.35 (0.15-0.68)</b> | <b>0.38 (0.13-0.88)</b> | <b>0.38 (0.13-0.89)</b> | <b>0.40 (0.14-0.91)</b> | 0.45 (0.09-1.40)        | 0.45 (0.11-1.28)        |
| XOB | C    | 0.51 (0.17-1.17)        | 0.63 (0.13-1.91)        | 0.62 (0.12-1.90)        | <b>0.25 (0.10-0.56)</b> | 0.39 (0.05-1.41)        | <b>0.30 (0.06-0.97)</b> |

| T1   | T2   | Overall response rate   |                         |                         | Disease control rate    |                  |                         |
|------|------|-------------------------|-------------------------|-------------------------|-------------------------|------------------|-------------------------|
|      |      | Fixed effects           | Random effects          | Meta-regression         | Fixed effects           | Random effects   | Meta-regression         |
| XOB  | I    | <b>0.30 (0.15-0.54)</b> | <b>0.37 (0.13-0.85)</b> | <b>0.37 (0.13-0.84)</b> | <b>0.32 (0.14-0.63)</b> | 0.40 (0.10-1.13) | <b>0.33 (0.09-0.84)</b> |
| XOB  | O    | <b>0.28 (0.07-0.67)</b> | <b>0.31 (0.07-0.85)</b> | <b>0.31 (0.07-0.88)</b> | <b>0.45 (0.20-0.90)</b> | 0.47 (0.10-1.36) | 0.54 (0.14-1.39)        |
| XOB  | P    | 0.59 (0.18-1.40)        | 0.76 (0.12-2.56)        | 0.75 (0.12-2.53)        | <b>0.26 (0.09-0.58)</b> | 0.43 (0.04-1.77) | 0.32 (0.05-1.15)        |
| XOC  | XOBC | <b>0.26 (0.08-0.64)</b> | <b>0.28 (0.06-0.77)</b> | <b>0.27 (0.06-0.75)</b> | 1.12 (0.22-3.44)        | 1.33 (0.13-5.47) | 1.13 (0.14-4.24)        |
| XOC  | X    | <b>0.08 (0.02-0.22)</b> | <b>0.09 (0.02-0.29)</b> | <b>0.09 (0.02-0.28)</b> | 0.37 (0.07-1.12)        | 0.45 (0.05-1.75) | 0.40 (0.05-1.43)        |
| XOC  | C    | <b>0.12 (0.02-0.35)</b> | <b>0.15 (0.02-0.58)</b> | <b>0.15 (0.02-0.55)</b> | <b>0.24 (0.05-0.68)</b> | 0.39 (0.03-1.68) | 0.26 (0.03-1.04)        |
| XOC  | I    | <b>0.07 (0.02-0.18)</b> | <b>0.09 (0.02-0.28)</b> | <b>0.09 (0.02-0.27)</b> | <b>0.30 (0.08-0.81)</b> | 0.40 (0.05-1.48) | <b>0.29 (0.05-0.98)</b> |
| XOC  | O    | <b>0.06 (0.01-0.20)</b> | <b>0.07 (0.01-0.26)</b> | <b>0.07 (0.01-0.26)</b> | 0.42 (0.11-1.12)        | 0.46 (0.06-1.70) | 0.46 (0.08-1.54)        |
| XOC  | P    | <b>0.14 (0.03-0.42)</b> | <b>0.19 (0.02-0.75)</b> | <b>0.18 (0.02-0.71)</b> | <b>0.24 (0.05-0.70)</b> | 0.43 (0.03-2.02) | 0.28 (0.03-1.20)        |
| XOBC | X    | <b>0.32 (0.13-0.65)</b> | <b>0.37 (0.10-0.96)</b> | <b>0.37 (0.10-0.98)</b> | 0.40 (0.11-1.03)        | 0.53 (0.07-1.97) | 0.49 (0.08-1.68)        |
| XOBC | C    | 0.46 (0.15-1.10)        | 0.61 (0.10-2.00)        | 0.60 (0.10-2.00)        | <b>0.25 (0.07-0.63)</b> | 0.45 (0.04-1.91) | 0.33 (0.04-1.23)        |
| XOBC | I    | <b>0.28 (0.13-0.51)</b> | <b>0.36 (0.11-0.94)</b> | <b>0.35 (0.10-0.92)</b> | <b>0.32 (0.11-0.75)</b> | 0.46 (0.07-1.63) | 0.36 (0.07-1.14)        |
| XOBC | O    | <b>0.25 (0.07-0.63)</b> | <b>0.30 (0.06-0.91)</b> | <b>0.31 (0.06-0.94)</b> | 0.45 (0.15-1.05)        | 0.54 (0.08-1.94) | 0.58 (0.11-1.85)        |
| XOBC | P    | 0.54 (0.16-1.32)        | 0.74 (0.10-2.65)        | 0.73 (0.10-2.63)        | <b>0.26 (0.07-0.66)</b> | 0.50 (0.04-2.33) | 0.35 (0.04-1.44)        |
| X    | C    | 1.63 (0.44-4.26)        | 1.99 (0.31-6.79)        | 1.93 (0.31-6.57)        | 0.75 (0.23-1.88)        | 1.17 (0.13-4.71) | 0.86 (0.13-3.11)        |
| X    | I    | 0.97 (0.38-2.08)        | 1.19 (0.31-3.21)        | 1.14 (0.30-3.08)        | 0.95 (0.34-2.19)        | 1.22 (0.22-3.98) | 0.95 (0.21-2.84)        |
| X    | O    | 0.89 (0.20-2.41)        | 0.97 (0.17-3.05)        | 0.98 (0.17-3.12)        | 1.33 (0.46-3.09)        | 1.42 (0.24-4.70) | 1.53 (0.32-4.55)        |
| X    | P    | 1.89 (0.49-5.09)        | 2.41 (0.31-8.88)        | 2.34 (0.31-8.66)        | 0.76 (0.22-1.95)        | 1.31 (0.11-5.80) | 0.92 (0.11-3.63)        |
| C    | I    | 0.69 (0.31-1.36)        | 0.77 (0.25-1.87)        | 0.76 (0.25-1.84)        | 1.35 (0.81-2.13)        | 1.39 (0.41-3.43) | 1.37 (0.49-3.02)        |
| C    | O    | 0.67 (0.13-2.00)        | 0.74 (0.09-2.73)        | 0.76 (0.09-2.82)        | 1.97 (0.85-3.92)        | 1.91 (0.27-6.58) | 2.55 (0.47-7.83)        |
| C    | P    | 1.16 (0.84-1.56)        | 1.21 (0.59-2.21)        | 1.21 (0.59-2.22)        | 1.01 (0.76-1.32)        | 1.11 (0.41-2.43) | 1.07 (0.48-2.08)        |
| I    | O    | 0.98 (0.25-2.47)        | 0.95 (0.18-2.85)        | 1.00 (0.18-3.01)        | 1.46 (0.77-2.52)        | 1.37 (0.35-3.71) | 1.86 (0.55-4.55)        |
| I    | P    | 1.94 (0.79-3.94)        | 2.02 (0.50-5.48)        | 2.05 (0.51-5.55)        | 0.80 (0.44-1.33)        | 1.07 (0.21-3.33) | 0.97 (0.26-2.67)        |
| O    | P    | 2.79 (0.55-9.02)        | 3.50 (0.37-14.4)        | 3.41 (0.36-14.0)        | 0.60 (0.24-1.24)        | 1.13 (0.12-4.61) | 0.70 (0.11-2.56)        |

X, capecitabine; B, bevacizumab; C, cetuximab; F, 5-fluorouracil; I, irinotecan; L, leucovorin; O, oxaliplatin; P, panitumumab. Bold fonts indicate significant difference.

**Supplementary Table S5.** Hazard ratios and 95% credible intervals for pairwise estimates of overall survival and progression-free survival.

| T1   | T2    | Overall survival        |                         |                         | Progression-free survival |                         |                         |
|------|-------|-------------------------|-------------------------|-------------------------|---------------------------|-------------------------|-------------------------|
|      |       | Fixed effects           | Random effects          | Meta-regression         | Fixed effects             | Random effects          | Meta-regression         |
| LFI  | LFIB  | 0.98 (0.83-1.16)        | 0.92 (0.70-1.17)        | 0.92 (0.70-1.17)        | <b>0.69 (0.59-0.80)</b>   | <b>0.64 (0.47-0.87)</b> | <b>0.64 (0.47-0.87)</b> |
| LFI  | LFIC  | <b>0.81 (0.72-0.91)</b> | <b>0.75 (0.57-0.93)</b> | <b>0.75 (0.57-0.93)</b> | <b>0.75 (0.66-0.86)</b>   | <b>0.69 (0.50-0.93)</b> | <b>0.69 (0.50-0.93)</b> |
| LFI  | LFIP  | 0.93 (0.82-1.05)        | 0.92 (0.74-1.13)        | 0.92 (0.74-1.13)        | <b>0.85 (0.75-0.95)</b>   | 0.81 (0.61-1.06)        | 0.81 (0.61-1.06)        |
| LFI  | LFIBP | <b>0.69 (0.52-0.91)</b> | <b>0.67 (0.46-0.94)</b> | <b>0.67 (0.46-0.95)</b> | <b>0.56 (0.40-0.79)</b>   | <b>0.55 (0.35-0.87)</b> | <b>0.55 (0.35-0.87)</b> |
| LFI  | LFO   | <b>0.80 (0.71-0.89)</b> | <b>0.80 (0.67-0.96)</b> | <b>0.80 (0.67-0.97)</b> | <b>0.69 (0.61-0.78)</b>   | <b>0.68 (0.53-0.89)</b> | <b>0.68 (0.53-0.89)</b> |
| LFI  | LFOB  | 0.97 (0.78-1.19)        | 0.94 (0.69-1.27)        | 0.94 (0.69-1.27)        | <b>0.72 (0.60-0.85)</b>   | <b>0.70 (0.50-0.98)</b> | <b>0.70 (0.50-0.98)</b> |
| LFI  | LFOC  | <b>0.67 (0.56-0.81)</b> | <b>0.66 (0.49-0.87)</b> | <b>0.66 (0.50-0.87)</b> | <b>0.60 (0.50-0.70)</b>   | <b>0.60 (0.44-0.82)</b> | <b>0.60 (0.44-0.82)</b> |
| LFI  | LFOF  | <b>0.77 (0.65-0.91)</b> | <b>0.77 (0.59-0.99)</b> | <b>0.77 (0.59-0.99)</b> | <b>0.67 (0.58-0.79)</b>   | <b>0.67 (0.48-0.93)</b> | <b>0.67 (0.48-0.94)</b> |
| LFI  | LFOI  | 1.14 (0.93-1.39)        | 1.13 (0.85-1.51)        | 1.13 (0.85-1.50)        | 1.23 (1.02-1.48)          | 1.22 (0.86-1.74)        | 1.22 (0.86-1.73)        |
| LFI  | LFOIB | 1.14 (0.88-1.48)        | 0.99 (0.60-1.45)        | 0.99 (0.61-1.46)        | <b>0.75 (0.61-0.91)</b>   | <b>0.63 (0.41-0.94)</b> | <b>0.63 (0.41-0.94)</b> |
| LFI  | LFOIP | -                       | -                       | -                       | 1.38 (0.83-2.27)          | 1.37 (0.66-2.82)        | 1.37 (0.66-2.79)        |
| LFI  | LF    | 0.96 (0.75-1.24)        | 0.96 (0.66-1.41)        | 0.96 (0.66-1.40)        | 0.84 (0.66-1.07)          | 0.84 (0.51-1.36)        | 0.84 (0.52-1.36)        |
| LFI  | LFC   | 0.91 (0.64-1.29)        | 0.90 (0.53-1.55)        | 0.90 (0.53-1.55)        | 0.94 (0.68-1.30)          | 0.94 (0.47-1.85)        | 0.94 (0.48-1.87)        |
| LFI  | LFP   | 0.55 (0.26-1.14)        | 0.54 (0.24-1.21)        | 0.54 (0.24-1.21)        | 0.72 (0.46-1.15)          | 0.72 (0.36-1.44)        | 0.72 (0.36-1.44)        |
| LFI  | IO    | 0.90 (0.79-1.02)        | 0.90 (0.71-1.13)        | 0.90 (0.71-1.14)        | 0.94 (0.83-1.07)          | 0.94 (0.69-1.28)        | 0.94 (0.69-1.28)        |
| LFI  | IOB   | 1.26 (0.82-1.92)        | 1.22 (0.70-2.14)        | 1.22 (0.70-2.14)        | 0.79 (0.54-1.16)          | 0.77 (0.40-1.46)        | 0.77 (0.40-1.46)        |
| LFI  | XB    | <b>0.43 (0.24-0.79)</b> | <b>0.43 (0.20-0.92)</b> | <b>0.44 (0.20-0.92)</b> | 0.52 (0.27-1.00)          | 0.51 (0.20-1.31)        | 0.51 (0.20-1.30)        |
| LFI  | XIB   | 0.92 (0.75-1.13)        | 0.87 (0.61-1.20)        | 0.87 (0.61-1.20)        | <b>0.71 (0.60-0.84)</b>   | 0.68 (0.45-1.01)        | 0.68 (0.45-1.01)        |
| LFI  | XO    | <b>0.81 (0.70-0.95)</b> | 0.81 (0.62-1.07)        | 0.81 (0.62-1.07)        | <b>0.73 (0.63-0.86)</b>   | 0.72 (0.51-1.03)        | 0.72 (0.51-1.03)        |
| LFI  | XOB   | 0.89 (0.71-1.12)        | 0.84 (0.58-1.17)        | 0.84 (0.58-1.16)        | <b>0.69 (0.57-0.83)</b>   | 0.67 (0.45-1.00)        | 0.67 (0.45-1.00)        |
| LFI  | XOBC  | 0.78 (0.57-1.05)        | 0.73 (0.44-1.17)        | 0.73 (0.44-1.17)        | <b>0.56 (0.44-0.72)</b>   | 0.55 (0.30-1.00)        | 0.55 (0.30-1.00)        |
| LFI  | X     | <b>0.55 (0.33-0.91)</b> | 0.55 (0.29-1.02)        | 0.55 (0.29-1.02)        | 0.98 (0.54-1.79)          | 0.96 (0.44-2.15)        | 0.96 (0.43-2.13)        |
| LFIB | LFIC  | <b>0.83 (0.70-0.98)</b> | 0.81 (0.62-1.06)        | 0.81 (0.62-1.06)        | 1.10 (0.95-1.27)          | 1.07 (0.77-1.47)        | 1.07 (0.77-1.47)        |
| LFIB | LFIP  | 0.95 (0.78-1.15)        | 1.00 (0.76-1.34)        | 1.00 (0.76-1.34)        | <b>1.23 (1.03-1.48)</b>   | 1.26 (0.89-1.77)        | 1.26 (0.89-1.77)        |
| LFIB | LFIBP | 0.70 (0.51-0.98)        | 0.72 (0.47-1.13)        | 0.73 (0.47-1.13)        | 0.82 (0.57-1.19)          | 0.86 (0.50-1.49)        | 0.86 (0.50-1.49)        |
| LFIB | LFO   | <b>0.81 (0.67-0.98)</b> | 0.87 (0.67-1.18)        | 0.87 (0.67-1.18)        | 1.01 (0.85-1.20)          | 1.06 (0.77-1.49)        | 1.06 (0.77-1.49)        |
| LFIB | LFOB  | 0.99 (0.85-1.14)        | 1.02 (0.83-1.30)        | 1.03 (0.84-1.30)        | 1.05 (0.94-1.17)          | 1.09 (0.86-1.38)        | 1.09 (0.86-1.38)        |
| LFIB | LFOC  | <b>0.69 (0.54-0.87)</b> | 0.72 (0.52-1.02)        | 0.72 (0.52-1.02)        | 0.87 (0.72-1.05)          | 0.93 (0.66-1.32)        | 0.93 (0.66-1.32)        |
| LFIB | LFOF  | <b>0.79 (0.64-0.97)</b> | 0.84 (0.62-1.15)        | 0.84 (0.62-1.15)        | 0.98 (0.82-1.19)          | 1.05 (0.73-1.50)        | 1.05 (0.73-1.50)        |
| LFIB | LFOI  | 1.16 (0.89-1.51)        | 1.23 (0.85-1.84)        | 1.23 (0.85-1.83)        | <b>1.79 (1.41-2.29)</b>   | <b>1.90 (1.20-3.05)</b> | <b>1.90 (1.20-3.04)</b> |
| LFIB | LFOIB | 1.16 (0.95-1.42)        | 1.08 (0.73-1.46)        | 1.08 (0.74-1.46)        | 1.09 (0.95-1.25)          | 0.98 (0.72-1.32)        | 0.98 (0.71-1.32)        |
| LFIB | LFOIP | -                       | -                       | -                       | <b>2.00 (1.19-3.40)</b>   | 2.13 (0.97-4.70)        | 2.13 (0.98-4.65)        |
| LFIB | LF    | 0.98 (0.72-1.33)        | 1.04 (0.67-1.69)        | 1.04 (0.67-1.69)        | 1.22 (0.92-1.63)          | 1.31 (0.73-2.33)        | 1.31 (0.74-2.34)        |
| LFIB | LFC   | 0.93 (0.63-1.37)        | 0.98 (0.55-1.83)        | 0.98 (0.56-1.82)        | 1.38 (0.96-1.97)          | 1.47 (0.69-3.10)        | 1.47 (0.70-3.12)        |
| LFIB | LFP   | 0.56 (0.27-1.18)        | 0.59 (0.26-1.35)        | 0.59 (0.26-1.36)        | 1.06 (0.66-1.70)          | 1.13 (0.56-2.29)        | 1.12 (0.56-2.28)        |
| LFIB | IO    | 0.92 (0.74-1.13)        | 0.98 (0.71-1.40)        | 0.98 (0.71-1.40)        | <b>1.38 (1.14-1.67)</b>   | 1.46 (0.97-2.23)        | 1.46 (0.96-2.23)        |
| LFIB | IOB   | 1.28 (0.86-1.91)        | 1.33 (0.80-2.28)        | 1.33 (0.80-2.26)        | 1.15 (0.80-1.66)          | 1.20 (0.66-2.17)        | 1.20 (0.66-2.18)        |
| LFIB | XB    | <b>0.44 (0.24-0.82)</b> | 0.47 (0.21-1.04)        | 0.47 (0.21-1.05)        | 0.76 (0.39-1.47)          | 0.80 (0.30-2.10)        | 0.79 (0.30-2.08)        |
| LFIB | XIB   | 0.94 (0.83-1.06)        | 0.95 (0.76-1.19)        | 0.95 (0.76-1.19)        | 1.03 (0.95-1.12)          | 1.06 (0.80-1.41)        | 1.06 (0.80-1.41)        |
| LFIB | XO    | 0.83 (0.67-1.03)        | 0.88 (0.64-1.28)        | 0.89 (0.64-1.27)        | 1.07 (0.88-1.30)          | 1.13 (0.75-1.69)        | 1.13 (0.76-1.69)        |
| LFIB | XOB   | 0.91 (0.77-1.08)        | 0.91 (0.70-1.19)        | 0.91 (0.70-1.18)        | 1.00 (0.89-1.13)          | 1.05 (0.77-1.42)        | 1.05 (0.77-1.42)        |
| LFIB | XOBC  | 0.79 (0.61-1.03)        | 0.79 (0.51-1.23)        | 0.79 (0.51-1.22)        | 0.82 (0.68-1.00)          | 0.86 (0.50-1.48)        | 0.86 (0.50-1.48)        |



| T1    | T2    | Overall survival        |                         |                         | Progression-free survival |                         |                         |
|-------|-------|-------------------------|-------------------------|-------------------------|---------------------------|-------------------------|-------------------------|
|       |       | Fixed effects           | Random effects          | Meta-regression         | Fixed effects             | Random effects          | Meta-regression         |
| LFIB  | X     | <b>0.56 (0.33-0.96)</b> | 0.59 (0.31-1.16)        | 0.60 (0.31-1.16)        | 1.43 (0.77-2.64)          | 1.50 (0.66-3.43)        | 1.50 (0.66-3.41)        |
| LFIC  | LFIP  | 1.15 (0.98-1.35)        | 1.23 (0.93-1.69)        | 1.23 (0.93-1.69)        | 1.12 (0.95-1.33)          | 1.18 (0.81-1.72)        | 1.17 (0.80-1.72)        |
| LFIC  | LFIBP | 0.85 (0.63-1.15)        | 0.89 (0.59-1.38)        | 0.90 (0.59-1.39)        | 0.74 (0.52-1.07)          | 0.81 (0.47-1.41)        | 0.81 (0.47-1.40)        |
| LFIC  | LFO   | 0.98 (0.84-1.14)        | 1.07 (0.84-1.44)        | 1.07 (0.84-1.44)        | 0.92 (0.79-1.08)          | 1.00 (0.72-1.40)        | 1.00 (0.72-1.39)        |
| LFIC  | LFOB  | 1.19 (0.97-1.47)        | 1.26 (0.93-1.79)        | 1.26 (0.93-1.79)        | 0.95 (0.80-1.13)          | 1.02 (0.71-1.47)        | 1.02 (0.71-1.47)        |
| LFIC  | LFOC  | 0.83 (0.69-1.01)        | 0.89 (0.69-1.18)        | 0.89 (0.68-1.18)        | <b>0.79 (0.66-0.94)</b>   | 0.87 (0.64-1.20)        | 0.87 (0.64-1.20)        |
| LFIC  | LFOP  | 0.95 (0.79-1.15)        | 1.03 (0.76-1.45)        | 1.03 (0.77-1.45)        | 0.89 (0.75-1.07)          | 0.98 (0.67-1.45)        | 0.98 (0.67-1.45)        |
| LFIC  | LFOI  | <b>1.41 (1.12-1.77)</b> | <b>1.52 (1.07-2.26)</b> | <b>1.51 (1.07-2.25)</b> | <b>1.63 (1.30-2.05)</b>   | <b>1.78 (1.12-2.88)</b> | <b>1.78 (1.12-2.86)</b> |
| LFIC  | LFOIB | <b>1.41 (1.09-1.82)</b> | 1.33 (0.83-1.97)        | 1.33 (0.83-1.97)        | 0.99 (0.82-1.21)          | 0.92 (0.60-1.40)        | 0.92 (0.60-1.39)        |
| LFIC  | LFOIP | -                       | -                       | -                       | <b>1.82 (1.08-3.06)</b>   | 1.99 (0.91-4.42)        | 1.99 (0.91-4.36)        |
| LFIC  | LF    | 1.19 (0.90-1.57)        | 1.28 (0.84-2.08)        | 1.28 (0.84-2.07)        | 1.11 (0.85-1.46)          | 1.22 (0.69-2.19)        | 1.22 (0.69-2.20)        |
| LFIC  | LFC   | 1.12 (0.77-1.62)        | 1.21 (0.69-2.25)        | 1.21 (0.69-2.24)        | 1.25 (0.88-1.77)          | 1.37 (0.65-2.92)        | 1.37 (0.66-2.93)        |
| LFIC  | LFP   | 0.67 (0.32-1.42)        | 0.73 (0.32-1.67)        | 0.73 (0.32-1.68)        | 0.96 (0.60-1.54)          | 1.05 (0.52-2.18)        | 1.05 (0.51-2.17)        |
| LFIC  | IO    | 1.11 (0.94-1.31)        | 1.20 (0.89-1.72)        | 1.20 (0.89-1.72)        | <b>1.25 (1.05-1.49)</b>   | 1.37 (0.90-2.11)        | 1.37 (0.90-2.10)        |
| LFIC  | IOB   | <b>1.55 (1.01-2.38)</b> | 1.64 (0.94-2.97)        | 1.64 (0.94-2.96)        | 1.05 (0.71-1.54)          | 1.12 (0.59-2.18)        | 1.12 (0.58-2.16)        |
| LFIC  | XB    | 0.53 (0.29-0.98)        | 0.58 (0.26-1.28)        | 0.58 (0.27-1.29)        | 0.69 (0.35-1.33)          | 0.75 (0.29-1.96)        | 0.74 (0.28-1.96)        |
| LFIC  | XIB   | 1.14 (0.93-1.39)        | 1.17 (0.83-1.67)        | 1.16 (0.83-1.66)        | 0.94 (0.80-1.11)          | 0.99 (0.65-1.51)        | 0.99 (0.66-1.51)        |
| LFIC  | XO    | 1.01 (0.84-1.20)        | 1.09 (0.80-1.56)        | 1.09 (0.81-1.56)        | 0.97 (0.81-1.17)          | 1.05 (0.71-1.60)        | 1.05 (0.71-1.59)        |
| LFIC  | XOB   | 1.10 (0.88-1.38)        | 1.12 (0.79-1.62)        | 1.12 (0.79-1.62)        | 0.91 (0.76-1.09)          | 0.98 (0.65-1.50)        | 0.98 (0.65-1.50)        |
| LFIC  | XOBC  | 0.96 (0.71-1.29)        | 0.98 (0.60-1.63)        | 0.97 (0.60-1.62)        | <b>0.75 (0.59-0.94)</b>   | 0.80 (0.44-1.49)        | 0.80 (0.44-1.49)        |
| LFIC  | X     | 0.67 (0.40-1.14)        | 0.73 (0.38-1.43)        | 0.73 (0.38-1.43)        | 1.30 (0.71-2.38)          | 1.41 (0.62-3.23)        | 1.40 (0.62-3.21)        |
| LFIP  | LFIBP | 0.74 (0.55-1.01)        | 0.73 (0.48-1.10)        | 0.73 (0.48-1.10)        | <b>0.66 (0.46-0.95)</b>   | 0.69 (0.41-1.17)        | 0.69 (0.41-1.17)        |
| LFIP  | LFO   | 0.86 (0.73-1.01)        | 0.87 (0.68-1.15)        | 0.87 (0.68-1.15)        | <b>0.82 (0.70-0.97)</b>   | 0.85 (0.60-1.20)        | 0.85 (0.61-1.20)        |
| LFIP  | LFOB  | 1.04 (0.83-1.30)        | 1.03 (0.74-1.43)        | 1.03 (0.74-1.43)        | 0.85 (0.70-1.03)          | 0.86 (0.59-1.27)        | 0.87 (0.60-1.27)        |
| LFIP  | LFOC  | <b>0.72 (0.58-0.90)</b> | 0.72 (0.52-1.01)        | 0.72 (0.52-1.01)        | <b>0.70 (0.58-0.86)</b>   | 0.74 (0.51-1.09)        | 0.74 (0.51-1.09)        |
| LFIP  | LFOP  | 0.83 (0.68-1.01)        | 0.84 (0.62-1.13)        | 0.84 (0.62-1.13)        | <b>0.80 (0.66-0.96)</b>   | 0.83 (0.58-1.20)        | 0.83 (0.58-1.20)        |
| LFIP  | LFOI  | 1.23 (0.97-1.55)        | 1.23 (0.87-1.77)        | 1.23 (0.87-1.76)        | <b>1.45 (1.16-1.81)</b>   | 1.51 (0.97-2.38)        | 1.51 (0.97-2.38)        |
| LFIP  | LFOIB | 1.23 (0.93-1.61)        | 1.08 (0.66-1.61)        | 1.08 (0.66-1.61)        | 0.88 (0.71-1.10)          | 0.78 (0.50-1.20)        | 0.78 (0.50-1.20)        |
| LFIP  | LFOIP | -                       | -                       | -                       | 1.63 (0.97-2.72)          | 1.70 (0.78-3.69)        | 1.70 (0.78-3.66)        |
| LFIP  | LF    | 1.03 (0.78-1.37)        | 1.04 (0.68-1.63)        | 1.05 (0.68-1.62)        | 0.99 (0.76-1.30)          | 1.04 (0.59-1.83)        | 1.04 (0.60-1.84)        |
| LFIP  | LFC   | 0.98 (0.67-1.41)        | 0.98 (0.56-1.78)        | 0.99 (0.56-1.76)        | 1.12 (0.79-1.58)          | 1.16 (0.56-2.44)        | 1.17 (0.57-2.46)        |
| LFIP  | LFP   | 0.59 (0.28-1.23)        | 0.59 (0.26-1.34)        | 0.59 (0.26-1.34)        | 0.86 (0.53-1.38)          | 0.89 (0.44-1.82)        | 0.89 (0.44-1.82)        |
| LFIP  | IO    | 0.97 (0.81-1.15)        | 0.98 (0.72-1.35)        | 0.98 (0.72-1.35)        | 1.12 (0.94-1.33)          | 1.16 (0.78-1.76)        | 1.17 (0.78-1.76)        |
| LFIP  | IOB   | 1.35 (0.87-2.09)        | 1.34 (0.75-2.38)        | 1.33 (0.75-2.37)        | 0.93 (0.63-1.39)          | 0.95 (0.49-1.86)        | 0.95 (0.49-1.86)        |
| LFIP  | XB    | <b>0.46 (0.25-0.86)</b> | 0.47 (0.21-1.02)        | 0.47 (0.21-1.04)        | 0.61 (0.32-1.19)          | 0.63 (0.24-1.68)        | 0.63 (0.24-1.66)        |
| LFIP  | XIB   | 0.99 (0.79-1.24)        | 0.95 (0.66-1.34)        | 0.95 (0.66-1.34)        | 0.84 (0.69-1.02)          | 0.84 (0.55-1.30)        | 0.84 (0.55-1.30)        |
| LFIP  | XO    | 0.88 (0.73-1.06)        | 0.89 (0.64-1.24)        | 0.89 (0.65-1.24)        | 0.87 (0.72-1.05)          | 0.90 (0.60-1.36)        | 0.90 (0.60-1.36)        |
| LFIP  | XOB   | 0.96 (0.75-1.23)        | 0.91 (0.63-1.30)        | 0.91 (0.63-1.30)        | 0.81 (0.66-1.00)          | 0.83 (0.54-1.29)        | 0.83 (0.54-1.29)        |
| LFIP  | XOBC  | 0.83 (0.61-1.14)        | 0.80 (0.47-1.30)        | 0.79 (0.47-1.30)        | <b>0.67 (0.52-0.86)</b>   | 0.68 (0.37-1.28)        | 0.68 (0.37-1.28)        |
| LFIP  | X     | 0.59 (0.35-1.00)        | 0.59 (0.31-1.15)        | 0.60 (0.31-1.15)        | 1.16 (0.63-2.14)          | 1.19 (0.52-2.75)        | 1.19 (0.52-2.74)        |
| LFIBP | LFO   | 1.15 (0.85-1.56)        | 1.20 (0.81-1.82)        | 1.20 (0.81-1.82)        | 1.24 (0.86-1.77)          | 1.23 (0.73-2.08)        | 1.23 (0.74-2.09)        |
| LFIBP | LFOB  | 1.40 (0.99-1.99)        | 1.42 (0.89-2.27)        | 1.41 (0.89-2.28)        | 1.28 (0.87-1.86)          | 1.26 (0.72-2.22)        | 1.26 (0.72-2.23)        |
| LFIBP | LFOC  | 0.98 (0.70-1.37)        | 0.99 (0.63-1.58)        | 0.99 (0.63-1.57)        | 1.06 (0.73-1.54)          | 1.08 (0.62-1.88)        | 1.08 (0.62-1.88)        |
| LFIBP | LFOP  | 1.12 (0.81-1.55)        | 1.15 (0.74-1.81)        | 1.15 (0.75-1.81)        | 1.20 (0.83-1.74)          | 1.21 (0.69-2.13)        | 1.21 (0.69-2.13)        |
| LFIBP | LFOI  | <b>1.65 (1.17-2.33)</b> | <b>1.70 (1.09-2.72)</b> | <b>1.69 (1.08-2.70)</b> | <b>2.19 (1.49-3.21)</b>   | <b>2.20 (1.24-3.92)</b> | <b>2.20 (1.24-3.92)</b> |

| T1    | T2    | Overall survival        |                  |                         | Progression-free survival |                         |                         |
|-------|-------|-------------------------|------------------|-------------------------|---------------------------|-------------------------|-------------------------|
|       |       | Fixed effects           | Random effects   | Meta-regression         | Fixed effects             | Random effects          | Meta-regression         |
| LFIBP | LFOIB | <b>1.65 (1.13-2.42)</b> | 1.48 (0.82-2.51) | 1.48 (0.82-2.49)        | 1.33 (0.90-1.97)          | 1.14 (0.62-2.08)        | 1.14 (0.62-2.08)        |
| LFIBP | LFOIP | -                       | -                | -                       | <b>2.45 (1.34-4.48)</b>   | <b>2.47 (1.06-5.83)</b> | <b>2.47 (1.06-5.76)</b> |
| LFIBP | LF    | 1.39 (0.96-2.03)        | 1.44 (0.87-2.45) | 1.43 (0.86-2.46)        | 1.49 (0.99-2.26)          | 1.51 (0.78-2.94)        | 1.52 (0.78-2.98)        |
| LFIBP | LFC   | 1.31 (0.84-2.06)        | 1.36 (0.72-2.63) | 1.35 (0.72-2.61)        | <b>1.68 (1.05-2.68)</b>   | 1.70 (0.75-3.86)        | 1.70 (0.75-3.88)        |
| LFIBP | LFP   | 0.79 (0.36-1.74)        | 0.82 (0.34-1.98) | 0.81 (0.33-1.97)        | 1.29 (0.73-2.29)          | 1.30 (0.57-3.00)        | 1.31 (0.57-3.00)        |
| LFIBP | IO    | 1.30 (0.96-1.77)        | 1.35 (0.89-2.08) | 1.34 (0.89-2.09)        | 1.68 (1.18-2.41)          | 1.70 (0.98-2.95)        | 1.70 (0.98-2.96)        |
| LFIBP | IOB   | <b>1.82 (1.09-3.03)</b> | 1.84 (0.95-3.61) | 1.83 (0.95-3.59)        | 1.41 (0.84-2.35)          | 1.39 (0.63-3.05)        | 1.39 (0.64-3.05)        |
| LFIBP | XB    | 0.63 (0.32-1.22)        | 0.64 (0.28-1.51) | 0.65 (0.28-1.50)        | 0.93 (0.44-1.94)          | 0.92 (0.33-2.62)        | 0.92 (0.32-2.63)        |
| LFIBP | XIB   | 1.33 (0.94-1.89)        | 1.31 (0.80-2.13) | 1.30 (0.80-2.12)        | 1.26 (0.86-1.84)          | 1.23 (0.67-2.24)        | 1.23 (0.67-2.26)        |
| LFIBP | XO    | 1.18 (0.86-1.62)        | 1.22 (0.79-1.93) | 1.22 (0.79-1.93)        | 1.31 (0.90-1.89)          | 1.31 (0.74-2.32)        | 1.31 (0.74-2.32)        |
| LFIBP | XOB   | 1.29 (0.90-1.86)        | 1.26 (0.76-2.05) | 1.25 (0.76-2.05)        | 1.22 (0.83-1.80)          | 1.21 (0.66-2.22)        | 1.21 (0.66-2.23)        |
| LFIBP | XOBC  | 1.12 (0.75-1.69)        | 1.10 (0.59-1.99) | 1.09 (0.59-1.99)        | 1.00 (0.67-1.51)          | 0.99 (0.47-2.11)        | 1.00 (0.47-2.11)        |
| LFIBP | X     | 0.79 (0.44-1.42)        | 0.82 (0.40-1.70) | 0.82 (0.40-1.69)        | 1.75 (0.87-3.47)          | 1.74 (0.70-4.35)        | 1.73 (0.69-4.38)        |
| LFO   | LFOB  | 1.21 (0.98-1.51)        | 1.18 (0.85-1.61) | 1.18 (0.85-1.60)        | 1.03 (0.86-1.24)          | 1.02 (0.72-1.44)        | 1.02 (0.73-1.44)        |
| LFO   | LFOC  | 0.85 (0.71-1.01)        | 0.83 (0.63-1.07) | 0.83 (0.63-1.07)        | <b>0.86 (0.75-0.98)</b>   | 0.87 (0.68-1.13)        | 0.87 (0.68-1.13)        |
| LFO   | LFOF  | 0.97 (0.85-1.11)        | 0.96 (0.77-1.19) | 0.96 (0.77-1.19)        | 0.97 (0.86-1.10)          | 0.98 (0.74-1.30)        | 0.98 (0.74-1.30)        |
| LFO   | LFOI  | <b>1.43 (1.14-1.81)</b> | 1.42 (1.00-1.98) | <b>1.41 (1.01-1.98)</b> | <b>1.77 (1.41-2.22)</b>   | <b>1.78 (1.15-2.78)</b> | <b>1.78 (1.15-2.77)</b> |
| LFO   | LFOIB | <b>1.43 (1.09-1.89)</b> | 1.24 (0.74-1.85) | 1.24 (0.74-1.85)        | 1.08 (0.87-1.33)          | 0.92 (0.60-1.38)        | 0.92 (0.60-1.38)        |
| LFO   | LFOIP | -                       | -                | -                       | <b>1.98 (1.19-3.33)</b>   | 2.00 (0.92-4.34)        | 2.00 (0.93-4.30)        |
| LFO   | LF    | 1.21 (0.92-1.60)        | 1.20 (0.78-1.83) | 1.20 (0.78-1.83)        | 1.21 (0.92-1.59)          | 1.23 (0.70-2.13)        | 1.23 (0.71-2.14)        |
| LFO   | LFC   | 1.14 (0.79-1.65)        | 1.13 (0.64-2.00) | 1.13 (0.64-1.99)        | 1.36 (0.96-1.92)          | 1.38 (0.66-2.85)        | 1.38 (0.67-2.86)        |
| LFO   | LFP   | 0.69 (0.33-1.42)        | 0.68 (0.31-1.49) | 0.68 (0.30-1.49)        | 1.04 (0.67-1.64)          | 1.06 (0.55-2.06)        | 1.06 (0.54-2.06)        |
| LFO   | IO    | 1.13 (0.97-1.32)        | 1.12 (0.86-1.46) | 1.12 (0.86-1.46)        | <b>1.36 (1.17-1.58)</b>   | 1.38 (0.96-1.96)        | 1.37 (0.96-1.96)        |
| LFO   | IOB   | <b>1.58 (1.02-2.43)</b> | 1.53 (0.86-2.70) | 1.53 (0.86-2.67)        | 1.14 (0.77-1.68)          | 1.13 (0.59-2.15)        | 1.12 (0.59-2.13)        |
| LFO   | XB    | <b>0.54 (0.30-0.99)</b> | 0.54 (0.26-1.12) | 0.54 (0.26-1.13)        | 0.75 (0.39-1.42)          | 0.75 (0.30-1.85)        | 0.74 (0.30-1.84)        |
| LFO   | XIB   | 1.16 (0.93-1.45)        | 1.09 (0.75-1.53) | 1.09 (0.75-1.52)        | 1.02 (0.85-1.23)          | 0.99 (0.65-1.51)        | 0.99 (0.65-1.50)        |
| LFO   | XO    | 1.02 (0.93-1.12)        | 1.02 (0.83-1.24) | 1.02 (0.83-1.24)        | 1.06 (0.97-1.16)          | 1.06 (0.84-1.33)        | 1.06 (0.84-1.34)        |
| LFO   | XOB   | 1.12 (0.88-1.43)        | 1.05 (0.72-1.48) | 1.04 (0.72-1.47)        | 0.99 (0.82-1.20)          | 0.98 (0.65-1.48)        | 0.98 (0.65-1.47)        |
| LFO   | XOBC  | 0.98 (0.72-1.33)        | 0.91 (0.54-1.47) | 0.91 (0.54-1.47)        | 0.81 (0.64-1.04)          | 0.80 (0.44-1.48)        | 0.81 (0.44-1.47)        |
| LFO   | X     | 0.69 (0.42-1.14)        | 0.68 (0.37-1.24) | 0.68 (0.37-1.24)        | 1.41 (0.78-2.54)          | 1.41 (0.66-3.00)        | 1.40 (0.66-2.99)        |
| LFOB  | LFOC  | <b>0.70 (0.54-0.90)</b> | 0.70 (0.48-1.02) | 0.70 (0.48-1.02)        | 0.83 (0.68-1.01)          | 0.86 (0.60-1.22)        | 0.86 (0.60-1.22)        |
| LFOB  | LFOF  | 0.80 (0.64-1.00)        | 0.82 (0.59-1.12) | 0.82 (0.60-1.12)        | 0.94 (0.78-1.14)          | 0.96 (0.68-1.37)        | 0.96 (0.68-1.37)        |
| LFOB  | LFOI  | 1.18 (0.89-1.58)        | 1.20 (0.79-1.84) | 1.20 (0.79-1.83)        | <b>1.71 (1.33-2.21)</b>   | <b>1.75 (1.07-2.86)</b> | <b>1.75 (1.07-2.85)</b> |
| LFOB  | LFOIB | 1.18 (0.93-1.50)        | 1.05 (0.67-1.50) | 1.05 (0.67-1.49)        | 1.04 (0.91-1.20)          | 0.90 (0.68-1.18)        | 0.91 (0.68-1.18)        |
| LFOB  | LFOIP | -                       | -                | -                       | <b>1.92 (1.13-3.26)</b>   | 1.96 (0.88-4.38)        | 1.96 (0.88-4.33)        |
| LFOB  | LF    | 0.99 (0.72-1.38)        | 1.02 (0.63-1.67) | 1.02 (0.63-1.67)        | 1.17 (0.87-1.57)          | 1.20 (0.66-2.18)        | 1.20 (0.66-2.19)        |
| LFOB  | LFC   | 0.94 (0.62-1.41)        | 0.96 (0.52-1.80) | 0.96 (0.52-1.79)        | 1.31 (0.91-1.90)          | 1.35 (0.63-2.89)        | 1.35 (0.64-2.90)        |
| LFOB  | LFP   | 0.57 (0.27-1.20)        | 0.58 (0.25-1.31) | 0.58 (0.25-1.32)        | 1.01 (0.63-1.62)          | 1.04 (0.51-2.08)        | 1.03 (0.51-2.09)        |
| LFOB  | IO    | 0.93 (0.73-1.18)        | 0.95 (0.66-1.39) | 0.95 (0.66-1.40)        | <b>1.32 (1.07-1.62)</b>   | 1.35 (0.87-2.09)        | 1.35 (0.87-2.09)        |
| LFOB  | IOB   | 1.30 (0.89-1.89)        | 1.30 (0.81-2.08) | 1.30 (0.81-2.07)        | 1.10 (0.78-1.56)          | 1.10 (0.64-1.90)        | 1.10 (0.64-1.91)        |
| LFOB  | XB    | <b>0.45 (0.24-0.84)</b> | 0.46 (0.20-1.02) | 0.46 (0.20-1.02)        | 0.72 (0.37-1.41)          | 0.73 (0.28-1.93)        | 0.73 (0.28-1.92)        |
| LFOB  | XIB   | 0.95 (0.81-1.13)        | 0.92 (0.70-1.19) | 0.92 (0.70-1.19)        | 0.99 (0.88-1.11)          | 0.97 (0.71-1.33)        | 0.97 (0.71-1.33)        |
| LFOB  | XO    | 0.84 (0.67-1.07)        | 0.86 (0.60-1.26) | 0.86 (0.60-1.26)        | 1.02 (0.83-1.25)          | 1.04 (0.69-1.57)        | 1.04 (0.69-1.57)        |
| LFOB  | XOB   | 0.92 (0.82-1.05)        | 0.89 (0.71-1.08) | 0.89 (0.71-1.08)        | 0.96 (0.87-1.06)          | 0.96 (0.74-1.24)        | 0.96 (0.74-1.24)        |
| LFOB  | XOBC  | 0.80 (0.64-1.01)        | 0.77 (0.51-1.14) | 0.77 (0.51-1.14)        | 0.79 (0.66-0.94)          | 0.79 (0.47-1.32)        | 0.79 (0.47-1.32)        |

| T1    | T2    | Overall survival        |                         |                         | Progression-free survival |                         |                         |
|-------|-------|-------------------------|-------------------------|-------------------------|---------------------------|-------------------------|-------------------------|
|       |       | Fixed effects           | Random effects          | Meta-regression         | Fixed effects             | Random effects          | Meta-regression         |
| LFOB  | X     | <b>0.56 (0.33-0.98)</b> | 0.58 (0.29-1.14)        | 0.58 (0.29-1.14)        | 1.37 (0.74-2.53)          | 1.38 (0.60-3.18)        | 1.37 (0.61-3.15)        |
| LFOC  | LFOP  | 1.15 (0.93-1.42)        | 1.16 (0.84-1.62)        | 1.16 (0.84-1.61)        | 1.13 (0.95-1.35)          | 1.12 (0.79-1.59)        | 1.12 (0.79-1.59)        |
| LFOC  | LFOI  | <b>1.69 (1.29-2.23)</b> | <b>1.71 (1.15-2.57)</b> | <b>1.71 (1.15-2.56)</b> | <b>2.06 (1.61-2.65)</b>   | <b>2.04 (1.27-3.28)</b> | <b>2.04 (1.27-3.28)</b> |
| LFOC  | LFOIB | <b>1.69 (1.24-2.30)</b> | 1.49 (0.88-2.31)        | 1.49 (0.88-2.31)        | 1.26 (1.00-1.58)          | 1.06 (0.68-1.60)        | 1.06 (0.68-1.59)        |
| LFOC  | LFOIP | -                       | -                       | -                       | <b>2.31 (1.36-3.91)</b>   | <b>2.29 (1.04-5.08)</b> | <b>2.28 (1.04-5.02)</b> |
| LFOC  | LF    | <b>1.43 (1.04-1.95)</b> | 1.45 (0.91-2.35)        | 1.45 (0.91-2.34)        | <b>1.41 (1.05-1.89)</b>   | 1.40 (0.78-2.51)        | 1.41 (0.79-2.52)        |
| LFOC  | LFC   | 1.35 (0.90-2.01)        | 1.37 (0.75-2.54)        | 1.36 (0.75-2.52)        | <b>1.58 (1.10-2.28)</b>   | 1.57 (0.74-3.34)        | 1.58 (0.75-3.34)        |
| LFOC  | LFP   | 0.81 (0.39-1.71)        | 0.82 (0.36-1.87)        | 0.82 (0.35-1.89)        | 1.22 (0.76-1.95)          | 1.21 (0.60-2.43)        | 1.21 (0.60-2.43)        |
| LFOC  | IO    | <b>1.34 (1.08-1.66)</b> | 1.35 (0.96-1.94)        | 1.35 (0.96-1.94)        | <b>1.59 (1.31-1.92)</b>   | <b>1.57 (1.05-2.36)</b> | <b>1.57 (1.04-2.37)</b> |
| LFOC  | IOB   | <b>1.86 (1.18-2.94)</b> | <b>1.85 (1.02-3.38)</b> | <b>1.84 (1.02-3.36)</b> | 1.33 (0.89-1.98)          | 1.29 (0.67-2.46)        | 1.28 (0.67-2.45)        |
| LFOC  | XB    | 0.64 (0.34-1.19)        | 0.65 (0.30-1.41)        | 0.66 (0.30-1.43)        | 0.87 (0.45-1.68)          | 0.86 (0.34-2.19)        | 0.85 (0.33-2.19)        |
| LFOC  | XIB   | <b>1.37 (1.05-1.77)</b> | 1.32 (0.87-1.94)        | 1.31 (0.88-1.94)        | 1.19 (0.97-1.46)          | 1.14 (0.74-1.74)        | 1.14 (0.74-1.74)        |
| LFOC  | XO    | 1.21 (0.99-1.47)        | 1.23 (0.89-1.72)        | 1.23 (0.90-1.72)        | <b>1.23 (1.05-1.45)</b>   | 1.21 (0.86-1.71)        | 1.21 (0.86-1.71)        |
| LFOC  | XOB   | 1.33 (1.00-1.75)        | 1.26 (0.83-1.88)        | 1.26 (0.83-1.88)        | 1.16 (0.93-1.43)          | 1.12 (0.74-1.70)        | 1.12 (0.74-1.70)        |
| LFOC  | XOBC  | 1.15 (0.82-1.62)        | 1.10 (0.64-1.86)        | 1.09 (0.64-1.86)        | 0.95 (0.73-1.23)          | 0.92 (0.50-1.70)        | 0.92 (0.50-1.70)        |
| LFOC  | X     | 0.81 (0.48-1.38)        | 0.82 (0.43-1.59)        | 0.83 (0.43-1.60)        | 1.65 (0.90-3.01)          | 1.61 (0.73-3.59)        | 1.60 (0.73-3.57)        |
| LFOP  | LFOI  | <b>1.48 (1.14-1.92)</b> | 1.47 (1.00-2.17)        | 1.47 (1.00-2.16)        | <b>1.82 (1.42-2.33)</b>   | <b>1.82 (1.12-2.96)</b> | <b>1.82 (1.11-2.97)</b> |
| LFOP  | LFOIB | <b>1.48 (1.11-1.97)</b> | 1.29 (0.77-1.95)        | 1.29 (0.77-1.95)        | 1.11 (0.89-1.39)          | 0.94 (0.60-1.43)        | 0.94 (0.61-1.42)        |
| LFOP  | LFOIP | -                       | -                       | -                       | <b>2.04 (1.21-3.45)</b>   | 2.04 (0.91-4.55)        | 2.04 (0.92-4.51)        |
| LFOP  | LF    | 1.25 (0.92-1.68)        | 1.25 (0.79-1.98)        | 1.25 (0.79-1.99)        | 1.24 (0.93-1.66)          | 1.25 (0.69-2.25)        | 1.25 (0.69-2.26)        |
| LFOP  | LFC   | 1.18 (0.80-1.73)        | 1.18 (0.65-2.15)        | 1.18 (0.65-2.14)        | 1.40 (0.97-2.01)          | 1.40 (0.65-3.00)        | 1.41 (0.66-3.00)        |
| LFOP  | LFP   | 0.71 (0.35-1.45)        | 0.71 (0.33-1.50)        | 0.71 (0.32-1.51)        | 1.07 (0.70-1.66)          | 1.08 (0.59-1.97)        | 1.08 (0.59-1.97)        |
| LFOP  | IO    | 1.17 (0.96-1.42)        | 1.17 (0.84-1.63)        | 1.17 (0.84-1.62)        | 1.40 (1.16-1.68)          | 1.40 (0.92-2.14)        | 1.40 (0.92-2.13)        |
| LFOP  | IOB   | <b>1.63 (1.05-2.52)</b> | 1.60 (0.90-2.82)        | 1.59 (0.90-2.80)        | 1.17 (0.79-1.74)          | 1.15 (0.60-2.20)        | 1.14 (0.60-2.20)        |
| LFOP  | XB    | 0.56 (0.30-1.03)        | 0.56 (0.26-1.21)        | 0.57 (0.26-1.22)        | 0.77 (0.40-1.48)          | 0.76 (0.30-1.96)        | 0.75 (0.29-1.96)        |
| LFOP  | XIB   | 1.19 (0.94-1.51)        | 1.13 (0.77-1.62)        | 1.13 (0.78-1.61)        | 1.05 (0.86-1.28)          | 1.01 (0.65-1.56)        | 1.01 (0.65-1.55)        |
| LFOP  | XO    | 1.06 (0.90-1.24)        | 1.06 (0.79-1.43)        | 1.06 (0.79-1.43)        | 1.09 (0.93-1.27)          | 1.08 (0.75-1.55)        | 1.08 (0.75-1.55)        |
| LFOP  | XOB   | 1.16 (0.90-1.48)        | 1.09 (0.75-1.55)        | 1.09 (0.75-1.54)        | 1.02 (0.83-1.25)          | 1.00 (0.66-1.52)        | 1.00 (0.66-1.52)        |
| LFOP  | XOBC  | 1.01 (0.73-1.38)        | 0.95 (0.56-1.55)        | 0.95 (0.56-1.54)        | 0.84 (0.65-1.08)          | 0.82 (0.44-1.51)        | 0.82 (0.44-1.51)        |
| LFOP  | X     | 0.71 (0.42-1.19)        | 0.71 (0.37-1.35)        | 0.71 (0.37-1.34)        | 1.45 (0.80-2.65)          | 1.43 (0.65-3.22)        | 1.43 (0.64-3.20)        |
| LFOI  | LFOIB | 1.00 (0.72-1.39)        | 0.87 (0.49-1.40)        | 0.87 (0.50-1.39)        | <b>0.61 (0.46-0.80)</b>   | <b>0.52 (0.30-0.88)</b> | <b>0.52 (0.30-0.88)</b> |
| LFOI  | LFOIP | -                       | -                       | -                       | 1.12 (0.70-1.78)          | 1.12 (0.60-2.11)        | 1.12 (0.60-2.10)        |
| LFOI  | LF    | 0.84 (0.61-1.16)        | 0.85 (0.53-1.38)        | 0.85 (0.53-1.37)        | <b>0.68 (0.50-0.93)</b>   | 0.69 (0.37-1.25)        | 0.69 (0.38-1.26)        |
| LFOI  | LFC   | 0.80 (0.53-1.19)        | 0.80 (0.44-1.48)        | 0.80 (0.44-1.47)        | 0.77 (0.53-1.12)          | 0.77 (0.36-1.65)        | 0.77 (0.36-1.67)        |
| LFOI  | LFP   | 0.48 (0.22-1.03)        | 0.48 (0.20-1.13)        | 0.48 (0.20-1.13)        | <b>0.59 (0.36-0.97)</b>   | 0.59 (0.27-1.28)        | 0.59 (0.27-1.29)        |
| LFOI  | IO    | 0.79 (0.62-1.00)        | 0.79 (0.55-1.15)        | 0.79 (0.55-1.15)        | <b>0.77 (0.61-0.96)</b>   | 0.77 (0.48-1.23)        | 0.77 (0.48-1.24)        |
| LFOI  | IOB   | 1.10 (0.69-1.76)        | 1.08 (0.58-2.03)        | 1.08 (0.58-2.02)        | <b>0.64 (0.42-0.99)</b>   | 0.63 (0.30-1.32)        | 0.63 (0.30-1.31)        |
| LFOI  | XB    | <b>0.38 (0.20-0.72)</b> | <b>0.38 (0.17-0.85)</b> | <b>0.39 (0.17-0.86)</b> | <b>0.42 (0.21-0.83)</b>   | 0.42 (0.15-1.15)        | 0.42 (0.15-1.14)        |
| LFOI  | XIB   | 0.81 (0.60-1.08)        | 0.77 (0.49-1.18)        | 0.77 (0.49-1.17)        | <b>0.58 (0.45-0.74)</b>   | <b>0.56 (0.33-0.95)</b> | <b>0.56 (0.33-0.95)</b> |
| LFOI  | XO    | <b>0.71 (0.56-0.92)</b> | 0.72 (0.49-1.07)        | 0.72 (0.49-1.07)        | <b>0.60 (0.47-0.76)</b>   | <b>0.59 (0.36-0.97)</b> | <b>0.59 (0.36-0.98)</b> |
| LFOI  | XOB   | 0.78 (0.58-1.06)        | 0.74 (0.46-1.14)        | 0.74 (0.47-1.14)        | <b>0.56 (0.43-0.73)</b>   | <b>0.55 (0.32-0.94)</b> | <b>0.55 (0.32-0.94)</b> |
| LFOI  | XOBC  | <b>0.68 (0.47-0.98)</b> | 0.65 (0.36-1.12)        | 0.64 (0.36-1.12)        | <b>0.46 (0.34-0.62)</b>   | <b>0.45 (0.22-0.90)</b> | <b>0.45 (0.22-0.91)</b> |
| LFOI  | X     | <b>0.48 (0.28-0.83)</b> | <b>0.48 (0.24-0.96)</b> | <b>0.48 (0.24-0.96)</b> | 0.80 (0.42-1.50)          | 0.79 (0.33-1.89)        | 0.79 (0.33-1.88)        |
| LFOIB | LFOIP | -                       | -                       | -                       | <b>1.84 (1.07-3.16)</b>   | 2.17 (0.95-5.03)        | 2.17 (0.96-4.98)        |
| LFOIB | LF    | 0.84 (0.59-1.21)        | 0.97 (0.57-1.83)        | 0.97 (0.57-1.83)        | 1.12 (0.82-1.54)          | 1.33 (0.71-2.54)        | 1.33 (0.72-2.56)        |

| T1    | T2   | Overall survival        |                  |                  | Progression-free survival |                  |                  |
|-------|------|-------------------------|------------------|------------------|---------------------------|------------------|------------------|
|       |      | Fixed effects           | Random effects   | Meta-regression  | Fixed effects             | Random effects   | Meta-regression  |
| LFOIB | LFC  | 0.80 (0.51-1.24)        | 0.91 (0.48-1.93) | 0.91 (0.48-1.93) | 1.26 (0.86-1.85)          | 1.49 (0.68-3.34) | 1.49 (0.69-3.36) |
| LFOIB | LFP  | 0.48 (0.22-1.04)        | 0.55 (0.23-1.38) | 0.55 (0.23-1.38) | 0.97 (0.60-1.58)          | 1.15 (0.55-2.43) | 1.14 (0.55-2.43) |
| LFOIB | IO   | 0.79 (0.59-1.05)        | 0.91 (0.59-1.57) | 0.91 (0.59-1.56) | 1.26 (1.00-1.59)          | 1.49 (0.92-2.47) | 1.49 (0.92-2.49) |
| LFOIB | IOB  | 1.10 (0.71-1.72)        | 1.24 (0.70-2.40) | 1.24 (0.69-2.39) | 1.06 (0.73-1.54)          | 1.22 (0.67-2.27) | 1.22 (0.67-2.28) |
| LFOIB | XB   | 0.38 (0.20-0.73)        | 0.44 (0.19-1.07) | 0.44 (0.19-1.08) | 0.70 (0.35-1.37)          | 0.81 (0.30-2.22) | 0.80 (0.30-2.20) |
| LFOIB | XIB  | 0.81 (0.64-1.02)        | 0.88 (0.61-1.38) | 0.88 (0.61-1.38) | 0.95 (0.81-1.11)          | 1.08 (0.74-1.60) | 1.08 (0.74-1.60) |
| LFOIB | XO   | <b>0.71 (0.54-0.96)</b> | 0.82 (0.53-1.42) | 0.82 (0.53-1.42) | 0.98 (0.78-1.24)          | 1.15 (0.72-1.87) | 1.15 (0.72-1.87) |
| LFOIB | XOB  | 0.78 (0.61-1.01)        | 0.85 (0.58-1.34) | 0.84 (0.58-1.34) | 0.92 (0.78-1.08)          | 1.06 (0.75-1.55) | 1.06 (0.75-1.55) |
| LFOIB | XOBC | <b>0.68 (0.49-0.94)</b> | 0.73 (0.44-1.33) | 0.73 (0.45-1.32) | <b>0.75 (0.61-0.94)</b>   | 0.87 (0.50-1.57) | 0.87 (0.50-1.57) |
| LFOIB | X    | <b>0.48 (0.27-0.85)</b> | 0.55 (0.27-1.21) | 0.56 (0.27-1.22) | 1.31 (0.70-2.45)          | 1.53 (0.65-3.66) | 1.52 (0.65-3.64) |
| LFOIP | LF   | -                       | -                | -                | 0.61 (0.35-1.07)          | 0.61 (0.25-1.46) | 0.61 (0.26-1.48) |
| LFOIP | LFC  | -                       | -                | -                | 0.69 (0.38-1.25)          | 0.69 (0.25-1.85) | 0.69 (0.26-1.87) |
| LFOIP | LFP  | -                       | -                | -                | 0.53 (0.27-1.04)          | 0.53 (0.19-1.44) | 0.53 (0.19-1.44) |
| LFOIP | IO   | -                       | -                | -                | 0.69 (0.41-1.15)          | 0.69 (0.31-1.51) | 0.69 (0.31-1.51) |
| LFOIP | IOB  | -                       | -                | -                | 0.57 (0.31-1.08)          | 0.56 (0.21-1.48) | 0.56 (0.21-1.47) |
| LFOIP | XB   | -                       | -                | -                | <b>0.38 (0.17-0.86)</b>   | 0.37 (0.11-1.23) | 0.37 (0.11-1.23) |
| LFOIP | XIB  | -                       | -                | -                | <b>0.51 (0.30-0.87)</b>   | 0.50 (0.22-1.14) | 0.50 (0.22-1.13) |
| LFOIP | XO   | -                       | -                | -                | <b>0.53 (0.32-0.90)</b>   | 0.53 (0.23-1.19) | 0.53 (0.24-1.18) |
| LFOIP | XOB  | -                       | -                | -                | <b>0.50 (0.29-0.85)</b>   | 0.49 (0.21-1.13) | 0.49 (0.22-1.12) |
| LFOIP | XOBC | -                       | -                | -                | <b>0.41 (0.24-0.71)</b>   | 0.40 (0.16-1.04) | 0.40 (0.16-1.03) |
| LFOIP | X    | -                       | -                | -                | 0.71 (0.33-1.56)          | 0.71 (0.24-2.08) | 0.70 (0.24-2.08) |
| LF    | LFC  | 0.94 (0.74-1.20)        | 0.94 (0.65-1.37) | 0.94 (0.65-1.37) | 1.12 (0.91-1.39)          | 1.12 (0.70-1.80) | 1.12 (0.70-1.81) |
| LF    | LFP  | 0.57 (0.26-1.23)        | 0.57 (0.23-1.37) | 0.57 (0.23-1.37) | 0.86 (0.51-1.45)          | 0.86 (0.37-2.02) | 0.86 (0.37-2.01) |
| LF    | IO   | 0.94 (0.71-1.24)        | 0.94 (0.60-1.46) | 0.94 (0.60-1.47) | 1.13 (0.86-1.48)          | 1.12 (0.63-2.01) | 1.12 (0.63-1.99) |
| LF    | IOB  | 1.31 (0.79-2.14)        | 1.28 (0.64-2.51) | 1.27 (0.64-2.49) | 0.94 (0.60-1.48)          | 0.92 (0.41-2.07) | 0.91 (0.41-2.05) |
| LF    | XB   | <b>0.45 (0.23-0.87)</b> | 0.45 (0.19-1.05) | 0.46 (0.19-1.05) | 0.62 (0.31-1.24)          | 0.61 (0.21-1.76) | 0.60 (0.21-1.75) |
| LF    | XIB  | 0.96 (0.69-1.32)        | 0.91 (0.54-1.49) | 0.91 (0.54-1.48) | 0.84 (0.63-1.13)          | 0.81 (0.43-1.53) | 0.81 (0.43-1.52) |
| LF    | XO   | 0.85 (0.63-1.14)        | 0.85 (0.53-1.36) | 0.85 (0.53-1.35) | 0.87 (0.66-1.16)          | 0.86 (0.47-1.58) | 0.86 (0.47-1.57) |
| LF    | XOB  | 0.93 (0.66-1.30)        | 0.87 (0.51-1.44) | 0.87 (0.51-1.43) | 0.82 (0.60-1.11)          | 0.80 (0.42-1.52) | 0.80 (0.42-1.50) |
| LF    | XOBC | 0.81 (0.55-1.19)        | 0.76 (0.40-1.39) | 0.76 (0.40-1.39) | 0.67 (0.48-0.94)          | 0.66 (0.30-1.43) | 0.65 (0.30-1.42) |
| LF    | X    | 0.57 (0.32-1.01)        | 0.57 (0.27-1.19) | 0.57 (0.27-1.19) | 1.17 (0.61-2.23)          | 1.15 (0.45-2.93) | 1.14 (0.45-2.91) |
| LFC   | LFP  | 0.60 (0.27-1.36)        | 0.60 (0.23-1.57) | 0.60 (0.23-1.57) | 0.77 (0.44-1.35)          | 0.77 (0.29-2.04) | 0.76 (0.29-2.02) |
| LFC   | IO   | 0.99 (0.68-1.44)        | 0.99 (0.55-1.79) | 0.99 (0.55-1.78) | 1.00 (0.71-1.42)          | 1.00 (0.47-2.13) | 0.99 (0.47-2.11) |
| LFC   | IOB  | 1.39 (0.79-2.40)        | 1.36 (0.62-2.94) | 1.35 (0.62-2.91) | 0.84 (0.51-1.39)          | 0.82 (0.32-2.10) | 0.81 (0.32-2.07) |
| LFC   | XB   | <b>0.48 (0.24-0.96)</b> | 0.47 (0.19-1.20) | 0.48 (0.19-1.21) | 0.55 (0.27-1.14)          | 0.54 (0.17-1.74) | 0.54 (0.17-1.71) |
| LFC   | XIB  | 1.02 (0.68-1.52)        | 0.96 (0.50-1.79) | 0.96 (0.50-1.77) | 0.75 (0.52-1.08)          | 0.72 (0.33-1.61) | 0.72 (0.32-1.58) |
| LFC   | XO   | 0.90 (0.61-1.32)        | 0.90 (0.49-1.64) | 0.90 (0.49-1.64) | 0.78 (0.54-1.11)          | 0.77 (0.36-1.66) | 0.77 (0.36-1.64) |
| LFC   | XOB  | 0.98 (0.65-1.50)        | 0.93 (0.48-1.73) | 0.92 (0.48-1.72) | 0.73 (0.50-1.06)          | 0.71 (0.32-1.58) | 0.71 (0.32-1.56) |
| LFC   | XOBC | 0.86 (0.54-1.35)        | 0.81 (0.38-1.64) | 0.80 (0.38-1.63) | 0.60 (0.40-0.89)          | 0.59 (0.23-1.46) | 0.58 (0.23-1.44) |
| LFC   | X    | 0.60 (0.32-1.12)        | 0.60 (0.26-1.38) | 0.61 (0.26-1.37) | 1.04 (0.52-2.06)          | 1.03 (0.36-2.92) | 1.02 (0.36-2.90) |
| LFP   | IO   | 1.64 (0.78-3.44)        | 1.65 (0.72-3.78) | 1.66 (0.72-3.86) | 1.30 (0.81-2.09)          | 1.30 (0.62-2.72) | 1.30 (0.62-2.72) |
| LFP   | IOB  | 2.30 (0.99-5.30)        | 2.26 (0.87-5.81) | 2.25 (0.87-5.90) | 1.09 (0.61-1.96)          | 1.06 (0.44-2.60) | 1.06 (0.44-2.59) |
| LFP   | XB   | 0.79 (0.31-2.02)        | 0.79 (0.27-2.37) | 0.80 (0.27-2.38) | 0.72 (0.33-1.57)          | 0.71 (0.23-2.17) | 0.70 (0.23-2.16) |
| LFP   | XIB  | 1.68 (0.79-3.57)        | 1.60 (0.68-3.72) | 1.60 (0.68-3.75) | 0.98 (0.61-1.57)          | 0.94 (0.45-1.98) | 0.94 (0.44-1.98) |
| LFP   | XO   | 1.49 (0.72-3.10)        | 1.50 (0.67-3.38) | 1.50 (0.67-3.45) | 1.01 (0.64-1.61)          | 1.00 (0.49-2.02) | 1.00 (0.49-2.04) |

| T1   | T2   | Overall survival        |                         |                         | Progression-free survival |                         |                         |
|------|------|-------------------------|-------------------------|-------------------------|---------------------------|-------------------------|-------------------------|
|      |      | Fixed effects           | Random effects          | Meta-regression         | Fixed effects             | Random effects          | Meta-regression         |
| LFP  | XOB  | 1.63 (0.76-3.48)        | 1.54 (0.66-3.56)        | 1.54 (0.66-3.61)        | 0.95 (0.59-1.53)          | 0.93 (0.44-1.95)        | 0.93 (0.44-1.94)        |
| LFP  | XOBC | 1.42 (0.65-3.09)        | 1.34 (0.53-3.31)        | 1.34 (0.53-3.36)        | 0.78 (0.47-1.28)          | 0.76 (0.32-1.81)        | 0.76 (0.32-1.80)        |
| LFP  | X    | 1.00 (0.41-2.41)        | 1.00 (0.37-2.76)        | 1.01 (0.37-2.78)        | 1.35 (0.64-2.83)          | 1.33 (0.49-3.64)        | 1.33 (0.49-3.64)        |
| IO   | IOB  | 1.40 (0.90-2.18)        | 1.37 (0.75-2.48)        | 1.36 (0.75-2.47)        | 0.84 (0.56-1.25)          | 0.82 (0.41-1.65)        | 0.82 (0.41-1.65)        |
| IO   | XB   | <b>0.48 (0.26-0.89)</b> | 0.48 (0.22-1.05)        | 0.49 (0.22-1.05)        | 0.55 (0.28-1.06)          | 0.54 (0.21-1.43)        | 0.54 (0.20-1.43)        |
| IO   | XIB  | 1.02 (0.81-1.30)        | 0.97 (0.64-1.43)        | 0.97 (0.64-1.42)        | <b>0.75 (0.61-0.92)</b>   | 0.72 (0.44-1.18)        | 0.72 (0.44-1.18)        |
| IO   | XO   | 0.91 (0.76-1.09)        | 0.91 (0.65-1.27)        | 0.91 (0.65-1.26)        | <b>0.78 (0.65-0.93)</b>   | 0.77 (0.50-1.18)        | 0.77 (0.50-1.18)        |
| IO   | XOB  | 0.99 (0.77-1.28)        | 0.93 (0.61-1.38)        | 0.93 (0.61-1.38)        | <b>0.73 (0.59-0.90)</b>   | 0.71 (0.44-1.16)        | 0.71 (0.44-1.17)        |
| IO   | XOBC | 0.86 (0.63-1.19)        | 0.81 (0.46-1.36)        | 0.81 (0.47-1.36)        | <b>0.60 (0.46-0.78)</b>   | 0.58 (0.30-1.14)        | 0.59 (0.30-1.14)        |
| IO   | X    | 0.61 (0.36-1.03)        | 0.61 (0.31-1.17)        | 0.61 (0.31-1.17)        | 1.04 (0.57-1.90)          | 1.03 (0.45-2.37)        | 1.02 (0.44-2.35)        |
| IOB  | XB   | <b>0.34 (0.17-0.72)</b> | <b>0.35 (0.14-0.89)</b> | <b>0.36 (0.14-0.90)</b> | 0.66 (0.31-1.39)          | 0.66 (0.22-2.02)        | 0.66 (0.22-2.02)        |
| IOB  | XIB  | 0.73 (0.49-1.11)        | 0.71 (0.41-1.21)        | 0.71 (0.41-1.21)        | 0.90 (0.62-1.29)          | 0.88 (0.47-1.66)        | 0.89 (0.47-1.66)        |
| IOB  | XO   | 0.65 (0.42-1.01)        | 0.66 (0.37-1.21)        | 0.67 (0.37-1.21)        | 0.93 (0.62-1.39)          | 0.94 (0.47-1.86)        | 0.94 (0.48-1.87)        |
| IOB  | XOB  | 0.71 (0.48-1.06)        | 0.68 (0.40-1.13)        | 0.68 (0.41-1.13)        | 0.87 (0.61-1.25)          | 0.87 (0.48-1.60)        | 0.87 (0.48-1.60)        |
| IOB  | XOBC | <b>0.62 (0.40-0.96)</b> | 0.59 (0.32-1.09)        | 0.60 (0.32-1.09)        | 0.71 (0.48-1.06)          | 0.71 (0.34-1.52)        | 0.72 (0.34-1.52)        |
| IOB  | X    | <b>0.43 (0.23-0.84)</b> | 0.45 (0.19-1.02)        | 0.45 (0.20-1.02)        | 1.24 (0.61-2.52)          | 1.25 (0.46-3.39)        | 1.25 (0.47-3.38)        |
| XB   | XIB  | <b>2.13 (1.13-4.01)</b> | 2.03 (0.89-4.54)        | 2.00 (0.88-4.55)        | 1.36 (0.70-2.67)          | 1.33 (0.49-3.61)        | 1.34 (0.50-3.59)        |
| XB   | XO   | <b>1.89 (1.04-3.40)</b> | 1.90 (0.93-3.86)        | 1.87 (0.93-3.88)        | 1.41 (0.75-2.68)          | 1.42 (0.59-3.38)        | 1.43 (0.59-3.41)        |
| XB   | XOB  | <b>2.07 (1.09-3.91)</b> | 1.95 (0.85-4.37)        | 1.92 (0.84-4.38)        | 1.32 (0.68-2.60)          | 1.31 (0.49-3.54)        | 1.33 (0.49-3.54)        |
| XB   | XOBC | 1.80 (0.92-3.51)        | 1.70 (0.69-4.10)        | 1.67 (0.69-4.06)        | 1.08 (0.55-2.16)          | 1.08 (0.36-3.21)        | 1.09 (0.36-3.19)        |
| XB   | X    | 1.27 (0.92-1.75)        | 1.27 (0.82-1.95)        | 1.26 (0.82-1.95)        | <b>1.89 (1.45-2.45)</b>   | <b>1.89 (1.15-3.09)</b> | <b>1.89 (1.15-3.12)</b> |
| XIB  | XO   | 0.89 (0.70-1.13)        | 0.93 (0.63-1.43)        | 0.94 (0.64-1.42)        | 1.04 (0.84-1.28)          | 1.06 (0.66-1.72)        | 1.07 (0.66-1.71)        |
| XIB  | XOB  | 0.97 (0.81-1.16)        | 0.96 (0.74-1.25)        | 0.96 (0.74-1.24)        | 0.97 (0.87-1.08)          | 0.99 (0.74-1.32)        | 0.99 (0.74-1.32)        |
| XIB  | XOBC | 0.84 (0.65-1.10)        | 0.84 (0.54-1.30)        | 0.84 (0.54-1.29)        | <b>0.80 (0.66-0.96)</b>   | 0.81 (0.47-1.38)        | 0.81 (0.47-1.39)        |
| XIB  | X    | 0.59 (0.35-1.03)        | 0.63 (0.31-1.27)        | 0.63 (0.31-1.27)        | 1.39 (0.75-2.57)          | 1.42 (0.60-3.37)        | 1.41 (0.60-3.35)        |
| XO   | XOB  | 1.10 (0.85-1.41)        | 1.03 (0.67-1.52)        | 1.03 (0.67-1.52)        | 0.94 (0.76-1.16)          | 0.93 (0.58-1.48)        | 0.93 (0.58-1.48)        |
| XO   | XOBC | 0.95 (0.69-1.31)        | 0.90 (0.51-1.51)        | 0.89 (0.51-1.50)        | 0.77 (0.59-1.00)          | 0.76 (0.40-1.46)        | 0.76 (0.40-1.45)        |
| XO   | X    | 0.67 (0.41-1.10)        | 0.67 (0.38-1.19)        | 0.67 (0.38-1.18)        | 1.34 (0.75-2.38)          | 1.33 (0.65-2.73)        | 1.33 (0.65-2.72)        |
| XOB  | XOBC | 0.87 (0.72-1.06)        | 0.87 (0.61-1.24)        | 0.87 (0.61-1.23)        | <b>0.82 (0.71-0.95)</b>   | 0.82 (0.52-1.28)        | 0.82 (0.52-1.29)        |
| XOB  | X    | 0.61 (0.35-1.07)        | 0.65 (0.33-1.32)        | 0.66 (0.33-1.32)        | 1.43 (0.76-2.65)          | 1.44 (0.61-3.39)        | 1.43 (0.61-3.38)        |
| XOBC | X    | 0.70 (0.39-1.27)        | 0.75 (0.34-1.65)        | 0.76 (0.35-1.64)        | 1.74 (0.92-3.28)          | 1.75 (0.66-4.64)        | 1.74 (0.67-4.59)        |
| LFI  | LFIC | 0.94 (0.74-1.20)        | 0.94 (0.65-1.37)        | 0.94 (0.65-1.37)        | <b>0.69 (0.59-0.80)</b>   | <b>0.64 (0.47-0.87)</b> | <b>0.64 (0.47-0.87)</b> |

X, capecitabine; B, bevacizumab; C, cetuximab; F, 5-fluorouracil; I, irinotecan; L, leucovorin; O, oxaliplatin; P, panitumumab. Bold fonts indicate significant difference.

**Supplementary Table S6.** Odds ratios and 95% credible intervals for pairwise estimates of adverse events grade  $\geq 3$  and serious adverse events.

| T1   | T2    | Adverse events grade $\geq 3$ |                         |                         | Serious adverse events  |                         |                         |
|------|-------|-------------------------------|-------------------------|-------------------------|-------------------------|-------------------------|-------------------------|
|      |       | Fixed effects                 | Random effects          | Meta-regression         | Fixed effects           | Random effects          | Meta-regression         |
| LFI  | LFIB  | <b>0.77 (0.61-0.98)</b>       | 0.68 (0.28-1.69)        | 0.71 (0.22-2.30)        | 0.80 (0.62-1.02)        | 0.79 (0.50-1.23)        | 0.72 (0.37-1.23)        |
| LFI  | LFIC  | <b>1.79 (1.45-2.22)</b>       | 1.50 (0.50-4.48)        | 1.52 (0.46-5.03)        | 1.05 (0.46-2.45)        | 1.03 (0.34-2.91)        | 0.88 (0.23-2.86)        |
| LFI  | LFIP  | <b>2.12 (1.68-2.67)</b>       | 2.04 (0.78-5.35)        | 2.18 (0.50-9.40)        | <b>1.50 (1.20-1.87)</b> | 1.46 (0.88-2.14)        | 1.06 (0.42-2.33)        |
| LFI  | LFIBP | 0.80 (0.52-1.22)              | 2.14 (0.73-7.20)        | 2.34 (0.41-15.3)        | -                       | -                       | -                       |
| LFI  | LFO   | 1.13 (0.87-1.47)              | 1.18 (0.52-2.69)        | 1.19 (0.47-3.03)        | <b>0.54 (0.33-0.88)</b> | <b>0.53 (0.27-0.97)</b> | <b>0.45 (0.19-0.92)</b> |
| LFI  | LFOB  | 1.69 (0.42-6.44)              | 1.60 (0.09-28.1)        | 1.81 (0.08-39.2)        | 0.67 (0.44-1.01)        | 0.67 (0.35-1.25)        | 0.60 (0.26-1.26)        |
| LFI  | LFOC  | <b>1.87 (1.26-2.77)</b>       | 1.72 (0.47-6.22)        | 1.74 (0.43-6.87)        | 0.96 (0.47-2.00)        | 0.93 (0.35-2.33)        | 0.80 (0.24-2.25)        |
| LFI  | LFOP  | <b>3.45 (1.09-11.4)</b>       | 3.33 (0.36-30.7)        | 3.66 (0.29-44.9)        | 0.88 (0.55-1.40)        | 0.89 (0.48-1.65)        | 0.76 (0.32-1.65)        |
| LFI  | LFOIB | 3.51 (0.83-14.3)              | 3.99 (0.17-96.5)        | 4.55 (0.15-137)         | 0.58 (0.32-1.07)        | 0.58 (0.25-1.35)        | 0.52 (0.18-1.34)        |
| LFI  | LF    | <b>0.47 (0.34-0.66)</b>       | 0.45 (0.16-1.29)        | 0.46 (0.15-1.38)        | -                       | -                       | -                       |
| LFI  | LFB   | 1.44 (0.32-6.24)              | 1.40 (0.05-36.7)        | 1.58 (0.05-51.3)        | -                       | -                       | -                       |
| LFI  | LFBC  | -                             | -                       | -                       | 0.89 (0.45-1.74)        | 0.89 (0.34-2.29)        | 0.79 (0.25-2.33)        |
| LFI  | LFP   | 2.18 (0.50-9.82)              | 2.08 (0.12-37.5)        | 2.29 (0.10-53.1)        | 0.79 (0.31-2.00)        | 0.78 (0.26-2.38)        | 0.68 (0.19-2.40)        |
| LFI  | XB    | -                             | -                       | -                       | 0.55 (0.23-1.33)        | 0.54 (0.17-1.75)        | 0.50 (0.13-1.80)        |
| LFI  | XI    | 3.80 (0.84-21.6)              | 3.45 (0.19-68.6)        | 3.53 (0.17-81.9)        | -                       | -                       | -                       |
| LFI  | XIB   | 1.05 (0.63-1.75)              | 0.93 (0.14-6.36)        | 0.96 (0.12-7.76)        | 1.28 (0.64-2.60)        | 1.27 (0.50-3.16)        | 1.16 (0.39-3.23)        |
| LFI  | XO    | <b>0.65 (0.47-0.90)</b>       | 0.73 (0.21-2.56)        | 0.74 (0.20-2.81)        | -                       | -                       | -                       |
| LFI  | XOB   | 1.39 (0.34-5.47)              | 1.41 (0.07-28.7)        | 1.59 (0.06-40.2)        | <b>0.29 (0.09-0.88)</b> | 0.29 (0.07-1.08)        | 0.26 (0.06-1.07)        |
| LFI  | XOBC  | 2.30 (0.55-9.50)              | 2.34 (0.07-71.8)        | 2.61 (0.07-101)         | 0.47 (0.14-1.50)        | 0.46 (0.11-1.99)        | 0.42 (0.08-1.98)        |
| LFI  | X     | -                             | -                       | -                       | 0.58 (0.21-1.61)        | 0.57 (0.14-2.24)        | 0.52 (0.11-2.37)        |
| LFI  | O     | <b>0.47 (0.29-0.76)</b>       | 0.47 (0.09-2.52)        | 0.47 (0.08-2.77)        | -                       | -                       | -                       |
| LFIB | LFIC  | <b>2.32 (1.80-3.00)</b>       | 2.20 (0.68-7.08)        | 2.15 (0.61-7.64)        | 1.32 (0.58-3.07)        | 1.31 (0.42-3.81)        | 1.22 (0.33-4.06)        |
| LFIB | LFIP  | <b>2.73 (2.02-3.70)</b>       | <b>2.99 (1.11-8.11)</b> | <b>3.07 (1.05-9.13)</b> | 1.88 (1.39-2.55)        | 1.83 (1.07-2.89)        | 1.47 (0.72-2.87)        |
| LFIB | LFIBP | 1.03 (0.63-1.67)              | 3.13 (0.78-14.5)        | 3.30 (0.69-18.1)        | -                       | -                       | -                       |
| LFIB | LFO   | <b>1.47 (1.04-2.06)</b>       | 1.71 (0.53-5.64)        | 1.69 (0.47-6.12)        | 0.68 (0.42-1.11)        | 0.67 (0.33-1.29)        | 0.63 (0.28-1.30)        |
| LFIB | LFOB  | 2.19 (0.54-8.42)              | 2.35 (0.14-41.8)        | 2.56 (0.13-47.3)        | 0.84 (0.58-1.21)        | 0.85 (0.49-1.45)        | 0.83 (0.45-1.54)        |
| LFIB | LFOC  | <b>2.41 (1.56-3.74)</b>       | 2.51 (0.60-10.4)        | 2.47 (0.54-11.4)        | 1.20 (0.59-2.51)        | 1.18 (0.43-3.05)        | 1.11 (0.36-3.21)        |
| LFIB | LFOP  | <b>4.47 (1.38-14.9)</b>       | 4.87 (0.53-45.8)        | 5.16 (0.51-52.8)        | 1.10 (0.69-1.75)        | 1.12 (0.60-2.10)        | 1.05 (0.53-2.17)        |
| LFIB | LFOIB | <b>4.55 (1.06-18.8)</b>       | 5.85 (0.25-143)         | 6.46 (0.24-168)         | 0.73 (0.41-1.30)        | 0.73 (0.33-1.60)        | 0.72 (0.30-1.70)        |
| LFIB | LF    | <b>0.61 (0.41-0.91)</b>       | 0.66 (0.17-2.57)        | 0.64 (0.15-2.82)        | -                       | -                       | -                       |
| LFIB | LFB   | 1.86 (0.41-8.19)              | 2.04 (0.08-54.2)        | 2.24 (0.07-63.0)        | -                       | -                       | -                       |
| LFIB | LFBC  | -                             | -                       | -                       | 1.12 (0.59-2.12)        | 1.13 (0.46-2.75)        | 1.10 (0.41-3.01)        |
| LFIB | LFP   | 2.81 (0.64-12.8)              | 3.04 (0.17-55.6)        | 3.22 (0.16-64.6)        | 0.99 (0.39-2.50)        | 0.99 (0.33-3.04)        | 0.94 (0.28-3.27)        |
| LFIB | XB    | -                             | -                       | -                       | 0.69 (0.30-1.60)        | 0.68 (0.24-2.04)        | 0.69 (0.22-2.27)        |
| LFIB | XI    | 4.90 (1.10-27.6)              | 5.05 (0.32-86.9)        | 4.99 (0.31-90.9)        | -                       | -                       | -                       |
| LFIB | XIB   | 1.36 (0.86-2.14)              | 1.36 (0.25-7.43)        | 1.35 (0.24-7.67)        | 1.61 (0.84-3.12)        | 1.60 (0.71-3.60)        | 1.61 (0.67-3.92)        |
| LFIB | XO    | 0.84 (0.57-1.25)              | 1.07 (0.24-4.91)        | 1.05 (0.21-5.25)        | -                       | -                       | -                       |
| LFIB | XOB   | 1.80 (0.43-7.12)              | 2.06 (0.10-42.7)        | 2.24 (0.10-48.5)        | 0.37 (0.11-1.09)        | 0.36 (0.10-1.30)        | 0.36 (0.09-1.43)        |
| LFIB | XOBC  | 2.97 (0.69-12.4)              | 3.41 (0.11-107)         | 3.70 (0.10-127)         | 0.59 (0.18-1.86)        | 0.58 (0.14-2.43)        | 0.59 (0.13-2.68)        |
| LFIB | X     | -                             | -                       | -                       | 0.73 (0.27-1.97)        | 0.72 (0.20-2.64)        | 0.72 (0.18-3.06)        |
| LFIB | O     | 0.61 (0.36-1.04)              | 0.68 (0.10-4.54)        | 0.67 (0.09-4.89)        | -                       | -                       | -                       |
| LFIC | LFIP  | 1.18 (0.87-1.60)              | 1.36 (0.35-5.25)        | 1.43 (0.30-6.88)        | 1.42 (0.61-3.31)        | 1.40 (0.46-4.32)        | 1.20 (0.34-4.51)        |

| T1    | T2    | Adverse events grade ≥3 |                         |                  | Serious adverse events  |                         |                         |
|-------|-------|-------------------------|-------------------------|------------------|-------------------------|-------------------------|-------------------------|
|       |       | Fixed effects           | Random effects          | Meta-regression  | Fixed effects           | Random effects          | Meta-regression         |
| LFIC  | LFIBP | <b>0.44 (0.28-0.71)</b> | 1.42 (0.32-7.54)        | 1.53 (0.24-11.3) | -                       | -                       | -                       |
| LFIC  | LFO   | <b>0.63 (0.46-0.87)</b> | 0.78 (0.23-2.72)        | 0.78 (0.22-2.84) | 0.51 (0.26-1.00)        | 0.51 (0.21-1.23)        | 0.51 (0.19-1.39)        |
| LFIC  | LFOB  | 0.94 (0.23-3.62)        | 1.06 (0.05-22.3)        | 1.19 (0.05-27.4) | 0.63 (0.28-1.43)        | 0.65 (0.22-2.07)        | 0.68 (0.20-2.52)        |
| LFIC  | LFOC  | 1.04 (0.70-1.54)        | 1.15 (0.38-3.42)        | 1.14 (0.37-3.56) | 0.91 (0.60-1.37)        | 0.91 (0.54-1.56)        | 0.91 (0.51-1.65)        |
| LFIC  | LFOP  | 1.93 (0.60-6.46)        | 2.21 (0.20-25.1)        | 2.40 (0.18-31.7) | 0.83 (0.40-1.69)        | 0.86 (0.33-2.44)        | 0.86 (0.29-2.84)        |
| LFIC  | LFOIB | 1.96 (0.46-8.07)        | 2.65 (0.10-74.4)        | 2.99 (0.09-94.6) | 0.55 (0.22-1.39)        | 0.57 (0.16-2.08)        | 0.58 (0.15-2.48)        |
| LFIC  | LF    | <b>0.26 (0.18-0.39)</b> | 0.30 (0.07-1.26)        | 0.30 (0.07-1.29) | -                       | -                       | -                       |
| LFIC  | LFB   | 0.80 (0.18-3.53)        | 0.93 (0.03-28.3)        | 1.04 (0.03-35.4) | -                       | -                       | -                       |
| LFIC  | LFBC  | -                       | -                       | -                | 0.84 (0.32-2.22)        | 0.87 (0.24-3.32)        | 0.90 (0.21-4.22)        |
| LFIC  | LFP   | 1.22 (0.28-5.52)        | 1.39 (0.07-29.6)        | 1.50 (0.06-37.0) | 0.75 (0.26-2.16)        | 0.77 (0.21-3.10)        | 0.78 (0.18-3.69)        |
| LFIC  | XB    | -                       | -                       | -                | 0.52 (0.16-1.72)        | 0.52 (0.11-2.57)        | 0.56 (0.11-3.27)        |
| LFIC  | XI    | 2.12 (0.46-12.1)        | 2.31 (0.11-50.4)        | 2.32 (0.11-55.6) | -                       | -                       | -                       |
| LFIC  | XIB   | <b>0.58 (0.35-0.99)</b> | 0.62 (0.08-4.87)        | 0.63 (0.07-5.32) | 1.22 (0.42-3.55)        | 1.23 (0.32-5.07)        | 1.32 (0.30-6.35)        |
| LFIC  | XO    | <b>0.36 (0.25-0.53)</b> | 0.49 (0.11-2.31)        | 0.49 (0.10-2.46) | -                       | -                       | -                       |
| LFIC  | XOB   | 0.77 (0.19-3.06)        | 0.94 (0.04-22.5)        | 1.04 (0.04-27.8) | 0.28 (0.07-1.03)        | 0.28 (0.06-1.37)        | 0.30 (0.05-1.77)        |
| LFIC  | XOBC  | 1.28 (0.30-5.33)        | 1.55 (0.04-55.1)        | 1.72 (0.04-69.9) | 0.45 (0.11-1.75)        | 0.45 (0.08-2.45)        | 0.48 (0.08-3.28)        |
| LFIC  | X     | -                       | -                       | -                | 0.55 (0.15-2.02)        | 0.55 (0.10-3.12)        | 0.58 (0.09-4.12)        |
| LFIC  | O     | <b>0.26 (0.16-0.44)</b> | 0.31 (0.05-2.14)        | 0.31 (0.04-2.29) | -                       | -                       | -                       |
| LFIP  | LFIBP | <b>0.38 (0.23-0.61)</b> | 1.04 (0.25-5.05)        | 1.07 (0.24-5.50) | -                       | -                       | -                       |
| LFIP  | LFO   | <b>0.54 (0.38-0.76)</b> | 0.57 (0.16-2.00)        | 0.55 (0.12-2.43) | <b>0.36 (0.22-0.60)</b> | <b>0.37 (0.18-0.73)</b> | <b>0.43 (0.18-0.95)</b> |
| LFIP  | LFOB  | 0.80 (0.20-3.00)        | 0.79 (0.05-11.6)        | 0.83 (0.05-12.6) | <b>0.45 (0.29-0.70)</b> | <b>0.46 (0.25-0.93)</b> | 0.56 (0.26-1.30)        |
| LFIP  | LFOC  | 0.88 (0.56-1.39)        | 0.84 (0.18-3.92)        | 0.80 (0.14-4.67) | 0.64 (0.31-1.35)        | 0.65 (0.24-1.73)        | 0.76 (0.23-2.30)        |
| LFIP  | LFOP  | 1.63 (0.53-5.30)        | 1.63 (0.22-12.2)        | 1.68 (0.22-13.1) | <b>0.59 (0.36-0.95)</b> | 0.61 (0.33-1.20)        | 0.72 (0.34-1.56)        |
| LFIP  | LFOIB | 1.66 (0.40-6.68)        | 1.95 (0.10-40.2)        | 2.10 (0.09-45.6) | <b>0.39 (0.21-0.73)</b> | <b>0.40 (0.17-0.99)</b> | 0.49 (0.18-1.39)        |
| LFIP  | LF    | <b>0.22 (0.15-0.33)</b> | <b>0.22 (0.05-0.90)</b> | 0.21 (0.04-1.10) | -                       | -                       | -                       |
| LFIP  | LFB   | 0.68 (0.16-2.91)        | 0.69 (0.03-15.4)        | 0.73 (0.03-17.4) | -                       | -                       | -                       |
| LFIP  | LFBC  | -                       | -                       | -                | 0.59 (0.30-1.18)        | 0.61 (0.24-1.67)        | 0.74 (0.25-2.43)        |
| LFIP  | LFP   | 1.03 (0.24-4.55)        | 1.02 (0.07-15.6)        | 1.05 (0.06-17.2) | 0.53 (0.21-1.34)        | 0.54 (0.18-1.71)        | 0.65 (0.19-2.26)        |
| LFIP  | XB    | -                       | -                       | -                | <b>0.37 (0.15-0.90)</b> | 0.37 (0.12-1.28)        | 0.47 (0.12-1.91)        |
| LFIP  | XI    | 1.80 (0.39-10.3)        | 1.69 (0.09-34.3)        | 1.63 (0.08-36.3) | -                       | -                       | -                       |
| LFIP  | XIB   | <b>0.50 (0.29-0.86)</b> | 0.45 (0.06-3.21)        | 0.44 (0.06-3.36) | 0.86 (0.42-1.76)        | 0.87 (0.35-2.34)        | 1.10 (0.36-3.43)        |
| LFIP  | XO    | <b>0.31 (0.21-0.46)</b> | 0.36 (0.08-1.69)        | 0.34 (0.06-2.02) | -                       | -                       | -                       |
| LFIP  | XOB   | 0.66 (0.16-2.53)        | 0.69 (0.04-11.9)        | 0.73 (0.04-13.2) | <b>0.19 (0.06-0.59)</b> | <b>0.20 (0.05-0.76)</b> | 0.25 (0.06-1.09)        |
| LFIP  | XOBC  | 1.09 (0.26-4.41)        | 1.14 (0.04-30.5)        | 1.21 (0.04-35.1) | 0.31 (0.09-1.02)        | 0.32 (0.07-1.41)        | 0.40 (0.08-2.02)        |
| LFIP  | X     | -                       | -                       | -                | 0.39 (0.14-1.09)        | 0.39 (0.10-1.63)        | 0.49 (0.10-2.47)        |
| LFIP  | O     | <b>0.22 (0.13-0.38)</b> | 0.23 (0.03-1.55)        | 0.22 (0.03-1.82) | -                       | -                       | -                       |
| LFIBP | LFO   | 1.42 (0.87-2.34)        | 0.55 (0.13-2.09)        | 0.51 (0.08-2.85) | -                       | -                       | -                       |
| LFIBP | LFOB  | 2.12 (0.50-8.67)        | 0.75 (0.03-15.4)        | 0.77 (0.03-16.3) | -                       | -                       | -                       |
| LFIBP | LFOC  | <b>2.34 (1.31-4.19)</b> | 0.80 (0.13-4.21)        | 0.75 (0.09-5.42) | -                       | -                       | -                       |
| LFIBP | LFOP  | <b>4.33 (1.27-15.4)</b> | 1.56 (0.12-17.8)        | 1.57 (0.11-19.2) | -                       | -                       | -                       |
| LFIBP | LFOIB | 4.40 (0.98-19.3)        | 1.87 (0.06-51.4)        | 1.94 (0.06-56.9) | -                       | -                       | -                       |
| LFIBP | LF    | 0.60 (0.35-1.02)        | 0.21 (0.04-0.92)        | 0.19 (0.03-1.27) | -                       | -                       | -                       |
| LFIBP | LFB   | 1.80 (0.38-8.33)        | 0.66 (0.02-19.4)        | 0.68 (0.02-21.1) | -                       | -                       | -                       |
| LFIBP | LFP   | 2.72 (0.59-13.0)        | 0.97 (0.04-20.8)        | 0.98 (0.04-22.2) | -                       | -                       | -                       |
| LFIBP | XI    | 4.77 (0.99-28.5)        | 1.61 (0.07-37.1)        | 1.51 (0.06-39.7) | -                       | -                       | -                       |

| T1    | T2    | Adverse events grade $\geq 3$ |                         |                         | Serious adverse events  |                         |                         |
|-------|-------|-------------------------------|-------------------------|-------------------------|-------------------------|-------------------------|-------------------------|
|       |       | Fixed effects                 | Random effects          | Meta-regression         | Fixed effects           | Random effects          | Meta-regression         |
| LFIBP | XIB   | 1.32 (0.68-2.58)              | 0.44 (0.04-3.75)        | 0.41 (0.04-4.09)        | -                       | -                       | -                       |
| LFIBP | XO    | 0.82 (0.48-1.40)              | 0.34 (0.06-1.71)        | 0.32 (0.04-2.26)        | -                       | -                       | -                       |
| LFIBP | XOB   | 1.74 (0.40-7.33)              | 0.66 (0.02-15.4)        | 0.68 (0.02-16.4)        | -                       | -                       | -                       |
| LFIBP | XOBC  | 2.88 (0.64-12.7)              | 1.10 (0.03-37.3)        | 1.13 (0.02-41.2)        | -                       | -                       | -                       |
| LFIBP | O     | 0.59 (0.31-1.13)              | 0.22 (0.03-1.53)        | 0.20 (0.02-1.97)        | -                       | -                       | -                       |
| LFO   | LFOB  | 1.49 (0.37-5.78)              | 1.37 (0.07-26.8)        | 1.52 (0.06-33.3)        | 1.24 (0.79-1.95)        | 1.27 (0.65-2.66)        | 1.32 (0.64-2.99)        |
| LFO   | LFOC  | <b>1.65 (1.12-2.41)</b>       | 1.46 (0.40-5.23)        | 1.46 (0.38-5.46)        | <b>1.77 (1.05-3.06)</b> | 1.77 (0.87-3.59)        | 1.77 (0.80-3.90)        |
| LFO   | LFOP  | 3.05 (0.94-10.3)              | 2.83 (0.27-30.2)        | 3.06 (0.24-38.2)        | <b>1.62 (1.29-2.04)</b> | <b>1.67 (1.09-2.88)</b> | <b>1.67 (1.01-3.16)</b> |
| LFO   | LFOIB | 3.10 (0.71-12.9)              | 3.40 (0.13-90.7)        | 3.80 (0.12-117)         | 1.07 (0.57-2.02)        | 1.10 (0.46-2.83)        | 1.15 (0.44-3.19)        |
| LFO   | LF    | <b>0.42 (0.32-0.55)</b>       | <b>0.38 (0.16-0.91)</b> | <b>0.38 (0.15-0.92)</b> | -                       | -                       | -                       |
| LFO   | LFB   | 1.27 (0.28-5.62)              | 1.20 (0.04-34.2)        | 1.32 (0.04-42.8)        | -                       | -                       | -                       |
| LFO   | LFBC  | -                             | -                       | -                       | 1.64 (0.82-3.30)        | 1.69 (0.65-4.62)        | 1.75 (0.61-5.57)        |
| LFO   | LFP   | 1.92 (0.43-8.81)              | 1.78 (0.09-35.5)        | 1.91 (0.08-44.6)        | 1.46 (0.63-3.35)        | 1.49 (0.55-4.32)        | 1.52 (0.50-4.86)        |
| LFO   | XB    | -                             | -                       | -                       | 1.02 (0.39-2.72)        | 1.03 (0.30-3.83)        | 1.10 (0.27-4.79)        |
| LFO   | XI    | 3.35 (0.73-19.3)              | 2.96 (0.15-64.5)        | 2.96 (0.14-71.1)        | -                       | -                       | -                       |
| LFO   | XIB   | 0.93 (0.52-1.64)              | 0.79 (0.10-6.25)        | 0.80 (0.09-6.84)        | <b>2.37 (1.05-5.43)</b> | 2.39 (0.84-7.17)        | 2.59 (0.81-8.71)        |
| LFO   | XO    | <b>0.57 (0.47-0.70)</b>       | 0.62 (0.24-1.63)        | 0.62 (0.23-1.68)        | -                       | -                       | -                       |
| LFO   | XOB   | 1.23 (0.29-4.88)              | 1.20 (0.05-27.0)        | 1.33 (0.05-33.8)        | 0.54 (0.16-1.68)        | 0.54 (0.14-2.08)        | 0.59 (0.14-2.44)        |
| LFO   | XOBC  | 2.02 (0.47-8.52)              | 2.00 (0.06-65.9)        | 2.19 (0.05-85.6)        | 0.87 (0.25-2.87)        | 0.87 (0.20-3.83)        | 0.95 (0.19-4.66)        |
| LFO   | X     | -                             | -                       | -                       | 1.07 (0.36-3.25)        | 1.07 (0.25-4.77)        | 1.16 (0.23-6.18)        |
| LFO   | O     | <b>0.42 (0.27-0.64)</b>       | 0.40 (0.09-1.81)        | 0.39 (0.08-1.90)        | -                       | -                       | -                       |
| LFOB  | LFOC  | 1.11 (0.28-4.66)              | 1.07 (0.05-23.5)        | 0.96 (0.04-25.6)        | 1.43 (0.72-2.92)        | 1.40 (0.50-3.64)        | 1.34 (0.42-3.90)        |
| LFOB  | LFOP  | <b>2.05 (1.02-4.32)</b>       | 2.07 (0.35-12.5)        | 2.03 (0.33-12.8)        | 1.31 (0.87-1.98)        | 1.33 (0.74-2.36)        | 1.26 (0.68-2.42)        |
| LFOB  | LFOIB | <b>2.07 (1.34-3.25)</b>       | 2.48 (0.65-9.88)        | 2.52 (0.64-10.4)        | 0.87 (0.55-1.35)        | 0.87 (0.49-1.53)        | 0.86 (0.46-1.60)        |
| LFOB  | LF    | 0.28 (0.07-1.16)              | 0.28 (0.01-5.81)        | 0.25 (0.01-6.43)        | -                       | -                       | -                       |
| LFOB  | LFB   | 0.85 (0.47-1.56)              | 0.87 (0.18-4.29)        | 0.87 (0.17-4.50)        | -                       | -                       | -                       |
| LFOB  | LFBC  | -                             | -                       | -                       | 1.33 (0.78-2.26)        | 1.34 (0.66-2.71)        | 1.32 (0.61-2.92)        |
| LFOB  | LFP   | 1.30 (0.40-4.13)              | 1.30 (0.10-17.2)        | 1.27 (0.09-18.1)        | 1.18 (0.48-2.90)        | 1.18 (0.40-3.49)        | 1.14 (0.35-3.66)        |
| LFOB  | XB    | -                             | -                       | -                       | 0.82 (0.33-2.07)        | 0.81 (0.24-2.70)        | 0.83 (0.22-3.21)        |
| LFOB  | XI    | 2.27 (0.30-20.1)              | 2.17 (0.04-119)         | 1.98 (0.03-121)         | -                       | -                       | -                       |
| LFOB  | XIB   | 0.62 (0.15-2.71)              | 0.58 (0.02-15.8)        | 0.53 (0.02-16.1)        | 1.92 (0.91-4.09)        | 1.89 (0.72-4.98)        | 1.95 (0.66-5.74)        |
| LFOB  | XO    | 0.39 (0.10-1.59)              | 0.45 (0.02-10.3)        | 0.41 (0.02-11.2)        | -                       | -                       | -                       |
| LFOB  | XOB   | 0.82 (0.63-1.08)              | 0.87 (0.33-2.33)        | 0.88 (0.32-2.41)        | 0.43 (0.14-1.23)        | 0.42 (0.13-1.35)        | 0.44 (0.13-1.44)        |
| LFOB  | XOBC  | 1.36 (0.88-2.13)              | 1.45 (0.21-9.95)        | 1.45 (0.20-10.6)        | 0.70 (0.22-2.10)        | 0.69 (0.18-2.51)        | 0.71 (0.18-2.76)        |
| LFOB  | X     | -                             | -                       | -                       | 0.86 (0.30-2.50)        | 0.85 (0.21-3.44)        | 0.87 (0.19-4.15)        |
| LFOB  | O     | 0.28 (0.07-1.20)              | 0.29 (0.01-7.90)        | 0.26 (0.01-8.63)        | -                       | -                       | -                       |
| LFOC  | LFOP  | 1.85 (0.55-6.48)              | 1.94 (0.16-24.8)        | 2.10 (0.14-31.0)        | 0.91 (0.51-1.62)        | 0.95 (0.42-2.30)        | 0.94 (0.38-2.62)        |
| LFOC  | LFOIB | 1.88 (0.42-8.09)              | 2.32 (0.08-71.1)        | 2.60 (0.08-91.4)        | 0.60 (0.26-1.38)        | 0.63 (0.20-2.01)        | 0.64 (0.18-2.42)        |
| LFOC  | LF    | <b>0.25 (0.16-0.40)</b>       | 0.26 (0.06-1.18)        | 0.26 (0.06-1.22)        | -                       | -                       | -                       |
| LFOC  | LFB   | 0.77 (0.16-3.53)              | 0.82 (0.03-26.9)        | 0.91 (0.02-33.7)        | -                       | -                       | -                       |
| LFOC  | LFBC  | -                             | -                       | -                       | 0.93 (0.38-2.22)        | 0.96 (0.29-3.29)        | 0.99 (0.27-4.10)        |
| LFOC  | LFP   | 1.17 (0.26-5.53)              | 1.21 (0.05-28.4)        | 1.31 (0.05-35.5)        | 0.82 (0.30-2.20)        | 0.84 (0.25-3.15)        | 0.85 (0.22-3.60)        |
| LFOC  | XB    | -                             | -                       | -                       | 0.58 (0.19-1.75)        | 0.58 (0.14-2.57)        | 0.62 (0.13-3.31)        |
| LFOC  | XI    | 2.04 (0.43-12.1)              | 2.01 (0.09-49.0)        | 2.04 (0.08-53.8)        | -                       | -                       | -                       |
| LFOC  | XIB   | 0.56 (0.30-1.06)              | 0.54 (0.06-5.02)        | 0.55 (0.06-5.44)        | 1.34 (0.50-3.57)        | 1.35 (0.38-4.99)        | 1.46 (0.37-6.18)        |



| T1    | T2    | Adverse events grade ≥3 |                  |                  | Serious adverse events |                  |                  |
|-------|-------|-------------------------|------------------|------------------|------------------------|------------------|------------------|
|       |       | Fixed effects           | Random effects   | Meta-regression  | Fixed effects          | Random effects   | Meta-regression  |
| LFOC  | XO    | <b>0.35 (0.23-0.54)</b> | 0.43 (0.09-2.11) | 0.43 (0.08-2.24) | -                      | -                | -                |
| LFOC  | XOB   | 0.74 (0.17-3.07)        | 0.82 (0.03-21.6) | 0.91 (0.03-27.0) | 0.30 (0.08-1.07)       | 0.30 (0.07-1.36) | 0.33 (0.06-1.73) |
| LFOC  | XOBC  | 1.23 (0.28-5.33)        | 1.36 (0.03-51.7) | 1.51 (0.03-66.0) | 0.49 (0.13-1.82)       | 0.49 (0.10-2.48) | 0.53 (0.09-3.26) |
| LFOC  | X     | -                       | -                | -                | 0.60 (0.18-2.07)       | 0.61 (0.12-3.11) | 0.65 (0.11-4.12) |
| LFOC  | O     | <b>0.25 (0.14-0.45)</b> | 0.27 (0.04-1.96) | 0.27 (0.04-2.09) | -                      | -                | -                |
| LFOP  | LFOIB | 1.01 (0.42-2.30)        | 1.20 (0.13-11.5) | 1.24 (0.13-12.9) | 0.66 (0.36-1.21)       | 0.65 (0.29-1.50) | 0.68 (0.28-1.64) |
| LFOP  | LF    | <b>0.14 (0.04-0.45)</b> | 0.13 (0.01-1.54) | 0.12 (0.01-1.73) | -                      | -                | -                |
| LFOP  | LFB   | 0.41 (0.16-1.05)        | 0.42 (0.04-4.50) | 0.43 (0.04-4.99) | -                      | -                | -                |
| LFOP  | LFBC  | -                       | -                | -                | 1.01 (0.52-1.98)       | 1.01 (0.40-2.46) | 1.05 (0.38-2.87) |
| LFOP  | LFP   | 0.63 (0.25-1.54)        | 0.63 (0.10-3.97) | 0.62 (0.09-4.20) | 0.90 (0.40-2.00)       | 0.89 (0.36-2.23) | 0.90 (0.33-2.42) |
| LFOP  | XB    | -                       | -                | -                | 0.63 (0.24-1.66)       | 0.61 (0.18-2.12) | 0.66 (0.17-2.63) |
| LFOP  | XI    | 1.11 (0.16-8.78)        | 1.04 (0.03-38.2) | 0.97 (0.03-38.7) | -                      | -                | -                |
| LFOP  | XIB   | 0.30 (0.08-1.08)        | 0.28 (0.02-4.48) | 0.26 (0.01-4.67) | 1.46 (0.66-3.30)       | 1.43 (0.51-3.99) | 1.54 (0.49-4.80) |
| LFOP  | XO    | <b>0.19 (0.05-0.62)</b> | 0.22 (0.02-2.78) | 0.20 (0.01-3.06) | -                      | -                | -                |
| LFOP  | XOB   | <b>0.40 (0.18-0.85)</b> | 0.42 (0.06-3.19) | 0.43 (0.05-3.50) | 0.33 (0.10-1.02)       | 0.32 (0.08-1.15) | 0.35 (0.09-1.32) |
| LFOP  | XOBC  | 0.66 (0.28-1.52)        | 0.70 (0.05-9.48) | 0.71 (0.05-10.7) | 0.54 (0.16-1.75)       | 0.52 (0.12-2.12) | 0.56 (0.12-2.50) |
| LFOP  | X     | -                       | -                | -                | 0.66 (0.22-1.98)       | 0.64 (0.15-2.69) | 0.69 (0.14-3.43) |
| LFOP  | O     | <b>0.14 (0.04-0.48)</b> | 0.14 (0.01-2.24) | 0.13 (0.01-2.53) | -                      | -                | -                |
| LFOIB | LF    | <b>0.14 (0.03-0.60)</b> | 0.11 (0.00-3.07) | 0.10 (0.00-3.33) | -                      | -                | -                |
| LFOIB | LFB   | <b>0.41 (0.19-0.87)</b> | 0.35 (0.04-2.78) | 0.35 (0.04-2.90) | -                      | -                | -                |
| LFOIB | LFBC  | -                       | -                | -                | 1.54 (0.77-3.07)       | 1.54 (0.62-3.84) | 1.53 (0.57-4.20) |
| LFOIB | LFP   | 0.62 (0.18-2.18)        | 0.52 (0.03-9.46) | 0.50 (0.02-9.95) | 1.36 (0.50-3.71)       | 1.36 (0.39-4.71) | 1.33 (0.35-5.00) |
| LFOIB | XB    | -                       | -                | -                | 0.95 (0.34-2.63)       | 0.94 (0.25-3.55) | 0.96 (0.22-4.28) |
| LFOIB | XI    | 1.10 (0.14-10.1)        | 0.87 (0.01-61.0) | 0.79 (0.01-60.0) | -                      | -                | -                |
| LFOIB | XIB   | 0.30 (0.07-1.38)        | 0.23 (0.01-8.33) | 0.21 (0.01-8.39) | 2.22 (0.93-5.32)       | 2.19 (0.71-6.73) | 2.24 (0.65-7.93) |
| LFOIB | XO    | <b>0.19 (0.04-0.81)</b> | 0.18 (0.01-5.53) | 0.16 (0.00-5.77) | -                      | -                | -                |
| LFOIB | XOB   | <b>0.40 (0.23-0.67)</b> | 0.35 (0.06-1.82) | 0.35 (0.06-1.90) | 0.50 (0.15-1.56)       | 0.49 (0.13-1.78) | 0.51 (0.13-1.96) |
| LFOIB | XOBC  | 0.66 (0.35-1.23)        | 0.58 (0.05-5.92) | 0.58 (0.05-6.36) | 0.81 (0.24-2.66)       | 0.79 (0.18-3.28) | 0.83 (0.18-3.66) |
| LFOIB | X     | -                       | -                | -                | 1.00 (0.32-3.16)       | 0.97 (0.22-4.42) | 1.01 (0.19-5.52) |
| LFOIB | O     | <b>0.14 (0.03-0.62)</b> | 0.12 (0.00-4.17) | 0.10 (0.00-4.42) | -                      | -                | -                |
| LF    | LFB   | 3.03 (0.66-13.7)        | 3.12 (0.10-96.1) | 3.47 (0.09-124)  | -                      | -                | -                |
| LF    | LFP   | <b>4.59 (1.03-21.5)</b> | 4.65 (0.22-99.8) | 5.00 (0.19-131)  | -                      | -                | -                |
| LF    | XI    | <b>8.04 (1.70-46.8)</b> | 7.72 (0.36-178)  | 7.75 (0.33-203)  | -                      | -                | -                |
| LF    | XIB   | <b>2.21 (1.21-4.07)</b> | 2.06 (0.24-18.2) | 2.11 (0.22-20.3) | -                      | -                | -                |
| LF    | XO    | 1.37 (0.98-1.92)        | 1.62 (0.51-5.36) | 1.63 (0.49-5.62) | -                      | -                | -                |
| LF    | XOB   | 2.93 (0.69-11.9)        | 3.15 (0.13-76.0) | 3.47 (0.12-98.0) | -                      | -                | -                |
| LF    | XOBC  | 4.84 (1.11-20.6)        | 5.19 (0.14-187)  | 5.74 (0.13-244)  | -                      | -                | -                |
| LF    | O     | 1.00 (0.65-1.52)        | 1.03 (0.23-4.77) | 1.03 (0.22-5.03) | -                      | -                | -                |
| LFB   | LFP   | 1.53 (0.41-5.63)        | 1.49 (0.07-30.8) | 1.45 (0.06-33.4) | -                      | -                | -                |
| LFB   | XI    | 2.69 (0.32-25.6)        | 2.48 (0.03-184)  | 2.27 (0.03-188)  | -                      | -                | -                |
| LFB   | XIB   | 0.73 (0.16-3.54)        | 0.66 (0.02-26.0) | 0.61 (0.01-26.6) | -                      | -                | -                |
| LFB   | XO    | 0.45 (0.10-2.08)        | 0.52 (0.02-17.1) | 0.47 (0.01-18.7) | -                      | -                | -                |
| LFB   | XOB   | 0.97 (0.53-1.76)        | 1.00 (0.20-4.88) | 1.00 (0.20-5.15) | -                      | -                | -                |
| LFB   | XOBC  | 1.60 (0.79-3.22)        | 1.65 (0.17-16.5) | 1.66 (0.16-17.7) | -                      | -                | -                |
| LFB   | O     | 0.33 (0.07-1.58)        | 0.33 (0.01-13.2) | 0.30 (0.01-14.2) | -                      | -                | -                |

| T1   | T2   | Adverse events grade $\geq 3$ |                  |                  | Serious adverse events  |                         |                         |
|------|------|-------------------------------|------------------|------------------|-------------------------|-------------------------|-------------------------|
|      |      | Fixed effects                 | Random effects   | Meta-regression  | Fixed effects           | Random effects          | Meta-regression         |
| LFBC | LFP  | -                             | -                | -                | 0.88 (0.31-2.52)        | 0.88 (0.25-3.22)        | 0.86 (0.21-3.47)        |
| LFBC | XB   | -                             | -                | -                | 0.62 (0.22-1.78)        | 0.61 (0.15-2.46)        | 0.63 (0.14-2.96)        |
| LFBC | XIB  | -                             | -                | -                | 1.44 (0.58-3.61)        | 1.43 (0.42-4.68)        | 1.46 (0.39-5.55)        |
| LFBC | XOB  | -                             | -                | -                | 0.33 (0.10-1.06)        | 0.32 (0.08-1.24)        | 0.33 (0.08-1.36)        |
| LFBC | XOBC | -                             | -                | -                | 0.53 (0.15-1.80)        | 0.51 (0.12-2.24)        | 0.54 (0.11-2.56)        |
| LFBC | X    | -                             | -                | -                | 0.65 (0.20-2.12)        | 0.64 (0.13-3.05)        | 0.66 (0.12-3.73)        |
| LFP  | XB   | -                             | -                | -                | 0.70 (0.20-2.45)        | 0.69 (0.15-3.24)        | 0.73 (0.13-4.03)        |
| LFP  | XI   | 1.77 (0.21-16.9)              | 1.67 (0.03-94.7) | 1.56 (0.03-99.7) | -                       | -                       | -                       |
| LFP  | XIB  | 0.48 (0.10-2.28)              | 0.45 (0.02-12.7) | 0.42 (0.01-13.3) | 1.63 (0.53-5.09)        | 1.61 (0.41-6.46)        | 1.71 (0.36-7.71)        |
| LFP  | XO   | 0.30 (0.06-1.33)              | 0.35 (0.02-8.16) | 0.33 (0.01-8.81) | -                       | -                       | -                       |
| LFP  | XOB  | 0.63 (0.19-2.09)              | 0.67 (0.04-10.6) | 0.69 (0.04-11.8) | 0.37 (0.09-1.47)        | 0.36 (0.07-1.73)        | 0.39 (0.07-2.03)        |
| LFP  | XOBC | 1.05 (0.30-3.63)              | 1.11 (0.04-27.5) | 1.14 (0.04-31.7) | 0.60 (0.14-2.50)        | 0.58 (0.10-3.14)        | 0.63 (0.10-3.78)        |
| LFP  | X    | -                             | -                | -                | 0.73 (0.19-2.85)        | 0.72 (0.13-3.91)        | 0.76 (0.11-5.05)        |
| LFP  | O    | 0.22 (0.04-1.01)              | 0.22 (0.01-6.22) | 0.21 (0.01-6.97) | -                       | -                       | -                       |
| XB   | XIB  | -                             | -                | -                | <b>2.33 (1.37-3.95)</b> | <b>2.34 (1.14-4.73)</b> | <b>2.33 (1.07-5.07)</b> |
| XB   | XOB  | -                             | -                | -                | 0.53 (0.13-2.07)        | 0.52 (0.10-2.83)        | 0.53 (0.09-3.18)        |
| XB   | XOBC | -                             | -                | -                | 0.85 (0.20-3.51)        | 0.84 (0.14-5.06)        | 0.85 (0.12-5.75)        |
| XB   | X    | -                             | -                | -                | 1.05 (0.62-1.77)        | 1.04 (0.52-2.12)        | 1.04 (0.48-2.29)        |
| XI   | XIB  | 0.28 (0.05-1.13)              | 0.27 (0.03-2.37) | 0.27 (0.03-2.43) | -                       | -                       | -                       |
| XI   | XO   | <b>0.17 (0.03-0.81)</b>       | 0.21 (0.01-4.95) | 0.21 (0.01-5.23) | -                       | -                       | -                       |
| XI   | XOB  | 0.36 (0.04-2.82)              | 0.40 (0.01-24.2) | 0.44 (0.01-29.6) | -                       | -                       | -                       |
| XI   | XOBC | 0.60 (0.06-4.84)              | 0.67 (0.01-55.0) | 0.73 (0.01-67.7) | -                       | -                       | -                       |
| XI   | O    | <b>0.12 (0.02-0.61)</b>       | 0.13 (0.00-3.81) | 0.13 (0.00-4.13) | -                       | -                       | -                       |
| XIB  | XO   | 0.62 (0.34-1.14)              | 0.79 (0.08-7.65) | 0.78 (0.07-8.15) | -                       | -                       | -                       |
| XIB  | XOB  | 1.33 (0.30-5.60)              | 1.51 (0.05-48.7) | 1.64 (0.05-58.3) | <b>0.23 (0.06-0.80)</b> | 0.22 (0.05-1.03)        | 0.23 (0.04-1.16)        |
| XIB  | XOBC | 2.20 (0.48-9.73)              | 2.51 (0.05-117)  | 2.72 (0.05-140)  | 0.36 (0.09-1.36)        | 0.36 (0.07-1.85)        | 0.36 (0.06-2.11)        |
| XIB  | X    | -                             | -                | -                | <b>0.45 (0.21-0.95)</b> | 0.44 (0.17-1.22)        | 0.45 (0.15-1.36)        |
| XIB  | O    | <b>0.45 (0.22-0.90)</b>       | 0.50 (0.04-6.37) | 0.49 (0.04-6.89) | -                       | -                       | -                       |
| XO   | XOB  | 2.13 (0.51-8.60)              | 1.93 (0.07-48.6) | 2.14 (0.07-62.4) | -                       | -                       | -                       |
| XO   | XOBC | 3.53 (0.81-15.1)              | 3.23 (0.08-119)  | 3.52 (0.08-155)  | -                       | -                       | -                       |
| XO   | O    | 0.73 (0.46-1.16)              | 0.63 (0.11-3.67) | 0.63 (0.10-3.86) | -                       | -                       | -                       |
| XOB  | XOBC | <b>1.66 (1.17-2.37)</b>       | 1.65 (0.31-8.74) | 1.66 (0.30-9.22) | <b>1.62 (1.15-2.30)</b> | 1.62 (0.89-2.94)        | 1.62 (0.82-3.24)        |
| XOB  | X    | -                             | -                | -                | 2.00 (0.46-8.93)        | 2.00 (0.31-12.7)        | 1.96 (0.28-14.6)        |
| XOB  | O    | 0.34 (0.08-1.50)              | 0.33 (0.01-10.5) | 0.30 (0.01-11.2) | -                       | -                       | -                       |
| XOBC | X    | -                             | -                | -                | 1.24 (0.27-5.74)        | 1.25 (0.18-8.55)        | 1.21 (0.16-9.94)        |
| XOBC | O    | <b>0.21 (0.05-0.94)</b>       | 0.20 (0.00-9.35) | 0.18 (0.00-10.1) | -                       | -                       | -                       |

X, capecitabine; B, bevacizumab; C, cetuximab; F, 5-fluorouracil; I, irinotecan; L, leucovorin; O, oxaliplatin; P, panitumumab. Bold fonts indicate significant difference.



| ORR           |         | DCR                |              | OS         |         | PFS        |         | AEs grade $\geq 3$ |         | SAEs       |         |
|---------------|---------|--------------------|--------------|------------|---------|------------|---------|--------------------|---------|------------|---------|
| Comparison    | P-value | Comparison         | P-value      | Comparison | P-value | Comparison | P-value | Comparison         | P-value | Comparison | P-value |
| XO vs LFO     | 0.37    | LFOIB vs LFOI      | 0.82         |            |         |            |         |                    |         |            |         |
| LFOC vs LFOB  | 0.88    | XB vs X            | 0.32         |            |         |            |         |                    |         |            |         |
| LFOIB vs LFOB | 0.92    | XO vs X            | 0.31         |            |         |            |         |                    |         |            |         |
| LFOP vs LFOB  | 0.88    | XIB vs XB          | 0.33         |            |         |            |         |                    |         |            |         |
| XOB vs LFOB   | 0.95    | XOB vs XIB         | 0.23         |            |         |            |         |                    |         |            |         |
| LFOIB vs LFOI | 0.98    | <b>XOC vs XO</b>   | <b>0.01</b>  |            |         |            |         |                    |         |            |         |
| LFOIC vs LFOI | 0.21    | <b>XOBC vs XOB</b> | <b>0.01</b>  |            |         |            |         |                    |         |            |         |
| XB vs X       | 0.35    | <b>XOC vs XOBC</b> | <b>0.004</b> |            |         |            |         |                    |         |            |         |
| XO vs X       | 0.36    |                    |              |            |         |            |         |                    |         |            |         |
| XIB vs XB     | 0.36    |                    |              |            |         |            |         |                    |         |            |         |
| XOB vs XIB    | 0.99    |                    |              |            |         |            |         |                    |         |            |         |
| XOC vs XO     | 0.80    |                    |              |            |         |            |         |                    |         |            |         |
| XOBC vs XOB   | 0.82    |                    |              |            |         |            |         |                    |         |            |         |
| XOC vs XOBC   | 0.82    |                    |              |            |         |            |         |                    |         |            |         |

ORR, overall response rate; DCR, disease control rate; OS, overall survival; PFS, progression-free survival; AEs, adverse events; SAEs, serious adverse events; X, capecitabine; B, bevacizumab; C, cetuximab; F, 5-fluorouracil; I, irinotecan; L, leucovorin; O, oxaliplatin; P, panitumumab. Bold fonts indicate significant difference.

**Supplementary Table S8.** Global  $I^2$  for between-trial heterogeneity.

| <b>Outcome</b>   | <b>ORR</b> | <b>DCR</b> | <b>OS</b> | <b>PFS</b> | <b>AEs grade <math>\geq 3</math></b> | <b>SAEs</b> |
|------------------|------------|------------|-----------|------------|--------------------------------------|-------------|
| Pairwise $I^2$   | 39.02      | 31.85      | 30.36     | 69.24      | 84.41                                | 0           |
| Consistent $I^2$ | 37.70      | 49.46      | 53.18     | 70.08      | 81.54                                | 0           |

ORR, overall response rate; DCR, disease control rate; OS, overall survival; PFS, progression-free survival; AEs, adverse events; SAEs, serious adverse events.

**Supplementary Table S9.** Treatment ranking probability for primary and secondary treatments of colorectal cancer.

| Treatment    | ORR          |              | DCR          |              | OS           |              | PFS          |              | AEs grade $\geq 3$ |              | SAEs         |              |
|--------------|--------------|--------------|--------------|--------------|--------------|--------------|--------------|--------------|--------------------|--------------|--------------|--------------|
|              | 1st line     | 2nd line     | 1st line     | 2nd line     | 1st line     | 2nd line     | 1st line     | 2nd line     | 1st line           | 2nd line     | 1st line     | 2nd line     |
| LFI          | 0.00         | 0.00         | 0.00         | 0.00         | 0.00         | 0.00         | 0.00         | 0.00         | 0.14               | 0.80         | 0.02         | 0.08         |
| LFIB         | 0.00         | 0.00         | 0.74         | 9.30         | 0.00         | 0.00         | 0.56         | 2.41         | 5.23               | 9.48         | 0.09         | 0.37         |
| LFIC         | 0.00         | 0.00         | 0.00         | 0.00         | 0.26         | 1.22         | 0.54         | 1.82         | 0.34               | 0.80         | 0.92         | 1.26         |
| LFIP         | 0.21         | 1.51         | 0.00         | 0.03         | 0.00         | 0.01         | 0.05         | 0.19         | 0.02               | 0.05         | 0.01         | 0.02         |
| <b>LFIBP</b> | 0.02         | 0.16         | 0.24         | 2.79         | 4.40         | 8.94         | 18.45        | <b>19.08</b> | 0.16               | 0.38         |              |              |
| LFO          | 0.00         | 0.00         | 0.00         | 0.00         | 0.00         | 0.02         | 0.06         | 0.51         | 0.02               | 0.21         | 6.23         | 10.48        |
| LFOB         | 0.00         | 0.00         | 0.26         | 3.21         | 0.00         | 0.01         | 0.04         | 0.26         | 1.73               | 3.91         | 0.11         | 0.80         |
| LFOC         | 0.06         | 0.53         | 0.05         | 0.60         | 2.13         | 6.68         | 3.69         | 10.36        | 0.43               | 0.89         | 0.44         | 1.20         |
| LFOP         | 0.00         | 0.01         | 0.06         | 0.73         | 0.06         | 0.54         | 0.55         | 2.25         | 0.06               | 0.23         | 0.01         | 0.14         |
| <b>LFOI</b>  | 0.00         | 0.00         | 0.00         | 0.40         | 0.00         | 0.01         | 0.00         | 0.00         |                    |              |              |              |
| <b>LFOIB</b> | 0.05         | 0.59         | 7.19         | <b>47.04</b> | 0.16         | 0.40         | 2.89         | 6.98         | 0.60               | 0.83         | 4.00         | 7.48         |
| LFOIC        | 7.50         | 15.65        |              |              |              |              |              |              |                    |              |              |              |
| <b>LFOIP</b> | <b>43.00</b> | 23.21        | <b>85.62</b> | 7.20         |              |              | 0.19         | 0.27         |                    |              |              |              |
| <b>LF</b>    | 0.00         | 0.00         | 0.00         | 0.00         | 0.05         | 0.23         | 0.69         | 1.73         | 21.03              | <b>25.83</b> |              |              |
| LFB          | 0.00         | 0.01         | 0.08         | 0.50         |              |              |              |              | 9.62               | 6.26         |              |              |
| LFC          | 0.00         | 0.00         |              |              | 0.97         | 1.84         | 1.5          | 2.12         |                    |              |              |              |
| LFBC         | 0.00         | 0.00         | 21.12        | 6.16         |              |              |              |              |                    |              | 0.61         | 1.13         |
| LFP          | 0.08         | 0.44         |              |              | 28.00        | 15.77        | 6.23         | 7.56         | 5.10               | 3.36         | 3.23         | 4.19         |
| CB           | 0.10         | 0.31         |              |              |              |              |              |              |                    |              |              |              |
| CI           | 0.04         | 0.33         | 0.00         | 0.06         |              |              |              |              |                    |              |              |              |
| CIB          | 1.53         | 4.26         | 0.19         | 1.24         |              |              |              |              |                    |              |              |              |
| IO           | 0.00         | 0.00         | 0.00         | 0.00         | 0.02         | 0.07         | 0.01         | 0.05         |                    |              |              |              |
| IOB          | 0.03         | 0.12         | 0.03         | 0.17         | 0.05         | 0.13         | 3.02         | 4.46         |                    |              |              |              |
| IP           | 0.07         | 0.24         | 0.00         | 0.02         |              |              |              |              |                    |              |              |              |
| FI           | 0.00         | 0.00         | 0.01         | 0.10         |              |              |              |              |                    |              |              |              |
| XB           | 0.00         | 0.00         | 0.02         | 0.19         | <b>55.80</b> | 21.74        | <b>39.05</b> | 11.95        |                    |              | 8.34         | 13.48        |
| XC           | 25.89        | 9.62         | 1.17         | 4.06         |              |              |              |              |                    |              |              |              |
| XI           | 0.23         | 0.68         | 1.76         | 7.41         |              |              |              |              | 2.84               | 2.64         |              |              |
| XIB          | 0.00         | 0.00         | 0.03         | 0.37         | 0.05         | 0.27         | 0.83         | 2.62         | 9.22               | 7.70         | 0.02         | 0.06         |
| XIC          | 6.49         | 15.97        | 0.11         | 0.65         |              |              |              |              |                    |              |              |              |
| XO           | 0.00         | 0.00         | 0.00         | 0.05         | 0.01         | 0.09         | 0.18         | 0.94         | 5.33               | 9.54         |              |              |
| <b>XOB</b>   | 0.00         | 0.00         | 0.01         | 0.11         | 0.06         | 0.38         | 0.38         | 2.48         | 4.68               | 7.54         | <b>61.97</b> | 11.85        |
| <b>XOC</b>   | 14.70        | <b>26.29</b> | 0.98         | 5.59         |              |              |              |              |                    |              |              |              |
| <b>XOBC</b>  | 0.00         | 0.03         | 0.31         | 1.97         | 3.13         | 5.98         | 21.06        | 18.63        | 4.64               | 3.80         | 2.72         | <b>35.82</b> |
| X            | 0.00         | 0.00         | 0.00         | 0.00         | 4.83         | <b>35.67</b> | 0.03         | 3.34         |                    |              | 11.31        | 11.66        |

| Treatment | ORR      |          | DCR      |          | OS       |          | PFS      |          | AEs grade $\geq 3$ |          | SAEs     |          |
|-----------|----------|----------|----------|----------|----------|----------|----------|----------|--------------------|----------|----------|----------|
|           | 1st line | 2nd line | 1st line | 2nd line | 1st line | 2nd line | 1st line | 2nd line | 1st line           | 2nd line | 1st line | 2nd line |
| C         | 0.00     | 0.00     | 0.00     | 0.00     |          |          |          |          |                    |          |          |          |
| I         | 0.00     | 0.00     | 0.00     | 0.00     |          |          |          |          |                    |          |          |          |
| <b>O</b>  | 0.00     | 0.00     | 0.00     | 0.00     |          |          |          |          | <b>28.84</b>       | 15.74    |          |          |
| P         | 0.01     | 0.04     | 0.01     | 0.06     |          |          |          |          |                    |          |          |          |

ORR, overall response rate; DCR, disease control rate; OS, overall survival; PFS, progression-free survival; AEs, adverse events; SAEs, serious adverse events; X, capecitabine; B, bevacizumab; C, cetuximab; F, 5-fluorouracil; I, irinotecan; L, leucovorin; O, oxaliplatin; P, panitumumab. Bold fonts indicate highest probabilities.

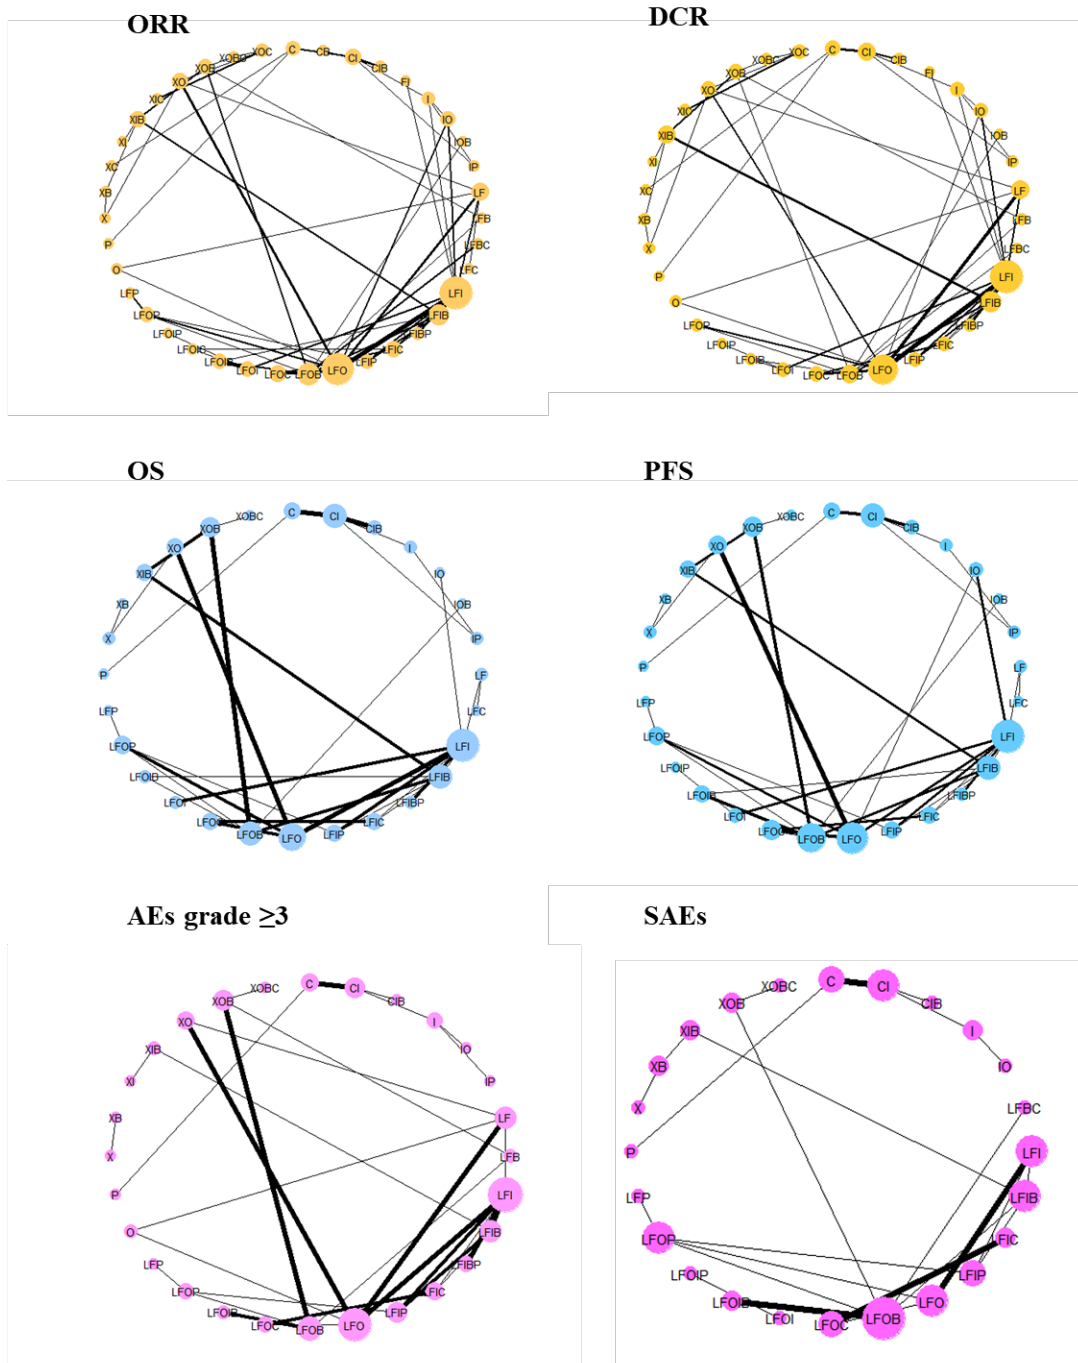

**Supplementary Figure S1.** Network geometry of all possible treatments.

ORR, overall response rate; DCR, disease control rate; OS, overall survival; PFS, progression-free survival; AEs, adverse events; SAEs, serious adverse events; X, capecitabine; B, bevacizumab; C, cetuximab; F, 5-fluorouracil; I, irinotecan; L, leucovorin; O, oxaliplatin; P, panitumumab. The network plots are based on treatments performing a connected network according to different types of outcomes. The size of node relates the number of participants for each treatment, and the thickness of line illustrates the number of studies for each comparison.
